# Supplementary material for: Using Constellation Pharmacology to Characterize a Novel α-Conotoxin from Conus ateralbus
Source: MDPI journal article supplement (doi:10.3390/md22030118), 2024-02-29
Supplement: s1 [file s1]

## Using Constellation Pharmacology to characterize a novel $\alpha$ -conotoxin from *Conus ateralbus*

Jorge L. B. Neves<sup>1,2</sup>, Cristoval Urcino<sup>2</sup>, Kevin Chase<sup>2</sup>, Cheryl Dowell<sup>2</sup>, Arik J. Hone<sup>2,3</sup>, David Morgenstern<sup>4</sup>, Victor M. Chua<sup>2</sup>, Iris Bea L. Ramiro<sup>2,5</sup>, Julita S. Imperial<sup>2</sup>, Lee S. Leavitt<sup>2</sup>, Jasmine Phan<sup>2</sup>, Fernando A. Fisher<sup>2</sup>, Maren Watkins<sup>2</sup>, Shrinivasan Raghuraman<sup>2</sup>, Jortan O. Tun<sup>2</sup>, Beatrix M. Ueberheide<sup>4</sup>, Michael McIntosh<sup>2,6,7</sup>, Vitor Vasconcelos<sup>1,8</sup>, Baldomero M. Olivera<sup>2</sup>, Joanna Gajewiak<sup>2,\*</sup>

<sup>1</sup> Interdisciplinary Centre of Marine and Environmental Research (CIIMAR/CIMAR-LA), University of Porto, Terminal de Cruzeiros do Porto de Leixões, Avenida General Norton de Matos, S/N, 4450-208 Matosinhos, Portugal

<sup>2</sup> School of Biological Sciences, University of Utah, Salt Lake City, UT 84112 USA

<sup>3</sup> Mental Illness Research Education and Clinical Center George E. Whalen Veterans Affairs Medical Center, Salt Lake City, UT 84148, USA

<sup>4</sup> Departments of Biochemistry and Molecular Pharmacology, New York University Langone Medical Center, New York, NY 10016, USA;

<sup>5</sup> The Marine Science Institute, University of the Philippines, Quezon City 1101, Philippines

<sup>6</sup> Department of Psychiatry, University of Utah, Salt Lake City, UT 84108, USA

<sup>7</sup> Mental Health Department, George E. Whalen Veterans Affairs Medical Center, Salt Lake City, UT 84148, USA

<sup>8</sup> Faculty of Sciences, University of Porto, Rua do Campo Alegre, 4169-007 Porto, Portugal

\* Correspondence: jgajewiak@gmail.com.

**Figure S1. Biological activity of the native peptide in fraction F22.5 observed in Calcium-imaging traces from selected DRG neurons.** Each trace represents the intracellular calcium concentration (y-axis) of a single neuron over the time course of the experiment (x-axis). Arrows on the x axis mark 15-s applications of 20 mM KCl ( $K^+$ ) to depolarize the neurons. The horizontal bar indicates when the venom fraction was present in the bath solution. The pure venom fraction (F22.5) caused an enhancement of the amplitude and duration of the response to a depolarizing stimulus, which was reversible.

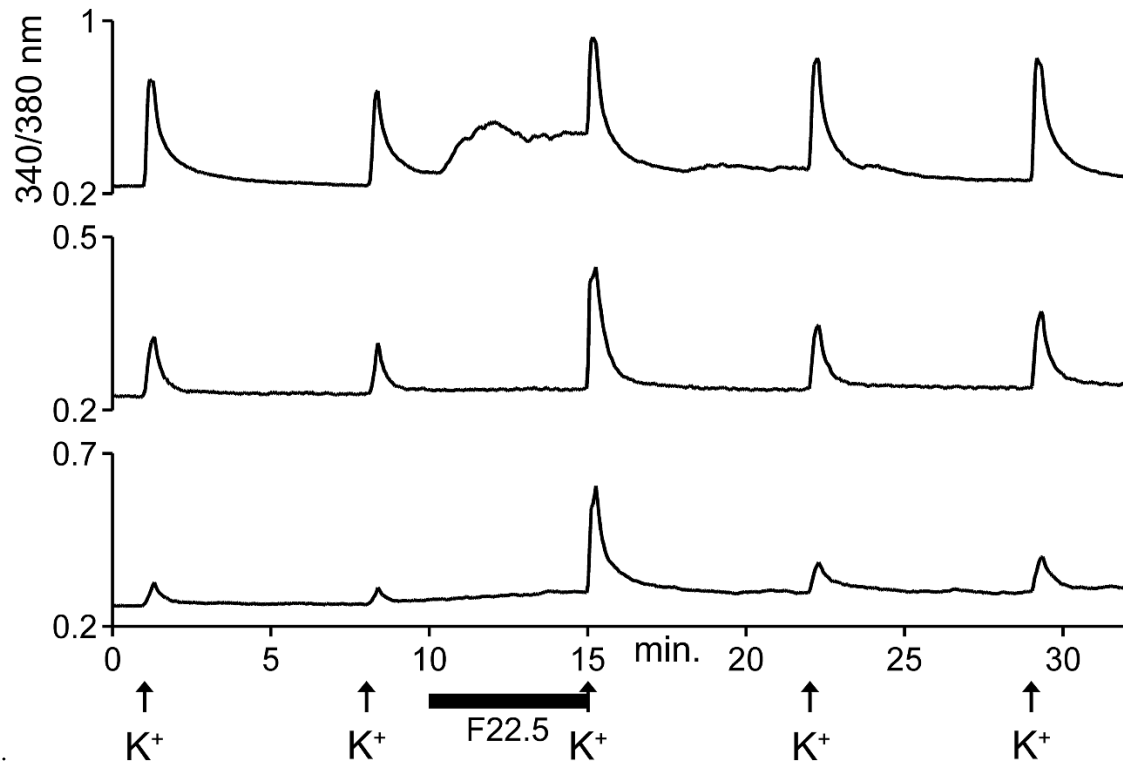

**Figure S2. Effects  $\alpha$ Ctx-AtIA on induced 20 mM KCl calcium influx pulses.** Cell images and calcium imaging traces are shown for 6 representative neurons showing an  $\alpha$ Ctx-AtIA-induced amplified response to a depolarizing stimulus of 20 mM KCl. The calcium imaging protocol begins with two control 20 mM KCl pulses (7 min intervals between all pulses), an incubation of 10  $\mu$ M  $\alpha$ Ctx-AtIA, followed by a pulse of 20 mM KCl + 10  $\mu$ M  $\alpha$ Ctx-AtIA. The remaining pulses, as well as cell fluorescence and morphology, were used to classify cell types. Approximately 4% of total neurons displayed this amplification effect from the peptide. These cells were classified as medium diameter peptidergic and non-peptidergic nociceptors.

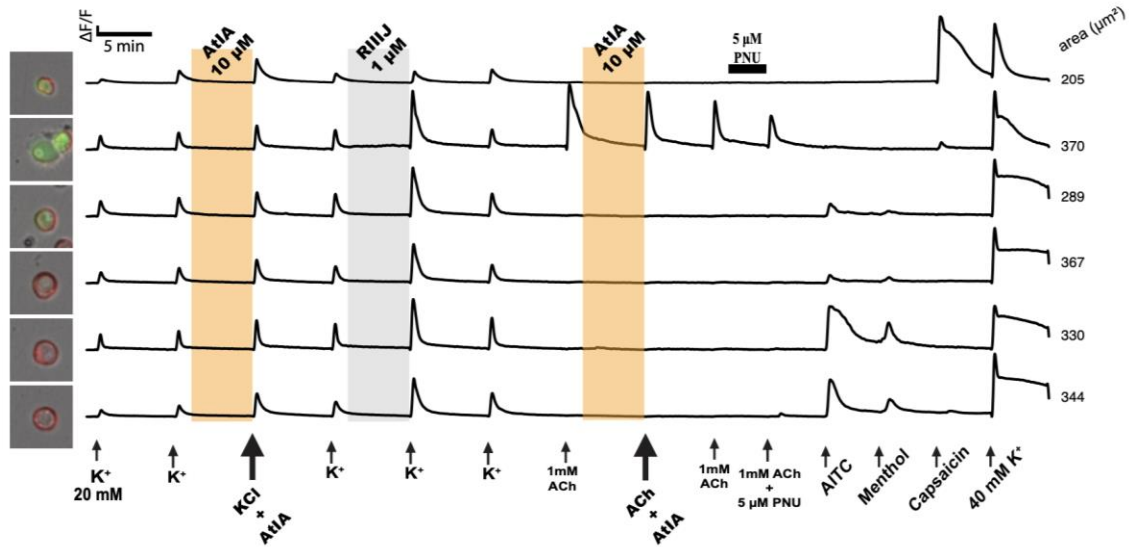

**Figure S3. The ACh or ACh+PNU block count tables.** Each 2x2 table shows the number of cells not blocked (left column) or blocked (right column) by the peptide listed as the column header and the counts for the same cells that were not blocked (top row) or blocked (bottom row) with the peptide listed as the row header. Only cells tested by both peptides in the same experiment are shown in these contingency tables. The number of experiments for each pair of peptides are: (A) n=6 (B) n=4 (C) n=5 (D) AtIA x PeIA n=6, AtIA[des18W] x PeIA n= 4, AtIA[des1Z] x PeIA n=6 (E) AtIA x PeIA n=4, AtIA[des18W] x PeIA n= 4, AtIA[des1Z] x PeIA n=7.

**A**

| ACh<br>block count |      |     |
|--------------------|------|-----|
|                    | AtIA |     |
| PeIA               | 11   | 4   |
|                    | 101  | 104 |

**B**

| ACh+PNU<br>block count |      |    |
|------------------------|------|----|
|                        | AtIA |    |
| PeIA                   | 54   | 58 |
|                        | 0    | 2  |

**C**

| ACh+PNU<br>block count |                     |    |
|------------------------|---------------------|----|
|                        | ArlB<br>[V11L;V16D] |    |
| AtIA                   | 104                 | 24 |
|                        | 25                  | 49 |

**D**

| ACh<br>block count |      |     |
|--------------------|------|-----|
|                    | PeIA |     |
| AtIA               | 11   | 101 |
|                    | 4    | 104 |
| AtIA [des18W]      | 33   | 11  |
|                    | 10   | 199 |
| AtIA[des1Z]        | 35   | 288 |
|                    | 0    | 28  |

**E**

| ACh+PNU<br>block count |      |    |
|------------------------|------|----|
|                        | AtIA |    |
| PeIA                   | 54   | 58 |
|                        | 0    | 2  |
| AtIA [des18W]          | 80   | 85 |
|                        | 1    | 38 |
| AtIA[des1Z]            | 157  | 27 |
|                        | 4    | 57 |

File S1. Fasta file of aligned sequences used for phylogenetic analysis.

>ebraeus

```
AACCAAGAAATTTAGTCATTCTTTACGGTAAAAAGACAGTTAAGCAGG-TAGAATCATT
AGATCTTCAATATAGGAGTAAAATCTAAATATTGGAAGTTATACCTAACGTGGTTT-ATT
TATGCTGAAGCTGTGATAGCTTTAAGGGAACTGGGATTGGATACCCCATTTTITAGT
CGTAAATTTAGTT--TAAGCTTACCAGAGTACTACGAATGTTTAAACTCAAAGGGCTTG
GCGGTGTTTTAGACCTCTCAGGGGAACCTGTCTCATAATCGACAATCCACGTAAACCTG
ACTCTTTGTGGCAAGTCAGCCTGTATACCGTCGTCGTCAGGTAACCTCTTAAATATAGT
AGTTAGCTAGAGAATT--AT-ATTAATTAGAACGTCAGATCAAGGTGCAGCTAATAAAAG
AGTGAGGATGGGTACAATTACAGATTTGTAATTACGGCACT-TGAAAT-AAGTGTCTTG
AAGGAGGACTTGAAAGTAATTTTGAGTATATAAACAAAATGAATAAGGCTCTGAAACGTG
CAGAATTTTAATGGTCGAACAGACCAACCCTCAAAGACTTCTGCATCTTTAGGATATTCT
GGTCCAACATCGAGGTCACAAACCTTTTTTCGATATGGGCTCTCAAAAAGATAATGCT
GTTATCCCTACGGTAACTAATTCCTTTGATCAAAATTCT-TGGATCCTC-TCAAGTAAGA
CTTC-AAGGGAGGCTTTATCTACTCCTCGGTTGCCCCAACCAAAGT--ATTTAATAGCTT
T-TTTTTTA-GTTAATT---AAATACTCCATTAATTTTTCTGAAGCTCGATAGGGTCTTC
TTGTCTTTTAATAATATCTGGGCTTTTTCGCCCAAAGATAAAATTCTAAATAATCTAAAA
GAGACAGGTGTATTCTTGTCAAACCATTCAATCCAGCCTCAATTATAAGGCAAATGATT
ATGCTACCTTTCACGGTCAGAGTACCGCGGCCGTT-TAAAC-CACTGGGCAGGTCCGAC
TTCGCATTTGAT-GATTACACGACATTGTATATTTTATTTGGGATATGGTCCGTTTGGT
CGGAACTGCCCTGAGATTGCTAATTCGTGCAGAGTTAGGACAACCGGGAGCCCTACTTGG
AGATGATCAGCTGTATAACGTGATTGTAACAGCCCATGCTTTTGTATAATTTTTTTCTT
AGTGATACCTATGATGATTGGTGGTTTCGGAACTGACTAGTACCACTAATATTAGGAGC
TCCAGATATGGTATTTCTCGGTTAAATAATATAAGTTTCTGGTTACTTCCTCCTGCACT
TTTACTTCTCTTATCTTCAGCCGCGGTAGAGAGTGGAGTGGGTACGGGATGAACGGTGTA
TCCACCTCTATCAGGAACTTAGCACATGCCGGTGGGTGAGTAGATCTGGCAATTTTTTC
TTTACACCTTGCCGGGGTTTCTTCTATTTTAGGAGCGGTGAATTTTATTACTACAATTAT
TAATATGCGATGACAAGGGATAAAATTTGAACGTCTTCGCTATTTGTGTGGTCAGTAA
AATTACAGCTATTTTACTTTTACTGTCTCTTCTGTGTTAGCGGGGGCAATTACGATGCT
TTTGACAGATCGAAATTTTAATACTGCCTTCTTCGACCCAGCAGGAGGTGGTGATCCAAT
CTTGATCAGCACTTGTTT
```

>chaldeus

```
AACCAAGAAATTTAGTCATTCTTTACGGTAAAAAGACAGTTAAGCAGG-TGAGATCATC
AGATCTTCAATATAGGAGTAAAATCTAAATATTGAAAGTAATGCCTAACGTGATTT-ATT
TATGCTGAAGCTGTGATAGCTTTAAGGGAACTGGGATTGGATACCCCATTTTITAGT
CGTAAATTTAGTA--TAAGCTTACCAGAGTACTACGAATGTTTAAACTCAAAGGGCTTG
GCGGTGTTTTAGACCTCTCAGGGGAACCTGTCTCATAATCGACAATCCACGTAAACCTA
GCTCTTTATGGCAAGCCAGCCTGTATACCGTCGTCGTCAGGTAACCTCTTAAATATAGT
AGTTAGCTAGAGAATT--AT-ATTAATTAACGTCAGATCAAGGTGCAGCTAATAAAAG
AGTGAGGATGGGTACAATTACAGATTTGCAATTACGGCACT-TGAAAT-AAGTGTCTTA
AAGGAGGACTTGAAAGTAATTTTGATTATATAAACAAAATGAATAAGGCTCTGAAACGTG
CAGAATTTTAATGGTCGAACAGACCAACCCTCAAAGACTTCTGCATCTTTAGGATATTCT
GGTCCAACATCGAGGTCACAAACCTTTTTTCGATATGGGCTCTCAAAAAGATAATGCT
GTTATCCCTACGGTAACTAATTCCTTTGATCAAAATTCT-TGGGTCCTC-ACAAGTAAGA
CTTC-AAAGGAGGCTTTGTCTACTCCTCGGTTGCCCCAACCAAAGT--ATTTAATAGCCT
T-TTTTTTA-ATTAATT---AAACACTCTATTAATTTTTCTGAAGCTCGATAGGGTCTTC
TTGTCTATTAATAAAATCTGGGCTTTTCACCCAAAGATAAAATTCTAAATAATCTAAAA
```

GAGACAGGTGTATTCTTGTCAAACCATTCAATCCAGCCTTCAATTATAAGGCAAATGATT  
ATGCTACCTTTGCACGGTCAGAGTACCGCGGCCGTT-TAAAC-CACTGGGCAGGTCCGAC  
TTCGCATTTGAT-AATTACACGACATTGTATATTTTATTTGGGATATGGTCCGGTCTGGT  
TGGGACTGCCTTGAGATTGTTAATTCGTGCAGAATTAGGACAACCGGGAGCCCTCCTGGG  
AGATGATCAGCTGTATAACGTAATTGTGACGGCTCATGCTTTTGTATAATTTTTTCTT  
AGTGATACCTATGATGATCGGTGGTTTTGGAAATTGATTAGTACCATTAAATATTAGGGGC  
TCCAGATATAGTATTTCTCGATTAAATAATATAAGTTTCTGGTTACTTCCTCCTGCTCT  
TTTACTTCTATTATCTTCGGCTGCAGTAGAAAGTGGAGTGGGTACAGGATGAACGGTGT  
TCCGCTCTATCAGGAAATTTAGCACATGCTGGTGGGTGAGTAGATCTGGCAATTTTTTC  
TTTACACCTTGCTGGGGTTTCTTCTATTTTAGGAGCAGTAACTTTATTACTACAATTAT  
TAATATGCGATGACAAGGAATAAAATTTGAACGTCTTCGCTATTCGTGTGATCAGTAA  
GATTACGGCTATTTTACTTTTACTGTCTCTCCCTGTGTTAGCAGGGGCAATTACAATGCT  
TTTGACGGATCGAAATTTAATACTGCTTCTTCGATCCAGCAGGAGGTGGTGATCCGAT  
CTTATATCAGCACTTGTTT

>coronatus

AACCAAGAAATTTAGTCATTCTTTACGGTAAAAAGACAGTTAAGCAAG-CGAAATCATT  
AGATCTTTAATATAGGAGTAAATCTAAATATTGAAAGTTATACCTAGCGTGATTT-ATT  
TAAGCTGAAGCTGTGATAGCTTTAAGGGAACTGGGATTGGATACCCCATTTTATTTAGT  
CGTAAATTTAGTT--TAGGCTTACCAGAGTACTACGAATGTTTAAACTCAAGGGGCTTG  
GCGGTGTTTTAGACCTCTCAGGGGAACCTGTCTCGTAATCGACAATCCACGTTAAACCTA  
ACTCTTTATGGCAAGTCAGCCTGTATACCGTCGTCGTCAGGTAAGTCTTAAATATAGT  
AGTTAGCTCGAGAATT--TC-ATTAATTAACCGTCAGATCAAGGTGCAGCTAATAAAAG  
AGTGAGGATGGGTACAATTACAAATTTGTAATTACGGCACT-TGAAACGAAGTGACTTA  
AAGGAGGACTTGAAAGTAATTTGATTATATAAACAATGAATAAGGCTCTGAAACGTG  
CAGAATTTAATGGTGAACAGACCAACCTCAAAGACTTCTGCATCTTTAGGATATTCT  
GGTCCAACATCGAGGTCACAAACCTTTTTTCGATATGGGCTCTCAAAAAGATAATGCT  
GTTATCCCTACGGTAACCTAATTTCTTTGATCAAAATTCT-TGGATCCTC-ACAAGTAAGA  
CTTC-AAAGGAGGCTTTGTTTACTCCTCGGTTGCCCCAACCAAGT--ATTTAATAGCTT  
T-CTTTTA-ACCAATT---AAAATCTCTATTAATTTTTCTGAAGCTCGATAGGGTCTC  
TTGTCTTTAATAACAATCTGGGCTTTTTACCCAAAGATAAAATTCTAAATAATCTAAAA  
GAGACAGGTGTATTCTTGTCAAACCATTCAATCCAGCCTTCAATTATAAGGCAAATGATT  
ATGCTACCTTTGCACGGTCAGAGTACCGCGGCCGTT-TAAAC-CACTGGGCAGGTCCGAC  
TTCGATTTAAC-GACTACACGACATTGTACATTTTATTTGGAATATGATCTGGCTTAGT  
TGGGACTGCCTTGAGGTTACTAATCCGTGCAGAATTAGGACAACCGGGAGCCCTGCTTGG  
AGACGATCAGTTGTATAATGTAATTGTAACAGCCCATGCTTTTGTATAATTTTTTCTT  
AGTGATACCTATGATGATTGGTGGCTTTGGGAACTGATTGGTGCCACTAATATTAGGGGC  
TCCAGACATGGTATTTCTCGTTAAATAATATGAGTTTCTGGTTACTTCCTCCTGCTCT  
TTTACTTCTTTATCTTCAGCTGCAGTAGAAAGTGGGGTGGGTACTGGATGAACAGTATA  
CCCTCCTTTATCAGGAACTTGGCGCATGCTGGTGGGTGAGTAGATCTGGCAATTTTCTC  
TTTGATCTTGCCGGAGTTTCTTCTATTTTAGGGGCTGTAAATTTTATTACTACAATTAT  
TAATATGCGATGACAAGGAATAAAATTTGAACGTCTTCGCTGTTTGTGTGATCAGTAA  
GATTACAGCTATTTTACTTTTACTGTCTCTTCTGTCTTAGCAGGAGCAATTACAATACT  
TTTAACGGATCGAACTTTAATACTGCTTCTTTGACCCAGCAGGAGGTGGTGACCCTAT  
CTTGATCAGCACTTGTTT

>miliaris

AACCAAGAAATTTAGTCATTCTTTACGGTAAAAAGACAGTTAAGCAAG-GGAAATCATT  
AGACCTTTAGTATAGGAGTAAATCCAAATATTAAGTTATACCCAACGTGGTTT-ATT  
TATGCTGAAGCTGTGATAGCTTTAAGGGAACTGGGATTGGATACCCCATTTTATTTAGT

CGTAAATTTAGTT--CAAGCTTACCAGAGTACTACGAATGTTTAAAACTCAAAGGGCTTG  
GCGGTGTTTTAGACCTCTCAGGGGAACCTGTCTCATAATCGACAATCCACGTTATACCTA  
ACTCTTTATGGCAAGTCAGCCTGTATACCGTCGTCGTCAGGTAACCTTCTAAAAATATAGT  
AGTTAGCTCGAGAACT--TT-ATTAGTTAAACGTCAGATCAAGGTGCAGCTAATAAAAG  
AGTGAGGATGGGTTACAATTACAGATTTGTAATTACGGCACT-TGAAATGAAGTGACTTA  
AAGGAGGACTTGAAAGTAATTTTGATTATATAAGCAAATGAATAAGGCTCTGAAACGTG  
CNNNNNNNNNNNNNNNNNNNNNNNNNNNNNNNNNNNNNNNNNNNNNAGACTTCTGCATCTTTAGGATATTCT  
GGTCCAACATCGAGGTCACAAACCTTTTTTTCGATATGGGCTCTCAAAAAAGATAATGCT  
GTTATCCCTACGGTAACATAATTCTTTGATCAAAATTCT-TGGATCATC-TCAAGTAAGA  
CTTC-AAAGGAGGCTTTATTTACTCCTCGGTTGCCCAACCAAAGT--ATTTAATAGCTT  
T-TTTTTTA-ATTAATT---AAGTACTCTATTAATTTTTCTGAAGCTCGATAGGGTCTTC  
TTGTCTTTTAATAAAATCTAGGCTTTTTACCCAGAGATAAAATTCTAAATAATCTAAAA  
GAGACAGGTGTATTCTTGTCAAACCATTCATTCCAGCCTTCAATTATAAGGCAAATGATT  
ATGCTACCTTTGCACGGTCAGAGTACCGCGGCCGT-TAAAC-CACTGGGCAGGTCCGAC  
TTCGTATTTAAT-GCTTACACGACATTGTATATTTTATTTGGGATATGATCTGGCTTGGT  
TGGGACTGCCCTAAGATTGCTAATTCGTGCAGAGTTAGGACAGCCGGGAGCTTTGCTTGG  
AGATGATCAGCTATATAATGTGATTGTAACAGCCCATGCTTTTGTATAATTTTTTCTT  
AGTGATACCTATAATGATTGGTGGTTTTGGTAATTGATTAGTGCCGCTGATGTTAGGGGC  
TCCAGATATGGTGTTTCTCGTTTAAATAACATAAGTTTCTGGTACTCCCTCCTGCCCT  
TCTACTTCTTTTATCTTCAGCTGCGGTAGAAAGCGGAGTGGGTACGGGATGAACGGTGT  
TCCACCTTTATCAGGAAACTTGGCACATGCCGGCGGGTCTGTAGATCTGGCAATTTTCTC  
TTTACACCTTGCTGGGGTTTTCTTCTATTTTAGGAGCAGTAACTTTATTACTACAATTAT  
CAATATACGATGACAAGGAATAAAATTCGAACGCTTTTCGCTATTTGTGTGGTCAGTAAA  
AATTACGGCTATTCTGCTTCTGCTGTCTTCTCTGTGTTAGCAGGAGCAATTACAATGCT  
TTTAACGGATCGAAATTTAATACTGCTTCTTCGACCCAGCAGGAGGTGGTGACCCTAT  
CTTATATCAGCACTTGTTT

>ventricosus

AACCAAGAAATTTAGTCATTCTTTTATGGTAAAAAGACAGTTAAGTAAA-AAAAGTCGTT  
AGATCTTTAGTATAGGAGTAAAATCCATGTACTAAAAGTTATACCGAATATGATTT-AGT  
TATGCTGAAGCTGTGATAGCTTTAAGGGAACTGGGATTGGATACCCCATTTATTTTAGC  
TGTAATTTAGTT--TAAGCTTACCAGAGTACTACGAATGTTTAAAACTCAAAGAGCTTG  
GCGGTGTTTTAGACCTCTCAGGGGAACCTGTCTCATAATCGACAATCCACGTTAAACCTA  
ACCTTTGATAGTAATTCAGCCTGTATACCGTCGTCGTCAGGTAACCTTCTAAAAATATAGT  
AGTTAGCTTGAGAAATT--AT-ATTAATTAACGTCAGATCAAGGTGCAGCTAATGAAAA  
GGTGAGGATGGGTTACAATTACATATTTGTAAACACGGCATT-TGAAA--AAATGTCTTA  
AAGGAGGACTTGAAAGTAATTTTGATTATATAAGCAGAATGAATAGGGCTCTGAAACGTG  
CAGAATTTTAATGGTCGAACAGACCAACCCTTAAAGACTTCTGCATCTTTAGGATATTCT  
GGTCCAACATCGAGGTCACAAACCTTTTTTTCGATATGGGCTCTTAAAAAGATAATGCT  
GTTATCCCTACGGTGACTAATTCCTTTGATCAAAATTTCTGGATCAAC-ACAAGTAGGA  
TTTA-AGAGGAAGCTTTATTTGTTCTCGGTTGCCCAACCAAAGT--ATTTAATAGCTT  
T-TCTTTTA-CTTAATTG--ACAAGGTCTACTAATTCTCTAAAGCTCGATAGGGTCTTC  
TTGTCTTTAATGCTATCTGGACTTTTTCATCAAAAATAAAATTCTAAATAATCTAAAA  
GAGACAGGTGTATTCTTGTTAAACCATTCATTCCAGCCTTCAATTATAAGGCAAATGATT  
ATGCTACCTTTGCACGGTCAGAGTACCGCGGCCGT-TAAAA-CACTGGGCAGGTCCGAC  
TTCGTATTTAAT-TTTAACACGACATTATATATTTTATTTGGGATGTGATCTGGGTGGT  
TGGAAGTGCCTTAGGTTACTGATTTCGTGCAGAATTAGGTCAACCGGGTGCCTTACTTGG  
AGATGATCAATTATATAATGTGATTGTGACAGCCCATGCTTTTGTATAATTTTTTCTT  
AGTGATGCCTATAATAATTGGGGGTTTTGGAACTGGTGGTACCTTTGATGTTAGGGGC

TCCAGATATGGTATTTCTCGCTTAAATAATATAAGTTTTGACTTCTTCCCCCTGCACT  
TCTACTTCTTTATCATCAGCTGCTGTGGAAAGTGGGGTAGGTACAGGATGAACGGTATA  
TCCACCTTTGTCTGGAAATTTGGCTCATGCTGGTGGATCAGTAGATTTGGCGATTTTTTC  
TTTACATCTTGCTGGTGCGTCTTCTATTTTAGGAGCGGTGAATTTTATTACTACAATTAT  
TAATATACGATGACAAGGGATAAAATTTGAACGTCTTTCGTTATTTGTATGATCAGTAAA  
GATTACAGCTATTTTACTCCTTTTATCTCTACCTGTGTTAGCAGGTGCAATCACTATACT  
TTTAACTGATCGAAATTTTAATACTGCTTCTTTGATCCAGCAGGAGGTGGAGATCCTAT  
TTTATATCAGCATCTATTT

>dorotheae

AACCAAGAAATTTAGTCATTCTTTTATGGTAAAAAGACAGTTAAGCAGG-AAAAGTCATT  
GGACCTTTAATATAGGAGTAAAATCTAGATACTAAAAGTTATATCAGACATGGCTT-AAT  
TATGCTGAAGCTGTGATAGCTTTAAGGGAAACTGGGATTGGATACCCCATTTATTTTAGT  
TGTAATTTAGTT--TAAGCTTACCAGAGTACTACGAATGTTTAAACTCAAAGAGCTTG  
GCGGTGTTTTAGACCTCTCAGGGGAACCTGTCTCATAATCGACAATCCGCGTTAAACCTA  
ACCTTTGATAGCAATTCAGCCTGTATACCGTCGTCAGGTAACCTTCTTAAATATAGT  
AGTTAGCTTGAGAAATT--TT-ATTAATTAACCGTCAGATCAAGGTGCAGCTAATGAAAG  
GGTGAGGATGGGTTACAATTACACATTTGTAAATACGGCATT-TGAAAT--AATGTCTTA  
AAGGAGGACTTGAAAGTAATTTTGATTATATAAATAGAATGAATAGGGCTCTGAAACGTG  
CAGAATTTAATGGTCGAACAGACCAACCCTTAAGACTTCTGCATCTTTAGGATATTCT  
GGTCCAACATCGAGGTCACAAACCTTTTTTTCGATATGGGCTCTTGAAAAAGATAATGCT  
GTTATCCCTACGGTAACATAATTCCTTTGATCAAAATTTT-TGGATCAAC-ACAAGTAAGA  
TTTA-AGAGGAGGCTTTGTCTGCTCCTCGGTTGCCCCAACCAAAAT--ATTTAATAGCTT  
T---TTTTA-CTTAATTA--ATGAAGTCTACTAACTTTTCTAAAGCTCGATAGGGTCTTC  
TTGTCTTTAATACTATCTGGACTTTTTCATCCAGAAATAAAATTCTAAATAATCTAAAA  
GAGACAGGTGTATTCTTGTCAAACCATTCATTCCAGCCTTCAATTATAAGGCAAATGATT  
ATGCTACCTTTGCACGGTCAGAGTACCGCGGCCGTT-TAAAA-CACTGGGCAGGTCCGAC  
TTCGTATTTAAT-ATTAACACGACATTGTATATTTATTTGGGATATGATCTGGGTGGT  
TGGAACCGCCCTTAGATTACTAATTCGTGCAGAGTTAGGTCAACCGGGTGCCTTACTTGG  
AGATGATCAGTTATATAATGTAATTGTAAACAGCCCATGCTTTTGTTATAATTTTTTTCTT  
AGTGATGCCTATGATGATTGGGGGTTTTGGAAACTGGTTGGTGCCTTTAATGTTAGGAGC  
TCCAGATATGGTATTTCTCGTTTAAATAATATAAGTTTCTGGCTTCTCCTCCTGCACT  
TTTACTTCTTCTATCATCAGCTGCTGTGGAAAGTGGGGTAGGTACAGGATGAACTGTGTA  
TCCGCCTTTATCTGGAAATCTGGCTCATGCTGGTGGGTGAGTAGATCTGGCAATTTTTTC  
TTTACACCTTGCTGGTGTGTCTTCTATTTTAGGGGCGGTGAATTTTATTACTACAATTAT  
TAATATACGATGACAAGGGATGAAATTTGAACGCCTTTCGTTGTTTGTGTGGTCAGTGAA  
GATTACAGCTATTTTACTTCTTTTATCTTTACCTGTGTTAGCGGGTGCAATTACTATGCT  
CCTGACTGATCGAAATTTTAATACTGCTTCTTTGATCCAGCAGGAGGTGGAGATCCTAT  
TTTATATCAACATTTATTT

>ateralbus

AACCAAGAAATTTAGTCATTCTTTTATGGTAAAAAACAGTTAGGCAGG-GAAAATTATT  
AGATCTTTAGTATAGGAGTAAAATCTAAATACTAAAAGTTATATCAGACATGATTT-ATT  
TATGCTGAGGCTGTGATAGCTTTAAGGGAAACTGGGATTGGATACCCCATTTATTTTAGC  
TGTAATTTAGCT--TGAGCTTACCAGAGTACTACGAATGTTTAAACTCAAAGGGCTTG  
GCGGTGTTTTAGACCTCTCAGGGGAACCTGTCTCGTAATCGACAATCCACGATAAACCTA  
ACCTTTAATGGCAATTCAGCCTGTATACCGTCGTCGTCAGGTAACCTTCTTAAATATAGT  
AGTTAGCTTGAGAAATT--AT-ATTAATTAGAACGTCAGATCAAGGTGCAGCCAATGAAGA  
GGTGAGGATGGGTTACAATTACATATTTGTAAATACGGCGTT-TGAAATGAAGTGCTTA  
AAGGAGGACTTGAAAGTAATTTTATCTATATAAATAGAATGAATAGGGCTCTGAAACGTG



CAGAATTTTAATGGTCGAACAGACCAACCCTTAAGACTTCTGCATCTTTAGGACATTCT  
GGTCCAACATCGAGGTCACAAACCTTTTTTCGATATGGGCTCTTGAAAAAGATTATGCT  
GTTATCCCTACGGTAACTAATTCTTTAATCAATATTCT-TGGATCAAC-ACAAGTAAGA  
TTTA-AAAGGAGGTTTTATTGCTCCTTGTTGCCCAACCAAAT--ATTTAATAGCTC  
T-TCTTCTA-ATTAATTG--ATAAAATCTATTAACCTCTCTAAAGCTCGATAGGGTCTTC  
TTGTCTTTTAATTATATCTGGACTTTTTACCCAAAAATAAAATTCTAAATAATCTAAAA  
GAGACAGGTATATTCTTGTCAAACCATTCAATCCAGCCTTCAATTATAAGGCAAGTGATT  
ATGCTACCTTTGCACGGTCAGAGTACCGCGGCCGTT-TAAAA-CACTGGGCAGGTCCGAC  
TTCGTATTTAAT-TTTAACACNNNNNNNNNNNNNNNNNNNNNTGATCCGGGTTAGT  
TGGAAGTCTTTAAGATTATTAATTCGTGCGGAGTTAGGGCAGCCAGGTGCTTTGCTTGG  
AGATGATCAACTATATAATGTAATTGTAACGGCCCATGCTTTTGTATAATTTTTTCTT  
AGTAATACCTATGATGATTGGGGGTTTTGGAAATTGATTAGTGCCTTTGATATTAGGGGC  
TCCAGATATAGTATTTCTCGTTTAAATAATATGAGTTTCTGACTTCTCCCCCTGCGCT  
TTTACTTCTTTGTCGTGAGCTGCGGTAGAAAGTGGTGTGGCACAGGATGGACTGTATA  
TCCCCCTTTATCTGGAAATTTGGCTCATGCTGGTGGGTCTGTAGATCTGGCGATTTTTTC  
TTTACATCTTGCTGGGGTGTCTTCTATTTTAGGAGCGGTGAATTTCACTACTACAATTAT  
TAATATGCGATGACAAGGAATAAAATTTGAGCGTCTTTCGTTGTTGTCTGATCGGTAAA  
AATTACAGCTATTTTACTTCTTTTATCTTTACCTGTGTTGGCGGGTGCAATCACTATACT  
TCTAACTGATCGAAATTTAATACTGCTTCTTTGATCCGGCNNNNNNNNNNNNNNNNNNNN  
NNNNNNNNNNNNNNNNNNNNNN

>venulatus

AACCAAGAAATTTAGTCATTCTTTTATGGTAAAAAACAGTTAGGCAGG-GAGAATTATT  
AGATCTTTAGTATAGGAGTAAAATCTAAATACTAAAAGTTATATCAGACATGATTT-ATT  
TATGCTGAGGCTGTGATAGCTTTAAGGGAACTGGGATTGGATACCCATTATTTTTAGC  
TGTAATTTAGCT--TGAGCTTACCAGAGTACTACGAATGTTTAAACTCAAAGGGCTTG  
GCGGTGTTTTAGACCTCTCAGGGGAACCTGTCTCGTAATCGACAATCCACGATAAACCTA  
ACCTTTAATGGCAATTGAGCCTGTATACCGTCGTCGTGAGGTAACCTCTTAAATATAGT  
AGTTAGCTTGAGAATT--AT-ATTAATTAACGTCAGATCAAGGTGCAGCCAATGAAGA  
GGTGCGGATGGGTACAATTATATTTGTAAATACGGCGTT-TGAAATGAGGTGTCTTA  
AAGGAGGACTTGAAAGTAATTTTATCTATATAAATAGAATGAATAGGGCTCTGAAACGTG  
CAGAATTTTAATGGTCGAACAGACCAACCCTTAAGACTTCTGCATCTTTAGGACATTCT  
GGTCCAACATCGAGGTCACAAACCTTTTTTCGATATGGGCTCTTGAAAAAGATTATGCT  
GTTATCCCTACGGTAACTAATTCTTTAATCAATATTCT-TGGATCAAC-ACAAGTAAGA  
TTTA-AAAGGAGGTTTTATTGCTCCTTGTTGCCCAACCAAAT--ATTTAATAGCTC  
T-TCTTTTA-ATTAATCG--ATAAAATCTATTAACCTCTCTAAAGCTCGATAGGGTCTTC  
TTGTCTTTTAATTATATCTGGACTTTTTACCCAAAAATAAAATTCTAAATAATCTAAAA  
GAGACAGATATATTCTTGTCAAACCATTCAATCCAGCCTTCAATTATAAGGCAAGTGATT  
ATGCTACCTTTGCACGGTCAGAGTACCGCGGCCGTT-TAAAA-CACTGGGCAGGTCCGAC  
TTCGTATTTAAT-TTTAACACNNNNNNNNNNNNNNNNNNNTTGAATATGATCCGGGTTAGT  
TGGAAGTCTTTAAGGTTATTAATTCGTGCGGAGTTAGGGCAGCCAGGTGCTTTGCTTGG  
AGATGATCAACTATATAATGTAATTGTAACGGCCCATGCTTTTGTATAATTTTTTCTT  
AGTAATACCTATGATGATTGGGGGTTTTGGGAATTGATTAGTGCCTTTAATATTAGGGGC  
TCCAGATATAGTATTTCCACGTTTAAACAATATAAGTTTCTGACTTCTCCCCCTGCGCT  
TTTACTTCTTTGTCGTGAGCTGCGGTAGAAAGTGGTGTGGTACAGGATGGACTGTATA  
TCCCCCTTTATCTGGAAATTTGGCTCATGCTGGCGGGTCTGTAGATCTGGCGATTTTTTC  
TTTACATCTTGCTGGGGTGTCTTCTATTTTAGGAGCGGTGAATTTCACTACTACAATTAT  
TAATATGCGATGACAAGGAATAAAATTTGAGCGTCTTTCGTTGTTGTCTGATCGGTAAA  
AATTACAGCTATTTTACTTCTTTTATCTTTACCTGTGTTGGCGGGTGCAATTACTATACT

TCTAACTGATCGAAATTTTAATACTGCTTCTTTGATCCGGCAGGAGGTGGCGATCCTAT  
CTNNNNNNNNNNNNNNNNNNNN

>trochulus

AACCAAGAAATTTAGTCATTCTTTTATGGTAAAAAACAGTTAGGCAGG-GAAAATCATT  
AGATCTTTAGTATAGGAGTAAATCTAAATACTAAAAGTTATATCAGACATGATTT-ATT  
TATGCTGAGGCTGTGATAGCTTTAAGGGAACTGGGATTGGATACCCATTATTTTAGC  
TGTAATTTAGCT--TGAGCTTACCAGAGTACTACGAATGTTTAAACTCAAAGGGCTTG  
GCGGTGTTTTAGACCTCTCAGGGGAACCTGTCTCGTAATCGACAATCCACGATAAACCTA  
ACCTTTAATGGCAGTTCAGCCTGTATACCGTCGTCGTCAGGTAACCTCTTAAAATATAGT  
AGTTAGCTTGAGAATT--AT-ATTAATTAACGTCAGATCAAGGTGCAGCCAATGAAGA  
GGTGAAGATGGGTACAATTACATATTTGTAAATACGGCGTT-TGAAATGAAGTGCTTA  
AAGGAGGACTTGAAAGTAATTTTATCTATATAAATAGAATGAATAGGGCTCTGAAACGTG  
CAGAATTTAATGGTCGAACAGACCAACCCTTAAAGACTTCTGCATCTTTAGGACATTCT  
GGTCCAACATCGAGGTCACAAACCTTTTTTCGATATGGGCTCTTGAAAAAGATTATGCT  
GTTATCCCTACGGTAACTAATTCCTTTAATCAATATTCT-TGGATCAAC-ACAAGTAAGA  
TTTA-AAAGGAGGTTTTATTTGCTCCTTGTTGCCCAACCAAAT--ATTTAATAGCTC  
T-TCTTTTA-ATTAATTG--GTAAATCTATTAACTTTTCTAAAGCTCGATAGGGTCTTC  
TTGTCTTTAATTATATCTGGACTTTTTACCCAAAAATAAAATTCTAAATAATCTAAAA  
GAGACAGATATATTCTGTCAAACCATTCATTCCAGCCTTCAATTATAAGGCAAGTGATT  
ATGCTACCTTTCACGGTCAGAGTACCGCGGCCGTT-TAAAA-CACTGGGCAGGTCCGAC  
TTCGTATNNNNN-NNNNNNNNNNNNNNNNNNNNNNNNNNNTTGGAATATGATCCGGGTAGT  
TGGAAGTCTTTAAGATTATTAATTCGTGCGGAGTTAGGGCAGCCAGGTGCTTTGCTTGG  
AGATGATCAGCTATATAATGTAATTGTAAACGGCCCATGCTTTTGTATAATTTTTTCTT  
AGTAATACCTATGATGATTGGGGGTTTTGGAAATTGATTAGTGCCTTAATATTAGGGGC  
TCCAGATATAGTATTTCCACGTTTAAATAATATAAGTTTCTGACTTCTCCCCCTGCGCT  
TTTACTTCTTTTGTCTGCTCAGCTGCGGTAGAAAGTGGTGTTGGTACAGGATGGACTGTATA  
TCCCCCTTTATCTGGAAATTTGGCTCATGCTGGCGGGTCTGTAGATCTGGCAATTTTTTC  
TTTACATCTTGCTGGAGTGTCTTCTATTTTAGGAGCGGTGAATTTCACTACTACAATTAT  
TAATATGCGATGACAAGGAATAAAATTTGAGCGTCTTTCGTTGTTGTCTGATCGGTAA  
AATTACAGCTATTTTACTTCTTTTATCTTTACCTGTGTTGGCGGGTGCAATTACTATACT  
TCTAACTGATCGAAATTTTAATACTGCTTCTTTGATCCAGCGGGAGGTGGCGATCCTAN  
NNNNNNNNNNNNNNNNNNNNNN

>pergrandis

AACCAAGAAATTTAGTCATTCTTTTATGGTAAAAAGACAGTTAGGCAGA-TAAAATCATT  
AGACCTTTAATAGAGGAGTAAATCTATATATTAAGTTATATCTAATGTGGTTT-ATT  
TATGTTGAATCTGTGATAGCTTTAAGGGAACTGGGATTGGATACCCATTATTTTAGT  
CGTAAATTTAGTT--TAAGCTTACCGGAGTACTACGAATGTTTAAACTCAAAGAGCTTG  
GCGGTGTTTTAGACCCCTCAGGGGAACCTGTCTCGTAATCGACAATCCACGTTAGACCTA  
ACCCTTTATGGTCAAACAGCCTGTATACCGTCGTCGTCAGGTAACCTCTTAAAATATAGT  
AGTTAGCTCGAGAATT--TT-ATTAATTAACGTCAGATCAAGGTGCAGCTAATGAAAG  
GGCGAGGATGGGTACAATTATATTTGTAAATACGACATT-TGAAATGAAGTGCTTA  
AAGGAGGACTTGAAAGTAATTTGATTATATAACGGAATGAATAGGGCTCTGAAACGTG  
CAGAATTTAATGGTCGAACAGACCAACCCTTAAAGACTTCTGCATCTTTAGGACATTCT  
GGTCCAACATCGAGGTCACAAACCTTTTTTCGATATGGGCTCTTGAAAAAGATAATGCT  
GTTATCCCTACGGTAACTATTTCTTCGATCAAAATTTT-TGGATCAAC-ACAAGCAAGA  
TTTA-AAAGGAGGCTCTATTTGCTCCTCGGTTGCCCAACCAAAGT--ATTTAATAGTTT  
T-TCTTTTA-TTTAATTG--ATAAAGTCCATTAATTTTTCTGAAGCTCGATAGGGTCTTC  
TTGTCTTTAATAATATCTGGACTTTTTCATCCAAAAATAAAATTCTAAACAATCTAAAA

>brettinghami

```
>neocostatus
```

AACCAAGGAATTTAGTCATTCTTTTACGGTAAAAAGACAGTTAGGCAGA-TAGAGTCATT  
AGATCCTTAGTAAAGGAGTAAATCTATACTAAAAGTTATACCTAATATGATT-GTT  
TATGCTGAATCTGTGATAACTTTAAGGGAACTGGGATTGGATACCCCATTTTITAGT

TGTAAATTTAGTT--TAGGCTTACCAGAGTACTACGAATGTTTAAAACCTCAAAGGGCTTG  
GCGGTGTTTTAGACCTCTCAGGGGAACCTGTCTCATAATCGACAATCCACGTTAGACCTG  
ACCTTTAATGGTAATACAGCCTGTATACCGTCGTCAGGTAACCTTTTAAAAATACAGG  
AGTTAGCTCGAGAATT--GC-ATTAATTAAGACGTCAGATCAAGGTGCAGCTAATGAAAA  
GGTGAGGATGGGTTACAATTATATATTATAACCACGGCACT-TGAAATGAAGTGCTTA  
AAGGAGGACTTGAAAGTAATTTTGATTATATAAATAAAATGAATAGGGCTCTGAAACGTG  
CAGAATTTTAATGGTGAACAGACCAACCCTTAAAGACTTCTGCATCTTTAGGATATTCT  
GGTCCAACATCGAGGTCACAAACCTTTTTTCGATATGGGCTCTTGAAAAAGATAATGCT  
GTTATCCCTACGGTAACCTAATTCTTTGATCAAAATTCT-TGGATCAAC-ACAAGCAAGT  
TTTA-AAAGGAGGCTTTATTTACTCCTCGGTTGCCCCAACCAAAGT--ATTTAATAGTTT  
A-TCTTTTA-CTTAATTG--ATAAAGCCCATTAATTCTCTAAAGCTCGATAGGGTCTTC  
TTGTCTTTTAATAATATTTGGACTTTTTTCATCCAAAAATAAAATTCTAAACAATCTAAAA  
GAGACAGCTGTATTCTTGTCAAACCATTCAATCCAGCCTTCAATTATAAGGCAAATGATT  
ATGCTACCTTTGCACGGTCAGAGTACCGCGGCCGTT-TAAAA-CACTGGGCAGGTCCGAC  
TTCATATTTAAT-ATTGACATTACATTATATATTTTATTTGGGATATGATCTGGACTGGT  
TGGGACTGCTTTAAGGTTGTTAATTCGTGCAGAACTGGGACAACCAGGTGCTTTGCTTGG  
GGATGATCAGCTGTATAATGTAATTGTAACAGCGCATGCTTTTGTATAATTTTTTCTT  
AGTAATGCCTATAATGATTGGAGGTTTTGGAACTGATTAGTGCCATTGATGTTAGGGGC  
TCCAGACATGGTGTTTCCTCGTTAAATAATATAAGTTTCTGGCTTCTTCCTCCTGCACT  
TTTACTTCTTTGTCGTGAGCTGCAGTGGAAGTGGGGTAGGTACGGGATGGACTGTATA  
TCCACCGTTGGCAGGAAATCTAGCTCATGCTGGCGGTTCTGTAGATCTAGCAATTTTTTC  
TTTACATCTTGCTGGTGTGTCTTCTATTTTAGGGGCAGTAAATTTTATTACTACGATTAT  
TAATATACGATGACAGGGAATAAAATTTGAACGCTTTTCATTGTTTGTGTGGTCAGTAAA  
GATTACGGCTATTCTATTGCTTTTATCTTTACCGGTGTTAGCAGGTGCAATTACTATACT  
TTTAACGGATCGGAATTTAACACTGCCTTTTTTGATCCGGCAGGAGGTGGTGATCCTAT  
TTTGATCAGCATTTATTT

>rolani

AACCAAGGAATTTAGTCATTCTTTTATGGTAAAAAGACAGTTAGGCAGA-TATAGTCATT  
AGATCCTTAGTAAAGGAGTAAATCTACATACTAAAAGTTATACCGAATATGATTT-GTT  
TATGCTGAATCTGTGATAGCTTTAAGGGAACTGGGATTGGATACCCATTATTTTATG  
TGTAAATTTAGTT--TAGGCTTACCGGAGTACTACGAATGTTTAAAACCTCAAAGGGCTTG  
GCGGTGTTTTAGACCTCTCAGGGGAACCTGTCTCATAATCGACAATCCACGTTAGACCTA  
ACCTTTAATAGTAATACAGCCTGTATACCGTCGTCAGGTAACCTTTTAAAAATACAGC  
AGTTAGCTCGAGAATT--AT-ATTAATTAAGACGTCAGATCAAGGTGCAGCTAATGAAAA  
GGTGAGGATGGGTTACAATTATATATTATAACTACAGCACT-TGAAATTAAGTGCTTA  
AAGGAGGACTTGAAAGTAATTTTAATTATATAAGTAAAATGAATAGGGCTCTGAAACGTG  
CAGAATTTTAATGGTGAACAGACCAACCCTTAAAGACTTCTGCATCTTTAGGATATTCT  
GGTCCAACATCGAGGTCACAAACCTTTTTTCGATATGGGCTCTTGAAAAAGATAATGCT  
GTTATCCCTACGGTAACCTAATTCTTTGATCAAAATTCT-TGGATCAAC-ACAAGCAGGT  
TTTA-AAAGGAGGCTCTATTTACTCCTCGGTTGCCCCAACCAAAGT--ATTTAATAGTCT  
A-TCTTTTA-CTTAATTG--ATAAAGCCTATTAATTCTCTAAAGCTCGATAGGGTCTTC  
TTGTCTTTTAATAATATCTGGACTTTTTTCATCCAAAAATAAAATTCTAAGCAATCTAAAA  
GAGACAGCTGTATTCTTGTCAAACCATTCAATCCAGCCTTCAATTATAAGGCAAATGATT  
ATGCTACCTTTGCACGGTCAGAGTACCGCGGCCGTT-TAAAA-CACTGGGCAGGTCCGAC  
TTCATATTTAAT-ATTGACATTACATTGTATATTTTATTTGGTATATGATCTGGGTTGGT  
TGGAACTGCCCTAAGGTTGTTAATTCGTGCAGAACTAGGACAGCCAGGTGCTTTGCTTGG  
GGATGATCAATTGTATAATGTAATTGTAACAGCTCATGCTTTTGTATAATTTTTTCTT  
AGTAATACCTATAATGATTGGGGGTTTTGGAACTGATTAGTGCCGTTGATGTTAGGGGC

TCCAGATATAGTATTTCTCGTTTAAATAATATAAGTTTCTGGCTTCTTCCTCCTGCGCT  
TTTACTTCTTTTGTATCAGCCGCGGTAGAAAGTGGGGTAGGTACAGGATGGACTGTATA  
CCCGCCGTTAGCAGGAAATCTAGCTCATGCTGGCGGTTCTGTAGATCTAGCAATTTTTTC  
TTTACATCTTGCTGGTGTATCCTCTATTTTAGGGGCAGTAAATTTTATTACTACGATTAT  
TAATATACGATGACAGGGAATAAAATTTGAACGTCTTTCATTGTTTGTGTGGTCAGTAAA  
GATTACGGCTATTTTATTGCTTTTGTCTTACCAGTGTTAGCGGGTGCAATTACTATACT  
TCTGACTGATCGGAATTTTAACTGCCTTCTTTGATCCGGCAGGAGGTGGTGATCCTAT  
TTTGATCAGCATTTATTT

>sulcatus

AACCAAGGAATTTAGTCATTCTTTTATGGTAAAAAGACAGTTAGGCAGA-TAGAGTCATT  
AGATCCTTAGTAAAGGAGTAAATCTATACTAAAAGTTATGCCAAACATGATTT-GTT  
TGTGCTGAATCTGTGATAACTTTAAGGGAACTGGGATTGGATACCCCATTTTATTTAGT  
TGTAATTTAGTT--TA-GCTTACCGGAGTACTACGAATGTTTAACTCAAAGGGCTTG  
GCGGTGTTTTAGACCTCTCAGGGGAACCTGTCTCATAATCGACAATCCACGTTAGACCTA  
ACCTTTAATAGTAACACAGCCTGTATACCGTCGTCGTCAGGTAACCTTTTAAAAACACAGT  
AGTTAGCCCGAGAATT--AT-ATTAATTAAGACGTCAGATCAAGGTGCAGCTAATGAAAA  
GGTGAGGATGGGTTACAATTATATTTATAACTACGGCACT-TGAAATGAAGTGCTTA  
AAGGAGGACTTGAAAGTAATTTTGATTATATAAATAAAATGAATAGGGCTCTGAAACGTG  
CAGAATTTAATGGTCGAACAGACCAACCCTTAAGACTTCTGCATCTTTAGGATATTCT  
GGTCCAACATCGAGGTCACAAACCTTTTTTCGATATGGGCTCTGAAAAAGATAATGCT  
GTTATCCCTACGGTAACATAATCCTTTGATCAAAATTCT-TGGATCAAC-ACAAGCAAGT  
TTTA-AGAGGAGGCTTTATTTACTCCTCGGTTGCCCAACCAAAGT--ATTTAATAGTTT  
A-TCTTTTA-CTTAATTG--A-AAAGTCTATTAATTCTTCTAAAGCTCGATAGGGTCTTC  
TTGCTTTTAATAGTATTTGGACTTTTTCATCCAAAATAAAATTCTAAACAATCTAAAA  
GAGACAGCTGTATCTTGTCAAACCATTCAATCCAGCCTTCAATTATAAGGCAAATGATT  
ATGCTACCTTTGCACGGTCAGAGTACCGCGGCCGTT-TAAAA-CACTGGGCAGGTCCGAC  
TTCATATNNNNN-NNNNNNNNNTACATTGTATATCTTATTTGGAATATGATCCGGATTGGT  
TGGAAGTCTTTAAGGTTGTTAATTCGTGCAGAACTAGGACAGCCAGGTGCTTTGCTTGG  
GGACGATCAGTTGTATAATGTAATTGTAACAGCACATGCTTTTGTATAATTTTTTCTT  
AGTAATGCCTATAATGATTGGGGGTTTTGGAAATTGATTAGTGCCGTTAATATTAGGGGC  
TCCAGATATAGTATTTCTCGTTTAAATAATATAAGTTTTTGGCTTCTCCCTCCTGCGCT  
TTTACTTCTTTTGTATCAGCTGCAGTGGAAGCGGGGTAGGCACGGGATGGACTGTATA  
TCCGCCGTTAGCAGGAAATCTGGCTCATGCTGGCGGTTCTGTAGATCTAGCGATTTTTTC  
TTTACATCTTGCTGGTGTATCTTCTATTTTAGGGGCGGTAAATTTTATTACTACGATTAT  
TAATATACGATGACAGGGAATAAAATTTGAACGTCTTTCATTATTTGTATGATCAGTAAA  
AATTACGGCTATTTTATTGCTTTTATCCTTACCAGTGTTAGCGGGGGCAATTACTATACT  
TCTGACTGATCGGAATTTTAACTGCCTTTTTTGTATCCTGCAGGAGGTGGTGACCCTAT  
TTTGATCAGCATTTATTT

>bocki

AACCAAGGAATTTAGTCATTCTTTTATGGTAAAAAGACAGTTAGGCAGA-TGAAATCATT  
GGATCCTTAGTAAAGGAGTAAATCTATACTAAAAGTTATACCGGATATGGTTT-GTT  
TGTGTTGAATCTGTGATAGCTTTAAGGGAACTGGGATTGGATACCCCATTTTATTTAGT  
TGTAATTTAGTT--TAGGCTTACCAGAGTACTACGAATGTTTAACTCAAAGGGCTTG  
GCGGTGTTTTAGACCTCTCAGGGGAACCTGTCTCATAATCGACAATCCACGTTAGACCTA  
ACCTTTTATGGTAATACAGCCTGTATACCGTCGTCGTCAGGTAACCTTTTAAAGTACAGA  
AGTTAGCTCGAGAATT--AT-ATGAATTAAGACGTCAGATCAAGGTGCAGCTAATAAGAA  
GGTGAGGATGGGTTACAATTATATTTATAACTACGGCATT-TGAAATGAAGTGCTTA  
AAGGAGGACTTGAAAGTAATTTTGATTATATAAATAAAATGAATAAGGCTCTGAAACGTG

CAGAATTTTAATGGTCGAACAGACCAACCCTTAAAGACTTCTGCATCTTTAGGATATTCT  
GGTCCAACATCGAGGTCACAAACCTTTTTTCGATATGGGCTCTTAAAAAGATAATGCT  
GTTATCCCTACGGTAACTAATTCTTTGATCAAAATCCT-TGGATCAAC-ACAAGCAGGT  
CTTA-AAAGGAGGCTTTATTTACTCCTCAGTTGCCCCAACCAAAGT--ATTTAATGGTCT  
A-TCTTTTA-CTTAATTG--ATAAAGTCCATTAACTCTTCTAAAGCTCGATAGGGTCTTC  
TTGTCTTTTAATAGTATCTGGACCTTTTCATCCAAAAATAAAATTCTAAATAGTCTAAAA  
GAGACAGCTGTATTCTTGTCAAACCATTCAATCCAGCCTTCAATTATAAGGCAAATGATT  
ATGCTACCTTTGCACGGTCAGAGTACCGCGGCCGTT-TAAAA-CACTGGGCAGGTCCGAC  
TTCATATTTAAT-GCTGACATTACATTGTATATTTTATTTGGTATGTGATCTGGATTGGT  
TGGAAGTCTTTAAGGTTGTTAATTCGTGCAGAATTAGGACAACCAGGTGCTTTGCTTGG  
GGATGATCAATTATATAATGTGATTGTAACAGCGCATGCTTTTGTATAATTTTTTTTTT  
AGTAATGCCTATAATGATTGGGGGATTGGAAACTGGTAGTACCGTTGATGTTAGGGGGC  
TCCAGATATAGTATTTCTCGTTTGAACAACATAAGTTTTTGGCTTCTCCTCCTGCACT  
TTTACTTCTTTGTATCAGCTGCAGTGGAAAGTGGGGTGGTACAGGATGGACTGTGTA  
TCCACCATTAGCAGGAAATCTGGCTCATGCTGGCGGTTCTGTAGACCTGGCAATTTTTTC  
TCTACATCTTGCTGGTGTATCTTCTATTTTAGGAGCAGTAAATTTTATTACTACAATTAT  
TAATATACGATGACAGGGAATAAAATTTGAACGTCTTTCATTGTTTGTATGGTCAGTAAA  
GATTACAGCTATTTTATTGCTCTTGTCTTACCTGTATTAGCGGGTGCAATTACCATACT  
TCTAACTGATCGGAATTTTAATACTGCTTCTTTGATCCAGCAGGAGGTGGTGATCCTAT  
TTTGATCAGCATTTATTT

>bruuni

AACCAAGAAATTTAGTCATTCTTTTATGGTAAAAAGACAGTTAGGCAAA-TAAAATCATC  
AGATCTCTAGTAAAGGAGTAAATCTAAATACTAAGAGTTATACCGAACATGGTTT-ATT  
TATGTTGAGTCTGTGACAGCTTTAAGGGAACTGGGATTGGATACCCATTATTTTAGT  
TATAAATTTAGTT--TAAGCTTACCGGAGTACTACGAATGTTTAAACTCAAAGAGCTTG  
GCGGTGTTTTAGACCTCTCAGGGGAACCTGTCTCGTAATCGACAATCCACGTTAAACCTA  
ACCTTTTATAGTGATACAGCCTGTATACCGTCGTCAGGTAACCTCTTAAAAATAGT  
AGTTAGCTTGAGAATT--TA-ATTAATTAACCGTCAGATCAAGGTGCAGCTAATAAAGA  
GGTGAGGATGGGTACAATTACATATTTGTAAATACGGTACT-TGAAATGAAGTGTGTTGG  
AAGGAGGACTTGAAAGTAATTTTATTATATAAACACAATGAATAAGGCTCTGAAACGTG  
CAGAACTTTAATGGTCGAACAGACCAACCCTTAAAGACTTCTGCATCTTTAGGATATTCT  
GGTCCAACATCGAGGTCACAAACCTTTTTTCGATATGGGCTCTTAAAAAGATAATGCT  
GTTATCCCTACGGTAACTAATTCTTTGATCAAAATTAT-TGGATCAAC-ACAAGTAGGA  
CTTA-AAAGGAGGCTCTATATGCTCCTCGGTTGCCCCAACCAAAGT--ATTTAATAGTTT  
TATTTTTTA-CCTAATTA--ATTAAACCTATTAATTTTTCTGAAGCTCGATAGGGTCTTC  
TTGTCTTTTACTAGTATTTGGACTTTTTTCATCCAAAAATAAAATTCTAAATATTCTAAAA  
GAGACAGCTGTATTCTTGTCAAACCATTCAATCCAGCCTTCAATTATAAGGCAAATGATT  
ATGCTACCTTTGCACGGTCAGAGTACCGCGGCCGTT-TAAAA-CACTGGGCAGGTCCGAC  
TTCGTATCTGGT-GCTCACACNNNNNNATATATCTTATTTGGAATATGATCAGGATTAGT  
AGGGACTGCTTTAAGACTATTAATTCGTGCAGAATTAGGGCAACCCGGTGCTTTGCTTGG  
AGATGATCAGTTATATAATGTAATTGTAACGGCTCATGCTTTTGTATAATCTTTTTTTT  
AGTGATACCTATGATGATTGGGGGCTTTGGGAATTGGTAGTACCGTTGATGCTAGGGGGC  
TCCAGACATAGTATTTCTCGTTAAATAATATAAGTTTTTGGCTTCTGCCTCCTGCACT  
TTTACTCCTTTTATCTTCAGCTGCGGTAGAAAGTGGGGTAGGGACAGGATGGACTGTATA  
TCCACCATTATCAGGAAACCTAGCTCATGCTGGCGGTTCTGTAGATCTAGCAATTTTTTC  
CTTACATCTTGCTGGTGTCTTCTATTTTAGGGGCTGTAAATTTTATTACTACAATTAT  
TAATATACGATGACAGGGAATGAAATTTGAACGTCTTTCCTTGTGTTGTATGGTCAGTAAA  
AATTACGGCTATCTTGCTCTTTTATCCCTACCTGTTTTAGCGGGGGCAATTACTATACT

TCTAACTGATCGAAATTTCAATACTGCATTTTTTATCCGGCAGGAGGTGGTGATCCTAT  
TTTATATCAGCATTTGTTT

>kinoshitai

AACCAAGAAATTTAGTCATTCTTTTATGGTAAAAAGACAGTTAGGCAAA-CGAAATCATT  
AGATCTTTAGTAAAGGAGTAAAATCTAAATACTAAAAGTTATACCAAACATGATTT-ATT  
TATGTTGAGTCTGTGACAGCTCTAAGGGAAACTGGGATTGGATACCCCATTTTATTTAGT  
TATAAATTTAGTT--TAAGCTTACCGGAGTACTACGAATGTTTAAAACCTCAAAGAGCTTG  
GCGGTGTTTTAGACCTCTCAGGGGAACCTGTCTCGTAATCGACAATCCGCGTTAAACCTA  
ACCTTTTATAGTAATACAGCCTGTATACCGTCGTCGTCAGGTAACCTCTAAAAATGTAGT  
AGTTAGCTTGAGAACT--TA-ATTAGTTAAAACGTCAGATCAAGGTGCAGCTAATGAAGA  
GGTGAGGATGGGTTACAATTACATATTTGTAAATACGGCACT-ATAAATGAAGTGTTAG  
AAGGAGGACTTGAAAGTAATTTTGATTACATAAACACAATGAATAAGGCTCTGAAACGTG  
CAGAATTTTAAATGGTCGAACAGACCAACCCTTAAAGACTTCTACATCTTTAGGATATTCT  
GGTCCAACATCGAGGTCACAAACCTTTTTTTCGATATGGGCTCTTGAAAAAGATAATGCT  
GTTATCCCTACGGTAACTAATTCCTTTGATCAAAATTGT-TGGATCAAT-ACAAGTAGGA  
CTTA-AAAGGAGGCTCTATATACTCCTCGGTTGCCCCAACCAAAGT--ATTTAATAGTTT  
TATCTTTTA-CTTAATCA--AT-AAACCTACCAATTTTTCTGAAGCTCGATAGGGTCTTC  
TTGTCTTTTACTAATATTTGGACTTTTTTCATCCAAAAATAAAATTCTAAACATTCTAAAA  
GAGACAGCTGTATTCTTGTCAAACCATTCAATCCAGCCTTCAATTATAAGGCAAATGATT  
ATGCTACCTTTCACGGTCAGAGTACCGCGGCCGTT-TAAAA-CACTGGGCAGGTCCGAC  
TTCGTATTTAGT-GTCTACACGACACTATATATCTTATTTGGGATATGATCGGGATTAGT  
GGGGACTGCTTTAAGACTATTAATCCGTGCAGAATTAGGGCAACCCGGTGCTTTGCTTG  
AGATGATCAATTATATAATGTAATTGTGACGGCTCACGCTTTTGTATAATCTTTTTTT  
AGTAATACCTATAATGATTGGTGGTTTTGGGAATTGGTTAGTACCGTTGATGTTAGGAGC  
TCCGGATATAGTATCCCTCGTCTAAATAATATAAGTTTTGACTTCTTCCTCCTGCACT  
TTTACTTCTTTTATCTTCGGCTGCGGTAGAAAGCGGGGTAGGCACAGGATGAACTGTATA  
TCCGCCACTATCGGGAAATTTAGCTCATGCTGGTGGTTCTGTAGATCTAGCAATTTTTTC  
CTTGACCTTGCTGGGGTTTCTTCTATTTTAGGGCGGTAACTTTATTACTACAATTAT  
TAATATACGATGACAGGGAATGAAATTTGAACGCTTTTCATTGTTTCGTATGATCAGTAA  
AATTACAGCTATCTTGCTTCTTTTGTCTTTGCCTGTTTTGGCGGGCGCAATTACTATACT  
TCTAACTGATCGAAATTTCAATACTGCATTTTTTATCCGGCAGGAGGCGGTGATCCTAT  
CTTATATCAGCATTTATTT

>achatinus

AACCAAGAAATTTAGTCATTCTTTACGGTAAAAAGACAGTTAGGCAAA-TGAAATTATT  
GGATCTTTAGTAAAGGAGTAAAATCTAAATACTAAAAGTTATACCAGATATAATTT-ATT  
TATGTTGAATCTGTGACAGCTTTAAGGGAAACTGGGATTGGATACCCCATTTTATTTAGT  
TATAAATTTAGTT--TAAGCTTACCAGAGTACTACGAATGTTTAAAACCTCAAAGGGCTTG  
GCGGTGTTTTAGACCTCTCAGGGGAACCTGTCTCGTAATCGACAATCCACGTTAAACCTA  
ACCTTTTGTAGTAATACAGCTTGTATACCGTCGTCGTCAGGTAACCTCTTAAAAATAGT  
AGTTAGCTTGAGAAAT--TC-ATTAATTAACGTCAGATCAAGGTGCAGCTAATGAAGA  
GGTGAGGATGGGTTACAATTACATATTTGTAAACACGGTGCT-TGAAATGGAGTATTTTA  
AAGGAGGACTTGAAAGTAATTTTGATTATATAAGCAGAATGAATAAGGCTCTGAAACGTG  
TAGAATTTTAAATGGTCGAACAGACCAACCCTCAAAGACTTCTGCATCTTTAGGATATTCT  
GGTCCAACATCGAGGTCACAAACCTTTTTTTCGATATGAGCTCTCAAAAAAGATAATGCT  
GTTATCCCTACGGTAACTAATTTCTTTGATCAAAATTCC-TGGATCAAC-ACAAGTAAGA  
CTCA-AAAGGAGGCTTTATTTACTCCTCGGTTGCCCCAACCAAAGT--ATTTAATAGCTA  
TGTCTTTTA-CTTAATTA--ATAAAATCTACTAATTTCTCTAAAGCTCGATAGGGTCTTC  
TTGTCTTTTAAATAATATTTGGACTTTTTTCATCCAAAAATAAAATTCTAAACAATCTAAAA

GAGACAGCTGCATTCTTGTCAAACCATTTCATTCCAGCCTTCAATTATAAGGCAAATGATT  
ATGCTACCTTTGCACGGTCAGAGTACCGCGGCCGT-TAAAATCACTGGGCAGGTCCGAC  
TTCGTATT-AGA-TCTCACACTACATTGTACATTTTATTTGGAATATGATCAGGACTAGT  
AGGGACTGCTTTAAGGTTGTTGATTTCGTGCGGAATTAGGGCAGCCTGGTGCTTTGCTTGG  
GGACGATCAGTTATATAACGTAATTGTAACGGCGCATGCCTTTGTTATAATTTTCTTTT  
AGTAATGCCTATAATGATTGGGGGGTTTGAAATTGATTAGTACCTTTGATATTAGGAGC  
TCCAGACATAGTATTTCTCGCTTAAATAATATGAGTTTCTGGCTTCTCCTCCTGCGCT  
TTTACTTCTTTTGTCTCGGCTGCGGTGGAAAGAGGGGTAGGTACTGGATGGACTGTATA  
TCCACCTCTTGCAGGAAATCTAGCTCATGCTGGTGGTTCTGTAGATCTTGCAATTTTTTC  
TTTACATCTTGCTGGGGTATCTTCTATTTTAGGGGCTGTAACTTTATTACTACAATTAT  
TAACATACGGTGACAAGGGATGAAATTTGAGCGTCTTTCATTGTTTCGTGTGATCGGTGAA  
GATTACGGCTATTTTACTTCTTTTGTCTTTACCTGTTTTGGCAGGGGCTATTACTATACT  
TTTGACTGATCGAAATTTCAATACTGCTTCTTTGACCCAGCAGGAGGTGGTGATCCTAT  
TTGTATCAGCATCTTTTC

>monachus

AACCAAGAAATTTAGTCATTCTTTACGGTAAAAAGACAGTTAGGCAAA-TGAAATTATC  
GGATCTTTAGTAAAGGAGTAAATCTAAATACTAAAAGTTATACCAAATATAATTT-ATT  
TATGTTGAATCTGTGACAGCTTTAAGGGAACTGGGATTGGATACCCATTATTTTAGT  
TATAAATTTAGTT--TAAGCTTACCAGAGTACTACGAATGTTTAAACTCAAAGGGCTTG  
GCGGTGTTTTAGACCTCTCAGGGGAACCTGTCTCGTAATCGACAATCCACGTTAAACCTA  
ACCTTTTGTAGTAATACAGCTTGTATACCGTCGTCGTCAGGTAACCTCTTAAATATAGT  
AGTTAGCTTGAGAATT--TC-ATTAATTAACGTCAGATCAAGGTGCAGCTAATGAAGA  
GGTGAGGATGGGTACAATTACATATTTGTAAATACGGTGCT-TGAAATGGAGTATTTTA  
AAGGAGGACTTGAAAGTAATTTTGATTATATAAGCGGAATGAATAAGGCTCTGAAACGTG  
CAGAATTTAATGGTCGAACAGACCAACCCTCAAAGACTTCTGCATCTTTAGGATATTCT  
GGTCCAACATCGAGGTCACAAACCTTTTTTCGATATGAGCTCTCAAAAAGATAATGCT  
GTTATCCCTACGGTAACTAATTTCTTTGATCAAAATTCC-TGGATCAAC-ACAAGTAAGA  
CTCA-AAAGGAGGCTTTATTTACTCCTCGGTTGCCCCAACCAAAGT--ATTTAATAGCTA  
TGTCTTTTA-CTTAATTA--ATAAAATCTATTAATTTCTCTAAAGCTCGATAGGGTCTTC  
TTGTCTTTTAATAATATTTGGACTTTTTCATCCAAAATAAAATTCTAAACAATCTAAAA  
GAGACAGCTGTATTCTTGTCAAACCATTTCATTCCAGCCTTCAATTATAAGGCAAATGATT  
ATGCTACCTTTGCACGGTCAGAGTACCGCGGCCGT-TAAAACCACTGGGCAGGTCCGAC  
TTCATATT-AGA-TCTCACACTACATTGTACATTTTATTTGGAATATGATCAGGACTAGT  
AGGGACTGCTTTAAGGTTGTTGATTTCGTGCGGAATTAGGGCAGCCTGGTGCTTTGCTTGG  
GGACGATCAGTTATATAATGTAATTGTAACGGCGCATGCCTTTGTTATAATTTTCTTTT  
AGTAATACCTATAATGATTGGGGGGTTTGAAATTGATTAGTACCTTTGATATTAGGAGC  
TCCAGACATAGTATTTCTCGCTTAAATAATATGAGTTTCTGGCTTCTCCTCCTGCGCT  
TTTACTTCTTTTGTCTCGGCTGCGGTGGAAAGAGGGGTAGGTACTGGATGGACTGTATA  
TCCACCTCTTGCAGGAAATCTAGCTCATGCTGGTGGTTCTGTAGATCTTGCAATTTTTTC  
TCTACATCTTGCTGGAGTATCTTCTATTTTAGGGGCTGTAACTTTATTACTACAATTAT  
TAACATACGGTGACAAGGGATGAAATTTGAGCGTCTTTCGTTGTTTCGTGTGATCGGTGAA  
GATTACGGCTATTTTACTTCTTTTGTCTTTACCTGTTTTGGCAGGGGCTATTACTATACT  
TTTGACTGATCGAAATTTCAATACTGCTTCTTTGACCCAGCAGGAGGTGGTGATCCTAT  
TTGTATCAGCATCTTTTC

>simonis

AACCAAGAAATTTAGTCATTCTTTACGGTAAAAAGACAGTTAGGCAAA-TGAAATTATC  
GGATCTTTAGTAAAGGAGTAAATCTAAATACTAAAAGTTATACCAGATATAATTT-ATA  
TATGTTGAATCTGTGACAGCTTTAAGGGAACTGGGATTGGATACCCCATTTTATTTAGT



TATAAATTTAGTT--TAAGCTTACCAGAGTACTACGAATGTTTAAAACCTCAAAGGGCTTG  
GCGGTGTTTTAGACCTCTCAGGGGAACCTGTCTCGTAATCGACAATCCACGTTAAACCTA  
ACCTTTTGTAGTAATACAGCTTGTATACCGTCGTCAGGTAACCTCTTAAATATAGT  
AGTTAGCTTGAGAATT--TA-ATTAATTAACGTCAGATCAAGGTGCAGCTAATGAAGA  
GGTGAGGATGGGTTACAATTACATATTTGTAAACACGGTGCT-TGAAATGGAGTATTTTA  
AAGGAGGACTTGAAAGTAATTTTGATTATATAAACAGAATGAATAAGGCTCTGAAACGTG  
CAGAATTTTAATGGTCGAACAGACCAACCCTCAAAGACTTCTGCATCTTTAGGATATTCT  
GGTCCAACATCGAGGTCACAAACCTTTTTTCGATATGAGCTCTCAAAAAGATAATGCT  
GTTATCCCTACGGTAACCTAATTTCTTTGATCAAAATTCC-TGGATCAAC-ACAAGTAAGA  
CTCA-AAAGGAGGCTTTATTTACTCCTCGGTTGCCCCAACCAAAGT--ATTTAATAGCTA  
TGTCTTTTA-CTTAATTA--ATAAAATCTACTAATTTCTCTAAAGCTCGATAGGGTCTTC  
TTGTCTTTTAATAATATTTGGACTTTTTCATCCAAAATAAAATTCTAAACAATCTAAAA  
GAGACAGCTGCATTCTTGTCAAACCATTCAATCCAGCCTTCAATTATAAGGCAAATGATT  
ATGCTACCTTTCACGGTCAGAGTACCGCGGCCGT-TAAAATCACTGGGCAGGTCCGAC  
TTCGTATT-AGA-TCTCACACNNNNNNNNNNNNNNCTATTTGGAATATGATCGGGATTAGT  
AGGAACTGCTTTAAGGTTGTTGATTTCGTGCGGAATTAGGGCAGCCTGGTGCTTTGCTTGG  
GGATGATCAATTATATAACGTAATTGTAACGGCGCATGCCTTTGTTATAATTTTTTTTTT  
AGTAATGCCTATGATGATTGGTGGGTTTGAAATTGATTAGTACCTTTGATATTAGGAGC  
TCCAGACATAGTATTTCTCGCTAAATAATATAAGTTTTGGCTTCTCCCCCGCGCT  
TTTACTTCTTTATCTTCGGCTGCGGTGGAAGGGGGGTAGGTACTGGGTGGACTGTATA  
TCCACCTCTTGCAAGAACTAGCTCATGCTGGTGGTTCTGTAGATCTTGAATTTTTTC  
TTTACATCTTGCTGGGGTATCTTCTATTTTAGGGGCTGTAAATTTTATTACCACAATTAT  
TAATATACGGTGACAAGGAATGAAATTTGAGCGTCTTTCATTATTTGTGTGATCGGTGAA  
GATTACGGCTATTTTACTTCTTTTATCTTTACCTGTTCTGGCAGGGGCTATTACTATGCT  
TTTGAATGATCGAAATTTAATACTGCTTCTTTGACCCAGCAGGAGGTGGTGATCCTGT  
TTTGTACCAGCATCTTTT

>magus

AACCAAGAAATTTAGTCATTCTTTACGGTAAAAAGACAGTTAGGCAAA-TGAAATTATT  
GGATCTTTAGTAAAGGAGTAAATCTGAATACTAAAAGTTATACCAGATATAGTTT-ATT  
TATGTTGAATCTGTGACAGCTTTAAGGGAACTGGGATTGGATACCCATTATTTTAGT  
TATAAATTTAGTT--TAAGCTTACCAGAGTACTACGAATGTTTAAAACCTCAAAGGGCTTG  
GCGGTGTTTTAGACCTCTCAGGGGAACCTGTCTCATAATCGACAATCCACGTTAAACCTA  
ACCTTTTGTAGTAATACAGCTTGTATACCGTCGTCAGGTAACCTCTTAAATATAGT  
AGTTAGCTTGATAATT--TG-ATTAATTAACGTCAGATCAAGGTGCAGCTAATGAAAA  
GGTGAGGATGGGTTACAATTACATATTTGTAAATACGGTGCT-TGAAATGAAGTATCTTA  
AAGGAGGACTTGAAAGTAATTTTGATTATATAAGCAGAATGAATAAGGCTCTGAAACGTG  
CAGAATTTTAATGGTCGAACAGACCAACCCTTAAAGACTTCTGCATCTTTAGGATATTCT  
GGTCCAACATCGAGGTCACAAACCTTTTTTCGATATGAGCTCTCAAAAAGATAATGCT  
GTTATCCCTACGGTAACCTAATTTCTTTGATCAAAATTC-TGGATCAAC-ACAAGTAAGA  
CTCA-AAAGGAGGCTTTATTTACTCCTCGGTTGCCCCAACCAAAGT--GTTAATAGTTA  
TGTCTTTTA-CTTAATGA--ATAAAATCTATTAATTTCTCTAAAGCTCGATAGGGTCTTC  
TTGTCTTTTAATAACATTTGGACTTTTTCATCCAAAATAAAATTCTAAACAATCTAAAA  
GAGACAGCTGTATTCTTGTCAAACCATTCAATCCAGCCTTCAATTATAAGGCAAATGATT  
ATGCTACCTTTCACGGTCAGAGTACCGCGGCCGT-TAAAATCACTGGGCAGGTCCGAC  
TTCGCATT-AAA-CTTTACACGACATTGTACATTCTATTTGGAATATGATCGGGACTAGT  
AGGGACTGCTTTAAGGTTGTTGATTTCGTGCGGAATTAGGGCAACCTGGTGCTTTGCTTGG  
GGATGATCAGTTATATAATGTAATTGTAACGGCGCATGCCTTTGTTATAATTTTTTTTTT  
AGTAATGCCTATGATAATTGGGGGGTTTGAAATTGATTAGTACCTTTGATATTAGGAGC

TCCAGACATAGTATTTCTCGCTTAAATAATATGAGTTTTTGGCTTCTTCCTCCTGCACT  
TTTACTTCTTTTGTCTCGGCTGCACTGGAAAGGGGGTAGGTACTGGATGGACTGTATA  
TCCACCTCTTGCAGGAAATCTAGCTCATGCTGGTGGTTCTGTAGATCTTGCAATTTTTTC  
TTTACATCTTGCTGGGGTATCTTCTATTTTAGGAGCTGTAACTTTATTACCACAATTAT  
TAATATACGGTGACAAGGAATGAAATTTGAGCGTCTTTCGTTATTTGTGTGATCGGTGAA  
GATTACGGCTATTTTACTTCTTTTATCTTTACCTGTTTTGGCAGGGGCTATTACTATACT  
TTTGACTGATCGAAATTTTAATACTGCTTCTTTGATCCAGCAGGAGGTGGTGATCCTAT  
TTTGTACCAACATCTTTTC

> consors

AACCAAGAAATTTAGTCATTCTTTACGGTAAAAAGACAGTTAGACAAA-TTAAATTATT  
GGATCTTTAGTAAAGGAGTAAATCTAAATACTAGAAGTTATACCAGATATAGTTT-ATT  
TATGTTGAATCTGTGACAGCTTTAAGGGAACTGGGATTGGATACCCCATTTTATTTAGT  
TATAAATTTAGTT--TAAGCTTACCAGAGTACTACGAATGTTTAAACTCAAAGGGCTTG  
GCGGTGTTTTAGACCTCTCAGGGGAACCTGTCTCATAATCGACAATCCACGTTAAACCTA  
ACCTTTTGTAGTAATACAGCTTGTATACCGTCGTCGTCAGGTAACCTCTTAAATATAGT  
AGTTAGCTTGAGAAATT-TT-ATTAATTAACGTCAGATCAAGGTGCAGCTAATGAAAA  
GGTGAGGATGGGTTACAATTACATATTTGTAAACACGGTGCT-TGAAACGGAGTATTTTA  
AAGGAGGACTTGAAAGTAATTTTGATTATATAAGTGGAATGAATAAGGCTCTGAAACGTG  
CAGAATTTAATGGTCGAACAGACCAACCCTTAAGACTTCTGCATCTTTAGGATATTCT  
GGTCCAACATCGAGGTCACAAACCTTTTTTTCGATATGAGCTCTCAAAAAGATAATGCT  
GTTATCCCTACGGTAACATAATTTCTTTGATCAAAATTC-TGGATCAAC-ACAAGTAAGA  
CTCA-AAAGGAGGCTTTATTTACTCCTCGGTTGCCCCAACCAAAGT--ATTTAATAGCTA  
TGTCTTTTA-CTTAATTA--ATAAAATCTATTAATTTCTCTAAAGCTCGATAGGGTCTTC  
TTGTCTTTTAATAATATTTGGACTTTTTCATCCAAAATAAAATTCTAAACAATCTAAAA  
GAGACAGCTGTATTTCTGTCAAACCATTCATTCCAGCCTTCAATTATAAGGCAAATGATT  
ATGCTACCTTTGCACGGTCAGAGTACCGCGGCCGTT-TAAAATCACTGGGCAGGTCCGAC  
TTCGTATT-AGC-TTTTACACTACATTGTACATTCTATTTGGAATATGATCAGGACTAGT  
AGGGACTGCTTTAAGGTTGTTGATTTCGTGCGGAATTAGGGCAGCCTGGTGCTTTGCTTGG  
AGACGATCAGTTATATAATGTAATTGTAACGGGCGCATGCCTTTGTTATAATTTTCTTTT  
AGTAATGCCTATGATGATTGGGGGGTTTGAAATTGATTAGTACCTTTGATATTAGGAGC  
TCCAGACATAGTATTTCCCCGTTTAAATAATATGAGTTTTTGGCTTCTTCCTCCTGCACT  
TTTACTTCTTTTGTCTCGGCTGCGGTTGAAAGGGGGTAGGTACTGGATGGACTGTATA  
TCCACCTCTTGCAGGAAATCTAGCTCATGCTGGTGGTTCTGTAGATCTTGCAATTTTTTC  
TTTACACCTTGCTGGAGTATCTTCTATTTTAGGGGCTGTAAATTTTATTACCACAATTAT  
TAATATACGGTGACAAGGGATGAAATTTGAGCGTCTTTCATTATTTGTGTGATCGGTAA  
GATCACGGCTATTTTACTTCTTTTATCTTTACCTGTTTTGGCAGGGGCTATTACTATACT  
TTTAACTGATCGAAATTTCAATACTGCTTCTTTGATCCAGCAGGAGGTGGTGATCCTAT  
CTTGATCAGCATCTTTT

> catus

AACCAAGAAATTTAGTCATTCTTTAATGGTAAAAAGACAGTTAGGCAAA-TGAAACTATT  
GGATCTTTAGTAGAGGAGTAAATCTAAATACTAAAAGCTACATCAAACATAGTTT-ATT  
TATGTTGAATCTGTGACAGCTTTAAGGGAACTGGGATTGGATACCCCATTTTATTTAGT  
TATAAATTTAGTT--TAAGCTTACCAGAGTACTACGAATGTTTAAACTCAAAGGGCTTG  
GCGGTGTTTTAGACCTCTCAGGGGAACCTGTCTCATAATCGACAATCCACGTTAAACCTA  
ACCTTTTATAGTAATACAGCTTGTATACCGTCGTCGTCAGGTAACCTCTTAAATATAGT  
AGTTAGCTTGAGAAATT-TG-ATTAATTAACGTCAGATCAAGGTGCAGCTAATGAAAA  
GGTGAGGATGGGTTACAATTACATATTTGTAAACACGGCACT-TGAAATGAAGCGTCTTA  
AAGGAGGACTTGAAAGTAATTTGGTTATATAGGCAGAATGAATAAGGCTCTGAAACGTG

CAGAATTTTAATGGTCGAACAGACCAACCCTTAAGACTTCTGCATCTTTAGGATATTCT  
GGTCCAACATCGAGGTCACAAACCTTTTTTCGATATGAGCTCTCAAAAAGATAATGCT  
GTTATCCCTACGGTAACATAATTCTTTGATCAAAAATTC-TGGATCAAC-ACAAGTAAGA  
CTTA-AAAGGAGGCTTTATCTACTCCTCGGTTGCCCCAACCAAAGT--ATTTAATAGTTA  
TGTCTTTTA-CTTAATTA--ATAAAATCTATTAATTTCTCTAAAGCTCGATAGGGTCTTC  
TTGTCTTTTAATAACATTTGGACTTTTTCATCCAAAGATAAAATTCTAAACAATCTAAAA  
GAGACAGCTGTATTCTTGTCAAACCATTCAATCCAGCCTTCAATTATAAGGCAAATGATT  
ATGCTACCTTTGCACGGTCAGAGTACCGCGGCCGTT-TAAAACCACTGGGCAGGTCCGAC  
TTCGTATT-AGC-TTTTACACTACATTGTATATTCTATTTGGAATATGATCGGGACTGGT  
AGGAACTGCTTTAAGGTTGTTGATTTCGTGCAGAATTAGGGCAACCTGGTGCTTTGCTTGG  
GGACGATCAGTTATATAATGTAATTGTAACGGCGCATGCCTTTGTTATAATTTTCTTTT  
AGTAATGCCTATGATGATTGGGGGGTTTGAAACTGATTGGTGCCTTTAATATTAGGAGC  
TCCAGATATAGTATTTCTCGTTTAAATAATATGAGTTTTTGGCTTCTCCTCCTGCACT  
TTTGCTTCTTTATCCTCGGCTGCGGTAGAAAGGGGAGTAGGTACCGGATGGACTGTATA  
TCCACCTCTTTCAGGAAATCTAGCTCATGCTGGTGGTCCGTAGATCTTGCGATTTTTTC  
TTTACACCTTGCTGGGGTATCTTCTATTTTAGGGGCGGTAAACTTTATTACTACAATCAT  
TAACATACGGTGACAAGGAGTGAAATTTGAACGTCTTTCGTTGTTTGTGTGATCGGTAAA  
GATTACGGCTATCTTGCTTCTTTATCTTTACCTGTTTTAGCTGGGGCAATTACTATACT  
TTTAACTGATCGAAATTTCAATACTGCTTTTTTTGACCCCGCAGGAGGTGGTGATCCTAT  
TTTGATCAACATCTTTTC

>leobottoni

AACCAAGAAATTTAGTCATTCTTTTACGGTAAAAAGACAGTTAGGCAAA-TAAAATTATT  
AGATCTTTAGTAGAGGAGTAAAATCTAAATACTAAAAGTTATATCAGGTATAGTTT-ATT  
TATGTTGAATCTGTGACACCTTTAAGGGAACTGGGATTGGATACCCATTATTTTAGT  
TATAAATTTAGTT--TAAGCTTACCAGAGTACTACGAATGTTTAAACTCAAAGGGCTTG  
GCGGTGTTTTAGACCTCTCAGGGGAACCTGTCTCATAATCGACAATCCACGTTAAACCTA  
ACCTTTTATAGTAATACAGTTTGTATACCGTCGTCGTCAGGTAACCTCTTAAAATCTAGT  
AGTTAGCTTGAGAATT--TG-GTTAATTAAACGTCAGATCAAGGTGCAGCTAATGAAAA  
GGTGAGGATGGGTACAATTATATTTGTAAATATGGTATT-TGAAATGAAGTATTTTA  
AAGGAGGACTTGAAAGTAATTTTGATTATATAAGTAAAATGAATAAGGCTCTGAAACGTG  
CAGAATTTTAATGGTCGAACAGACCAACCCTTAAGACTTCTGCATCTTTAGGATATTCT  
GGTCCAACATCGAGGTCACAAACCTTTTTTCGATATGAACTCTCAAAAAGATAATGCT  
GTTATCCCTACGGTAACATAATTCTTTTCATCAAAAATTT-TGGATCAAC-ACAAGTAAGA  
CTAC-AAAGGAGGCTTTATTTACTCCTCGGTTGCCCCAACCAAAGT--ATTTAATAGCTA  
TATCTTTTA-CTAAATCA--ATAAAACCTATTAATTTCTCTAAAGCTCGATAGGGTCTTC  
TTGTCTTTTAATAATATTTGGACTTTTTCATCCAAAATAAAATTCTAAACAATCTAAGA  
GAGACAGCCGTATTCTTGTCAAACCATTCAATCCAGCCTTCAATTATAAGGCAAATGATT  
ATGCTACCTTTGCACGGTCAGAGTACCGCGGCCGTT-TAAAATCACTGGGCAGGTCCGAC  
TTCGTATT-AGC-TTTTACACTACATTGTATATTCTATTCGGAATATGATCAGAGCTGGT  
AGGAACTGCTTTAAGGTTGTTGATTTCGTGCAGAGTTAGGGCAGCCTGGTGATTGCTTGG  
GGATGATCAGTTATATAATGTAATTGTAACAGCGCATGCTTTTGTATAATTTTTTTTTT  
AGTAATACCTATGATGATTGGAGGGTTTGAAATTGATTAGTACCTTTAATGTTAGGGGC  
TCCAGACATAGTATTTCTCGCTTGAATAATATGAGTTTTTGACTTCTCCTCCTGCACT  
TTTGCTTCTTTATCCTCGGCTGCAGTGGAAAGGGGGTAGGTACAGGATGGACTGTATA  
TCCCCCTCTTGCAAGGAAATCTAGCTCATGCTGGTGGTCTGTAGATCTTGCGATTTTTTC  
TTTACATCTTGCTGGGGTGTCTTCTATTTTAGGGGCGGTAAATTTTATTACTACAATTAT  
TAATATACGATGACAAGGGATGAAATTTGAGCGTCTTCTTTATTTGTGTGGTCCGTGAA  
GATCACGGCTATCTTGCTTCTTTATCTTTACCAGTTTTAGCGGGGGCTATTACTATACT

TTTAACTGATCGAAATTTTAATACTGCTTTTTTTGACCCAGCAGGAGGTGGTGATCCTAT  
TTTGTATCAACATCTTTTT

>striolatus

AACCAAGAAATTTAGTCATTCTTTTATGGTAAAAAGACAGTTAGGCAAA-TGAAATTACT  
GGATCTCTAGTAGAGGAGTAAAATCTAAATACTAAGAGTTATACCAGACGTAGTTT-ATT  
TATGTTGAATCTGTGACAGCTTTAAGGGAACTGGGATTGGATACCCCACTATTTCTAGT  
TATAAATTTAGTT--TAAGCTTACCAGAGTACTACGAATGTTTAAAACCTCAAAGGGCTTG  
GCGGTGTTTTAGACCTCTCAGGGGAACCTGTCTCATAATCGACAATCCACGTTAGACCTA  
ACCTTTTGTAGTAATACAGCTTGTATACCGTCGTCGTCAGGTAACCTCTTAAAATATAGT  
AGTTAGCTCGAGAATT--TG-ATTAATTAACCGTCAGATCAAGGTGCAGCTAATAAAAA  
GGTGAGGATGGGTACAATTATATTTATAAATACGGTACT-TGAAATGAAGTATCTTA  
AAGGAGGACTTGAAAGTAATTCTGATTATATAAACAGAATGAATAAGGCTCTGAAACGTG  
CAGAATTTTAATGGTCGAACAGACCAACCCTTAAAGACTTCTGCATCTTTAGGACATTCT  
GGTCCAACATCGAGGTCACAAACCTTTTTTTCGATATGAGCTCTCAAAAAGATAATGCT  
GTTATCCCTACGGTAACTAATTTCTTTAATCAAAATTCT-TGGATCAAT-ACAAGTAAGG  
CCTA-AAAGGAGGCTTTATTTACTCCTCGGTTGCCCCAACCAAAGT--GTTTAATAGCTA  
TGTCTTTTA-CTTGATTA--ATAAAATCTATTAATTTCTCTAAAGCTCGATAGGGTCTTC  
TTGTCTTTTAATAATATCTGGACTTTTTCATCCAAAAATAAAATTCTAAACAATCTAAAA  
GAGACAGCCGATTCTTGTCAAACCATTTCATCCAGCCTTCAATTATAAGGCAAATGATT  
ATGCTACCTTTCACGGTCAGAGTACCGCGGCCGT-TAAAACCACTGGGCAGGTCCGAC  
TTCGTATT-GAT-TTTTACACTACATTATATATCTTGTTTGAATATGATCAGGACTGGT  
GGGGACTGCTTTAAGGTTATTAATTCGTGCAGAGTTAGGACAGCCTGGTGCCTTGCTTGG  
GGATGATCAATTATATAATGTAATTGTGACGGCTCATGCTTTTGTATAATTTTTTTTTT  
AGTAATACCTATAATGATTGGGGGGTTTGAAATTGATTGGTACCTTTAATATTAGGGGC  
TCCAGATATAGTGTTTCCTCGCTTAAATAATATGAGTTTTTGGCTTCTCCTCCTGCGCT  
TTTACTCCTTTTATCTTCGGCTGCGGTGGAAAGGGGGGTAGGTACTGGATGGACTGTATA  
TCCTCCTCTAGCAGGGAATCTAGCTCATGCTGGTGGTTCTGTAGATCTTGCGATTTTTTC  
ATTACATCTTGCTGGGGTATCTTCTATTTTAGGGGCGGTAAATTTTATTACCACAATTAT  
TAATATACGATGACAAGGAATGAAGTTTGAGCGCCTTTCGTTATTCGTCTGATCAGTGAA  
GATCACGGCTATTTTACTTCTTTTATCTTTACCTGTTTTGGCGGGAGCTATTACTATACT  
TCTAACTGATCGAAATTTCAATACTGCTTCTTTGATCCAGCAGGAGGCGGTGATCCTAT  
TTTGTATCAGCATCTTTTT

>aurisiacus

NNNNNNNNNNNNNNNNNNNTTCTTTTATGGTAAAAAGACAGTTAGGCAGA-TGAGATTATT  
AGATCTTTAGTAAAGGAGTAAAATCTAAATACTAAAAGATACACCGGATATAATTT-ATT  
TATGTTGAATCTGTGACAGCTTTAAGGGAACTGGGATTGGATACCCCACTATTTTTAGT  
TATAAATTTAGTT--TAAGCTTACCGGAGTACTACRAATGTTTAAAACCTCAAAGGGCTTG  
GCGGTGTTTTAGACCTCTCAGGGGAACCTGTCTCGTAATCGACAATCCACGTTAAACCTA  
ACCTTTTATGGTAAACAGCTTGTATACCGTCGTCGTCAGGTAACCTCTTAAAATATAGT  
AGTTAGCTTGAGAATT--TA-ATTAATTAACCGTCAGATCAAGGTGCAGCTAATGAAAA  
GGTGAGGATGGGTACAATTATATTTATAAATACGGTACT-TGAAATGGAGTATCTTA  
AAGGAGGACTTGAAAGTAATTTTAATTATATAAATAGAATGAATAAGGCTCTGAAACGTG  
CNNNNNNNNNNNGGTGCAACAGACCAACCCTT-AAGACTTCTGCATCTTTAGGATATTCT  
GGTCCAACATCGAGGTCACAAACCTTTTTTTCGATACGGACTCTTAAAAAAGATAATGCT  
GTTATCCCTACGGTAACTAATTTCTTTGATCAAAATTCT-TGGATCAGC-GCAAGTAAGA  
CTTA-AAAGGAGGCTTTATTTACTCCTCGGTTGCCCCAACCAAAGT--ATTTAATAGTTA  
TGCTTTTAA-CTTAATTA--GTAAACCTATTAATTTTTCTAAAGCTCGATAGGGTCTTC  
TTGTCTTTTAATAATATCTGGACTTTTTCATCCAAAAATAAAATTCTAAACAATCAAAAA

GAGACAGCTGTATTCTTGTCAAACCATTCAATCCAGCCTTCAATTATAAGGCAAATGATT  
ATGCTACCTTTGCACGGTCAGAGTACCGCGGCCGT-TAAAACCACTGGGCAGGTCCGAC  
TTCGCATT-AAT-TTTTACACTACATTATATATTCTATTTGGGATATGATCAGGCTTGGT  
AGGGACTGCTTTAAGGCTATTAATTCGTGCAGAGTTAGGACAGCCAGGTGCTTTGCTTGG  
AGACGATCAGCTATATAATGTAATTGTGACGGCGCATGCTTTTGTATAATCTTCTTTT  
AGTAATGCCTATGATGATTGGGGGTTTTGGGAATTGATTGGTACCCTTGATATTAGGGGC  
TCCAGATATAGTATTTCTCGCTTAAATAACATGAGTTTTTGGCTTCTTCCCCCTGCACT  
TTTACTTCTTTTGTCTTCGGCTGCGGTAGAAAGAGGGGTAGGAACGGGATGAACTGTATA  
CCCACCTCTGGCAGGGAATCTTGCTCATGCTGGTGGTTCTGTAGATCTTGCAATTTTTTC  
TTTACACCTTGCTGGGGTATCTTCTATTTTAGGGGCTGTAACTTCATTACTACAATTAT  
TAACATACGATGACAGGGAATGAAGTTTGAGCGTCTCTCGCTGTTTGTGGATCGGTGAA  
GATCACGGCGATCTTACTTCTTCTATCCCTACCTGTTTTGGCGGGGGCTATTACTATGCT  
TTTAACTGATCGAAATTTCAATACTGCTTCTTTGATCCAGCAGGGGGTGGTGATCCTAT  
TTGTATCAGCACCTTTT

>gauguini

AACCAAGAAATTTAGTCATTCTTTATGGTAAAAAGACAGTTAGGCAGA-TGAGATTATT  
AGATCTTTAGTAAAGGAGTAAATCTAAATACTAAAAGATATACCGGACATAATTT-ATT  
TATGTTGAATCTGTGACAGCTTTAAGGGAACTGGGATTGGATACCCATTATTTTAGT  
TATAAATTTAGTT--TAAGCTTACCGGAGTACTACGAATGTTTAAACTCAAAGGGCTTG  
GCGGTGTTTTAGACCTCTCAGGGGAACCTGTCTCGTAATCGACAATCCACGTTAAACCTA  
ACCTTTTATGGTAAACAGCTTGTATACCGTCGTCAGGTAACCTCTTAAATATAGT  
AGTTAGCTTGAGAATT--TA-ATTAATTAACGTCAGATCAAGGTGCAGCTAATGAAAA  
GGTGAGGATGGGTACAATTATATTTATAAATACGGTACT-TGAAATGGAGTATCTTA  
AAGGAGGACTTGAAAGTAATTTAATTATATAAATAGAATGAATAAGGCTCTGAAACGTG  
CAGAATTTAATGGTCGAACAGACCAACCCTTAAAGACTTCTGCATCTTTAGGATATTCT  
GGTCCAACATCGAGGTCACAAACCTTTTTTCGATACGGGCTCTTAAAAAGATAATGCT  
GTTATCCCTACGGTAACATAATTTCTTTGATCAAAATTCC-TGGATCAAC-GCAAGTAAGA  
CTTA-AAAGGAGGCTTTACTTACTCTCGGTTGCCCCAACCAAAGT--ATTTAATAGTTA  
TGCTTTTA-CTTAATTA--GTAAACCTATCAATTTTCTAAAGCTCGATAGGGTCTTC  
TTGTCTTTAATAATATCTGGACTTTTTCATCCAAAAATAAAATTCTAAACAATCAAAAA  
GAGACAGCTGTATTCTTGTCAAACCATTCAATCCAGCCTTCAATTATAAGGCAAATGATT  
ATGCTACCTTTGCACGGTCAGAGTACCGCGGCCGT-TAAAACCACTGGGCAGGTCCGAC  
TTCGCATT-AAT-TTCTACACTACATTATATATTCTGTTTGGGATATGATCAGGCTTGGT  
AGGGACCGCTTTAAGGCTATTAATCCGTGCAGAGTTAGGACAGCCAGGTGCTTTGCTTGG  
AGATGATCAGCTATATAATGTAATCGTGACGGCGCATGCTTTTGTATAATCTTCTTCTT  
AGTAATGCCTATGATGATTGGGGGTTTTGGGAATTGATTGGTACCCTTGATATTAGGGGC  
TCCAGATATAGTATTTCTCGCTTAAACAACATGAGTTTTTGGCTTCTTCCCCCTGCACT  
TTTACTTCTTTTGTCTTCGGCTGCGGTAGAAAGAGGGGTAGGAACGGGATGAACTGTATA  
CCCACCTCTGGCAGGGAATCTTGCTCATGCTGGTGGTTCTGTAGATCTTGCAATTTTTTC  
TTTACACCTTGCTGGGGTATCTTCCATTTTAGGGGCTGTAACTTTATTACTACAATTAT  
TAACATACGATGACAGGGAATGAAGTTTGAGCGTCTCTCGCTGTTTGTGGATCGGTGAA  
GATCACGGCGATCTTACTTCTTCTATCCCTACCTGTTTTGGCGGGGGCTATTACTATGCT  
TTTAACTGATCGAAATTTCAATACTGCTTCTTTGATCCAGCAGGGGGTGGTGATCCTAT  
TTGTATCAGCACCTTTT

>circumcised

AACCAAGAAATTTAGTCATTCTTTATGGTAAAAAGACAGTTAGGCAGA-TGAGATTATT  
AGATCTTTAGTAAAGGAGTAAATCTAAATACTAAAAGATACACCAGATATAATTT-ATT  
TATGTTGAATCTGTGACAGCTTTAAGGGAACTGGGATTGGATACCCCATTTTATTTAGT

TATAAATTTAGTT--TAAGCTTACCGGAGTACTACGAATGTTTAAAACCTCAAAGGGCTTG  
GCGGTGTTTTAGACCTCTCAGGGGAACCTGTCTCGTAATCGACAATCCGCGTTAAACCTA  
ACCTTTTATGGTAAAACAGCTTGTATACCGTCGTCAGGTAACCTCTTAAAAATATAGT  
AGTTAGCTTGAGAATT--TA-ATTAATTAACGTCAGATCAAGGTGCAGCTAATGAAAA  
GGTGAGGATGGGTTACAATTATATATTATAAAATACGGTACT-TGAAATGGAGTATCTTA  
AAGGAGGACTTGAAAGTAATTTTAATTATATAAATAGAATGAATAAGGCTCTGAAACGTG  
CAGAATTTTAATGGCCGAACAGACCAACCCTTAAAGACTTCTGCATCTTTAGGATATTCT  
GGTCCAACATCGAGGTCACAAACCTTTTTTCGATACGGGCTCTTAAAAAAGATAATGCT  
GTTATCCCTACGGTAACCTTCTTTGATCAAAATTCT-TGGATCAAC-GCAAGTAAGA  
CTTA-AAAGGAGGCTTTATTTACTCCTCGGTTGCCCCAACCAAAGT--ATTTAATAGTTA  
TGCCTTTTA-CTTAATTA--GCAAAACCTATTAATTTTTCTAAAGCTCGATAGGGTCTTC  
TTGTCTTTTAATAATATCTGGACTTTTTCATCCAAAAATAAAATTCTAAACAATCAAAAA  
GAGACAGCTGTATTCTTGTCAAACCATTCAATCCAGCCTTCAATTATAAGGCAAATGATT  
ATGCTACCTTTGCACGGTCAGAGTACCGCGGCCGT-TAAAACCACTGGGCAGGTCCGAC  
TTCGCATT-AAT-TTTTACACTACATTATATATTCTATTTGGGATATGATCAGGCTTGGT  
AGGGACTGCTTTAAGGTTATTAATTCGTGCAGAGTTAGGACAGCCAGGTGCTTTGCTTGG  
AGACGATCAGCTATATAATGTAATTGTGACGGCGCATGCTTTTGTATAATTTTCTTTT  
AGTAATGCCTATGATGATTGGGGGTTTTGGGAATTGATTGGTACCTTTGATATTAGGGGC  
TCCAGATATAGTATTTCTCGCTTAACAATATGAGTTTTGGCTTCTCCCCCTGCACT  
TCTACTTCTTTTGTCTTCGGCTGCGGTAGAAAGAGGGGTAGGAACGGGATGAACTGTATA  
CCCACCTCTGGCAGGGAATCTTGCTCATGCTGGTGGTTCTGTAGATCTTGCAATTTTTTC  
TTTACACCTTGCTGGGGTATCTTCTATTTTAGGGGCTGTAACTTCATTACTACAATTAT  
TAATATACGATGACAGGGAATGAAGTTTGAGCGTCTTCGTTGTTTGTGATCGGTGAA  
GATCACGGCGATCTTACTTCTTTATCCCTACCTGTTTTGGCGGGGGCTATTACTATGCT  
TTTAACTGATCGAAATTTCAATACTGCTTCTTTGATCCAGCAGGGGGTGGTGATCCTAT  
TTTGTATCAACATCTTTT

>stercusmuscarum

AACCAAGAAATTTAGTCATTCTTTTATGGTAAAAGACAGTTAGGCAAA-TGAGATTATT  
AGACCTTTAGTATAGGAGTAAAATCTAAATACTAGAAGTTATACCAGATATAATTT-GTT  
TGTGTTGAATCTGTGACAGCTTTAAGGGAACTGGGATTGGATACCCATTATTTTATG  
TATAAATTTAGTT--TAAGCTTACCGGAGTACTACGAATGTTTAAAACCTCAAAGGGCTTG  
GCGGTGTTTTAGACCTCTCAGGGGAACCTGTCTCGTAATCGACAATCCACGCTAGACCTA  
ACCTTTTGTGGTAGTACAGCCTGTATACCGTCGTCAGGTAACCTCTTAAAAATATAGT  
AGTTAGCTTGAGAATT--TG-ATTAATTAGAACGTCAGATCAAGGTGCAGCTAATGAAAA  
GGTGAGGATGGGTTACAATTACATATTTGTAAATACGGTACT-TGAAATGAAGTATCTTA  
AAGGAGGACTTGAAAGTAATTTTAATTATATAAATAGAATGAATAAGGCTCTGAAACGTG  
CAGAATTTTAATGGTCGAACAGACCAACCCTTAAAGACTTCTGCATCTTTAGGACATTCT  
GGTCCAACATCGAGGTCACAAACCTTTTTTCGATATGGGCTCTTAAAAAAGATAATGCT  
GTTATCCCTACGGTAACCTTCTTTAATCAAACTCC-TGGATCAAC-GCAAGTAAGA  
CTTA-AAAGGAGGCTTTATTTACTCCTCGGTTGCCCCAACCAAAGT--ATTTAATAGTTA  
TACTTTTTA-CTTAATTA--GTAAAACCTATTAATTTTTCTAAAGCTCGATAGGGTCTTC  
TTGTCTTTTAATAATATCTGGACTTTTTCATCCAAAAATAAAATTCTAAACAATCAAAAA  
GAGACAGTTGTATTCTTGTCAAACCATTCAATCCAGCCTTCAATTATAAGGCAAATGATT  
ATGCTACCTTTGCACGGTCAGAGTACCGCGGCCGT-TAAAATCACTGGGCAGGTCCGAC  
TTCGCATT-AAT-TATTACACTACACTATATATTTTATTTGGGATATGATCAGGCTTGGT  
AGGGACTGCTTTAAGGCTATTAATTCGTGCAGAGTTAGGACAGCCAGGTGCATTGCTAGG  
AGATGATCAACTATATAATGTAATTGTGACGGCGCATGCTTTTGTATAATCTTCTTTT  
GGTAATGCCTATGATGATTGGGGGTTTTGGAACTGGTGGTACCTTTAATATTAGGGGC

TCCAGATATAGTATTTCTCGTTTAAACAATATGAGTTTTGGCTTCTCCCTCCTGCGCT  
CTTACTCCTTTGTCTTCGGCTGCGGTAGAAAGTGGGGTAGGAACTGGATGAACTGTATA  
TCCGCTCTGGCAGGGAATCTTGCTCATGCTGGTGGCTCTGTAGATCTTGCAATTTTTTC  
TTTACACCTTGCTGGAGTATCTTCTATTTTAGGGGCGGTAACTTTATCACTACAATCAT  
TAATATACGATGACAAGGAATGAAGTTGAGCGTCTTCGTTGTTTGGTTCAGTGAA  
GATCACGGCAATCTTGCTCTTTTGTCTCTGCCTGTTTTAGCTGGAGCCATTACTATGCT  
TTTAACTGATCGAAATTTAATACTGCTTTTTTCGATCCAGCAGGAGGTGGTGACCCTAT  
TTTATATCAGCATCTTTT

>floccatus

AACCAAGAAATTTAGTCATTCTTTATGGTAAAAAGACAGTTAGGCAGG-TGAAATTATT  
GGATCTTTAGTAAAGGAGTAAATCTAAATACTAAAAGTTATACCAGAGATAGTTT-ATT  
TATGTTGAATCTGTGACAGCTTTAAGGGAACTGGGATTGGATACCCCATTTTATTTAGT  
TATAAATTCAGTT--TAAGCTTACCGGAGTACTACGAATGTTTAAACTCAAAGGGCTTG  
GCGGTGTTTTAGACCTCTCAGGGGAACCTGTCTCGTAATCGACAATCCACGTTAGACCTA  
ACCTTTTATAGTAATACAGCTTGTATACCGTCGTCGTCAGGTAACCTCTTAAATGTAGC  
AGTTAGCTTGAGAATT--TA-ATTAATTAGAACGTCAGATCAAGGTGCAGCTAATGAAAG  
GGTGAGGATGGGTTACAATTACATATTTGTAAACACGGTACT-TGAAATGAAGTATCTTA  
AAGGAGGACTTGAAAGTAATTCTATTTATATAAATAGAATGAATAAGGCTCTGAAACGTG  
CAGAATTTAATGGTCGAACAGACCAACCCTTAAGACTTCTGCATCTTTAGGACATTCT  
GGTCCAACATCGAGGTCACAAACCTTTTTTTCGATATGGGCTCTTAAAAAGATAATGCT  
GTTATCCCTACGGTAACATAATTTCTTTAATCAAACTCC-TGGATCAAC-ACAAGTAAGA  
CTTA-AAAGGAGGCTTTATTTACTCCTCGGTTGCCCAACCAAAGT--ATTTAATAGCTA  
TGTCTTTA-CTTGATTA--ACTAAGCCTATTAATTTTTCTAAAGCTCGATAGGGTCTTC  
TTGTCTTTAATAATATTTGGACTTTTTCATCCAAAATAAAATTCTAAACAATTTAAGA  
GAGACAGCTGTATTTGTCAAACCATTCATTCCAGCCTTCAATTATAAGGCAAATGATT  
ATGCTACCTTTGCACGGTCAGAGTACCGCGGCCGTT-TAAAATCACTGGGCAGGTCCGAC  
TTCGTATT-AAT-TATTACACTACATTATATATTTTATTTGGAATATGATCAGGCTTGGT  
AGGAACTGCTTTAAGACTATTGATTGTCGTCAGAGTTAGGACAGCCCGGTGCTTTGCTTGG  
AGACGATCAGTTATATAATGTGATTGTGACGGCGCATGCTTTTGTATAATTTTCTTTT  
AGTAATGCCTATAATAATTGGGGGGTTTGGGAATTGGTTAGTGCCTTTAATATTAGGGGC  
TCCAGACATAGTATTTCTCGCTTAAATAATATGAGTTTTTGACTTCTTCCTCCTGCACT  
TTTACTTCTTTGTCTTCGGCTGCAGTAGAAAGGGGGTAGGTACTGGATGGACTGTATA  
TCCACCTCTGGCAGGGAATCTTGCTCATGCTGGCGGCTCTGTAGATCTTGCAATTTTTTC  
TTTACATCTTGCTGGGGTATCTTCTATTTTAGGAGCGGTAACTTTATTACTACAATTAT  
TAATATGCGATGACAAGGGATGAAATTTGAGCGTCTTTCCTGTTTGTATGGTCGGTGAA  
GATCACGGCTATCTTACTTCTTTATCTCTACCTGTTTGGCAGGGGCTATTACTATGCT  
TTTAACTGATCGAAATTTCAATACTGCTTTTTTGGACCCAGCAGGAGGTGGTGATCCTAT  
CTTGATCAACATCTTTT

>koukae

AACCAAGAAATTTAGTCATTTTTTACGGTAAAAAGACAGTTAGGCGAA-TGAAATCATT  
GGACCTTTAGTAGAGGAGTAAATCTAAATACTAAGAGTTATATCAGACATGGTTT-ATT  
TATGCTGAATCTGTGACAGCTTTAAGGGAACTGGGATTGGATACCCCATTTTATTTAGT  
TATAAATTTAGTT--TAGGCTTACCAGAGTACTACGAATGTTTAAACTCAAAGGGCTTG  
GCGGTGTTTTAGACCTCTCAGGGGAACCTGTCTCGTAATCGATAATCCACGTTAAACCTA  
GCCTTTTGTGGTAATACAGCTTGTATACCGTCGTCGTCAGGTAACCTCTTAAATTTAGT  
AGTTAGCTTGAGAATT--TG-ATTAATTAACGTCAGATCAAGGTGCAGCTAATGAGAA  
GGTGAGGATGGGTTACAATTATATTTGTAAATACGGTACT-TGAAATGAAGTATCTTA  
AAGGAGGACTTGAAAGTAATTTGATTATATAAGCAAATGAATGCGGCTCTGAAACGTG

NNNNATTTTAATGGTCGAACAGACCAACCCTTAAAGACTTCTGCATCTTTAGGACATTCT  
GGTCCAACATCGAGGTCACAAACCTTTTTTCAATATGGGCTCTTAAAAAGATAATGCT  
GTTATCCCTACGGTAACTAATTCCTTTAATCAAACTCT-TGGATCAAC-ACAAGTAAGA  
CTTA-AAAGGAGGCTTTATTTACTCCTCGGTTGCCCCAACCAAAGT--ATTTAATAGTTA  
TATCTTTTA-CTTAATTA--ACGAACCCTACTAATTTATCTAAAGCTCGATAGGGTCTTC  
TTGTCTTTTAATAATATCTGGACTTTTTCATCCAAAAATAAAATTCTAAACAATCTAAAA  
GAGACAGCTGCATTCTTGTCAAACCATTCAATCCAGCCTTCAATTATAAGGCAAATGATT  
ATGCTACCTTTGCACGGTCAGAGTACCGCGGCCGTT-TAAAATCACTGGGCAGGTCCGAC  
TTCGTATTNNNN-NNNNNNNNNTACATTATATATTCTATTTGGAATATGATCGGGGCTGGT  
TGGGACTGCTTAAGGCTATTAATTCGTGCAGAGTTAGGGCAGCCTGGTGCTTTGCTTGG  
GGATGACCAGTTATATAATGTAATTGTAACGGCACATGCTTTTGTTATAATTTTCTTTT  
GGTGATGCCTATAATAATTGGGGGTTTTGGAACTGGTTGGTACCGCTGATATTAGGGGC  
TCCAGACATAGTGTTTCCCGTTTAAATAATATGAGTTTTGGCTTCTTCCTCCTGCGCT  
TTTACTTCTTTGTCTTCAGCTGCGGTAGAAAGTGGGGTAGGAACTGGATGAACTGTATA  
TCCACCATTGTCGGGGAATTTAGCCCATGCTGGCGGATCTGTAGATCTTGCGATTTTTTC  
TTTGATCTTGCTGGGGTATCTTCTATTTTAGGGGCAGTAACTTTATTACTACAATTAT  
TAATATACGATGACAAGGAATGAAGTTTGAACGTCTTTCGTTATTTGTATGGTCGGTAAA  
AATTACGGCTATTTTACTTCTTTTATCTTTACCTGTTTTGGCAGGAGCTATTACTATGCT  
TTTGACTGATCGGAATTTTAATACTGCCTTTTTTGATCCAGCAGGAGGCGGAGATCCTAT  
TTTATATCAGCATCTTTTT

>gubernator

AACCAAGAAATTTAGTCATTCTTTTGCGGTAAAAAGACAGTTAGGCAAG-AGGAATCATT  
GGATCTTTAGTAGAGGAGTAAAATCTAAATACTAAAAGCTATACCGAGTGTGGTTT-ATT  
TATGCTGAGTCTGTGACAGCTTCAAGGGAACTGGGATTGGATACCCCATTTATTTTAGT  
TATAAA-TTAGTT--TAGGCTTACCAGAGTACTACGAATGTTTAAAACTCAAAGAGCTTG  
GCGGTGTTTTAGACCTCTCAGGGGAACCTGTCTCGTAATCGACAATCCACGTTAAACCTA  
ACCTTTTATGGTAATACAGCCTGTATACCGTCGTCGTCAGGTAACCTCTTAAACATAGT  
AGTTAGCTCGAGAATT--TA-ATTAATTAGGACGTCAGATCAAGGTGCAGCTAATGAGAA  
GGTGAGGATGGGTACAATTACATATTTGTAAATACGGCACT-TGAAATGAAGTGCTTA  
AAGGAGGACTTGAAAGTAATTTTAATTATATAGATGGAATGAATGCGGCTCTGAAACGTG  
CAGAATTTTAATGGTCGAACAGACCAACCCTTAAAGACTTCTGCATCTTTAGGATATTCT  
GGTCCAACATCGAGGTCACAAACCTTTTTTTCGATATGGGCTCTTAAAAAGATTATGCT  
GTTATCCCTACGGTAACTAATTTCTTTAATCAAACTCC-TGGATCAAC-ACAAGTAAGA  
CTTA-AAAGGAGGCTTTATTTACTCCTCGGTTGCCCCAACCAAAGT--ATTTAATAGTTT  
TGCCTTTTA-CTTAATCA--GCAAAATCTATTAACCTTTTCTAAAGCTCGATAGGGTCTTC  
TTGTCTTTTAATAACATTTGGGCTTTTTACCCAAAAATAAAATTCTAAACAATCTAAAA  
GAGACAGCTGTATTCTTGTCAAACCATTCAATCCAGCCTTCAATTATAAGGCAAATGATT  
ATGCTACCTTTGCACGGTCAGAGTACCGCGGCCGTT-TAAAA-CACTGGGCAGGTCCGAC  
TTCACATT-AAT-CTATACTACATTATATATTTTATTTGGAATATGATCAGGGTTAGT  
AGGGACTGCCTTAAGGTTGTTAATTCGTGCAGAGTTAGGACAGCCAGGTGCTCTGCTTGG  
GGATGATCAGCTATATAATGTAATTGTGACGGCTCATGCTTTTGTTATAATCTTTTTCTT  
AGTGATGCCTATGATGATTGGAGTTTTGGGAATTGACTAGTGCCTTTAATATTAGGGGC  
TCCAGATATAGTGTTTCTCGGTTGAATAATATGAGTTTTTGGCTTCTTCCTCCTGCGCT  
TTTACTTCTTTTATCTTCGGCCGCGGTAGAAAGCGGAGTAGGTACAGGATGAACTGTATA  
TCCACCTTTGGCAGGGAATCTAGCCACGCGGTGGTTCTGTGGATCTTGCTATTTTCTC  
TTTACACCTTGCTGGTGTGTCTTCTATTTTAGGGGCGGTAAATTTTATTACCACAATTAT  
TAATATGCGATGACAAGGAATGAAATTTGAGCGTCTTTCGTTGTTTGTTGATCGGTAAA  
GATTACTGCTATCTTGCTCTTTTATCTTGCCTGTTTTGGCAGGGGCTATTACTATGCT



TTTAACTGATCGAAATTTTAATACTGCTTTTTTTGACCCGGCAGGAGGTGGTGATCCTAT  
TTTGATCAGCATCTGTTT

>striatus

AACCAAGAAATTTAGTCATTCTTTTATGGTAAAAAGACAGTTAGGCAGG-TAAAATCGTT  
GGACCTTTAGTAGAGGAGTAAAATCTAAATACTAAAAGTTATACCGGGGATGATTT-ATT  
TATGCTGAGTCTGTGACAGCTTTAAGGGAAACTGGGATTGGATACCCCATTTTATTTAGT  
TATAAA-TTAGTT--TAAGCTTACCAGAGTACTACGAATGTTTAAAACTCAAAGAGCTTG  
GCGGTGTTTTAGACCTCTCAGGGGAACCTGTCTCATAATCGACAATCCACGTTAAACCTA  
ACCTTTTATAGTAGTTCAGCTTGTATACCGTCGTCGTCAGGTAACCTCTTAAATATAGT  
AGTTAGCTCGAGAATT--GG-ATTAATTAGAACGTCAGATCAAGGTGCAGCTAATGAGAA  
GGTGAGGATGGGTTACAATTACATATTTGTAAATACGGCACT-TGAAATGAAGTGCTTA  
AAGGAGGACTTGAAAGTAATTTTGATTATATAAATGGAATGAATGCGGCTCTGAAACGTG  
CAGAATTTTAAATGGTCGAACAGACCAACCCTTAAAGACTTCTGCATCTTTAGGATATTCT  
GGTCCAACATCGAGGTCACAAACCTTTTTTTCGATATGGGCTCTTGAAAAAGATAATGCT  
GTTATCCCTACGGTAACTAATTTCTTTAATCAAAATTCC-TGGATCAAC-ACAAGTAAGA  
CTTA-AAAGGAGGTTTTATTTGCTCCCGGTTGCCCAACCAAAGT--ATTTAATAGCTT  
TGCTTTTTA-CTTAATTA--ATAAAATCTATTAATTTTTCTGAAGCTCGATAGGGTCTTC  
TTGTCTTTTAATAATATTTGGACTTTTTCATCCAAAGATAAAATTCTAAACAATCTAAAA  
GAGACAGCTGTATTCTTGTCAAACCATTCAATCCAGCCTTCAATTATAAGGCAAATGATT  
ATGCTACCTTTCACGGTCAGAGTACCGCGGCCGTT-TAAAA-CACTGGGCAGGTCCGAC  
TTCGTATT-AAC-TTATACTACTACATTATATATTTTATTTGGAATGTGATCAGGACTAGT  
AGGGACTGCTTTAAGGTTGTTGATTCTGTGCAGAGTTGGGACAGCCAGGTGCTTTGCTTGG  
GGATGATCAGCTATATAATGTAATTGTGACGGCCCATGCTTTTGTATAATTTTTTCTT  
AGTGATGCCTATAATGATTGGGGGTTTTGGAAATTGGTTGGTGCCTCTTATATTAGGGGC  
TCCAGATATAGTATTTCTCGATTAAATAATATGAGTTTTTGGCTTCTTCTCCTGCTCT  
TCTGCTTCTTCTATCTTCGGCTGCGGTGGAGAGAGGGGTAGGTACTGGATGAACTGTGTA  
TCCACCTCTGGCAGGGAATTTAGCACATGCTGGTGGTTCTGTAGATCTTGCTATTTTCTC  
TTTACATCTTGCTGGTGTCTCTTCCATTTTAGGGGCGGTAAATTTTATTACTACAATTAT  
TAATATACGATGACAAGGAATGAAATTTGAGCGTCTTTCATTGTTTGTGATCGGTAAA  
GATTACGGCTATTTTGCTTCTTTGTCTTTGCCTGTTCTGGCGGGGGCTATTACTATACT  
TTTGACTGATCGAAATTTTAATACTGCTTCTTTGATCCAGCAGGAGGTGGTGATCCCAT  
TTTATATCAACACCTGTTT

>andamanesis

AACCAAGAAATTTAGTCATTCTTTTATGGTAAAAAGACAGTTATGCAGA-TATAATCATT  
AGATCTTCAGTAAAGGAGTAAAATCTATATACTGAAAGTTATACTAGTTGTGATAC-ACT  
TATGCTGAATCTGTGATAGCTTTAAGGGAAACTGGGATTGGATACCCCATTTTATTTAGC  
CGTAAATTCAGTT--TGAACCTACCAGAGTACTACGAATATTTAAAACTCAAAGGGCTTG  
GCGGTGTTTTAGACCTCTCAGGGGAACCTGTCTCGTAATCGACAATCCACGTTAAACCTA  
ACCTTTTATGGTAATACAGTTTGTATACCGTCGTCGTCAGGTAACCTCTTAAATATAGT  
AGTTAGCTCGAGAATT--CC-ATTAATTAGAACGTCAGATCAAGGTGCAGCCAATAAAAG  
GGTGAGGATGGGTTACAATTATATTTATAATTACGGCACT-TGAAATCGAGTGC-TTA  
AAGGAGGACTTGAAAGTAATTTTAAATTATATAAATAAAATGAATTAGGCTCTGAAACGTG  
CAGAATTTTAAATGGTCGAACAGACCAACCCTTAAAGACTTCTGCATCTTTAGGACATTCT  
GGTCCAACATCGAGGTCACAAACCTTTTTTTCGATATGGGCTCTTGAAAAAGATAATGCT  
GTTATCCCTACGGTAACTAATTCCTTTAATCAAACTCT-TGGATCAAT-TCAAGTAGGA  
TTTACAAAGGAGGCTCTAACTACTCCTCGTTGCCCAACCAAAGT--GTTTAATAGCTT  
T-TCTTCTA-CTTAATTA--A-AAAGTCTATTAACCTTTTCTGAAGCTCGATAGGGTCTTC  
TTGTCTTTTAATAATATTTGGACTTTTTCATCCAAAATAAAATTCTAAACAATCAAAAA

GAGACAGATGTATTCTTGTCAAACCATTCAATCCAGCCTTCAATTATAAGGCAAATGATT  
ATGCTACCTTTGCACGGTCAGAGTACCGCGGCCGT-TAAAA-CACTGGGCAGGTCCGAC  
TTCGCATTTAAA-TCTGACACGACATTGTATATTTTATTTGGGATGTGATCTGGCTTAGT  
TGGAACGGCTTTAAGATTATTAATTCGTGCAGAAATTAGGGCAGCCTGGTGCTTTGCTTGG  
AGACGATCAATTATACAATGTAATTGTAACAGCACATGCTTTTGTATAATTTTTTCTT  
AGTAATACCCATAATGATTGGGGGTTTTGGGAACTGATTAGTACCGCTAATATTGGGGGC  
TCCAGATATAGTGTTTTCTCGTTTTAAATAATATGAGTTTTGACTTCTTCTCCAGCGCT  
TTTACTTCTTTTATCGTCAGCCGCAGTGGAAAGTGGAGTAGGTACGGGATGAACTGTATA  
TCCGCCTTTAGCAGGGAATTTAGCTCACGCCGGTGGTTCAGTAGATCTGGCAATTTTTTC  
TCTGCATCTTGCTGGTGCCTCTTCTATCTTAGGAGCAGTAAATTTCAATACCACAATTAT  
TAACATACGGTGACAGGGAATAAAATTTGAACGCTTTTCATTGTTTGTGATCAGTAAA  
GATTACAGCTATCTTACTTCTTTTGTCACTACCTGTATTAGCAGGTGCAATTAATACT  
TCTAACTGATCGAAATTTAATACTGCATTTTTTGACCCGGCAGGAGGTGGTGACCCTAT  
TTTGTATCAACATTTATT

>blanfordianus

AACCAAGAAATTTAGTCATTCTTTGTGGTAAAAAGACAGTTATGCAGA-TATAATCATT  
AGATCTTTAGTAAAGGAGTAAATCTATATACTAAAAGCTATATTAGTTGTGATGT-GCT  
TATGCTGAATCTGTGACAGCTTTAAGGGAACTGGGATTGGATACCCCATTTTITAGC  
CGTAAATTTAGTT--TGAACCTACCAGAGTACTACGAATATTTAAACTCAAAGGGCTTG  
GCGGTGTTTTAGACCTCTCAGGGGAACCTGTCTCATAATCGACAATCCGCGTTAGACCTA  
ACCTTTATGGTAATACAGCCTGTATACCGTCGTCAGGTAACCTCTTAAACATAGT  
AGTTAGCTGGAGAATT--TT-ATTAATTAGAACGTCAGATCAAGGTGCAGCTAATAAGAG  
GGTGAGGATGGGTACAATTATATTTATAACTACGGCACT-AGAAATTGAGTGC-TTA  
AAGGAGGACTTGAAAGTAATTTTAATTACATAAAATAAATGAATTAGGCTCTGAAACGTG  
NAGAATTTAATGGTGAACAGACCAACCTCAAAGACTTCTACATCTTTAGGACATTCT  
GGTCCAACATCGAGGTCACAAACCTTTTTTTCGATATGGGCTCTTAAAAAGATAATGCT  
GTTATCCCTACGGTAACCTAATTCCTTTGATCAAACTCT-TGGATCAAC-TCAAGCAGGA  
TTTATAAAGGAGGCTCTAGCTACTCCTCGGTTGCCCCAACCAAAGT--GTTTAATAGCTT  
T-TCTTTTA-CTTAATTA--A-AAAGCCTATTAATTTTTCTGAAGCTCGATAGGGTCTTC  
TTGTCTTTTAATAATATTTGGATTTTTTCATCCAAAATAAAATTCTAAACAATCAAAAA  
GAGACAGGTGTATTCTTGTCAAACCATTCAATCCAGCCTTCAATTATAAGGCAAATGATT  
ATGCTACCTTTGCACGGTCAGAGTACCGCGGCCGT-TAAAT-CACTGGGCAGGTCCGAC  
TTCGATTTTAGG-TCTGACACGACATTGTATATTTTATTTGGGATGTGATCCGGCTTAGT  
TGGAACGGCTTTAAGATTGCTAATTCGTGCAGAAATTAGGGCAGCCTGGTGCTTTGCTTGG  
AGACGATCAACTATACAATGTAATTGTAACAGCACATGCTTTTGTATAATTTTTTCTT  
AGTAATGCCCATGATAATCGGGGGATTTGGAACTGATTAGTACCGTTAATGTTGGGGGC  
TCCTGATATAGTGTTTCCTCGTTTAAATAATATGAGTTTCTGACTTCTTCTCCGGCGTT  
ATTACTTCTTTTGTGTCAGCCGCAGTGGAAAGTGGAGTAGGTACGGGATGAACTGTATA  
TCCGCCTTTAGCAGGGAATTTAGCTCACGCCGGGGTTCAGTGGATCTGGCAATTTTTTC  
TTTACATCTTGCCGGTGCGTCTTCTATTTTGGGGGCAGTAACTTTATTACCACAATTAT  
TAATATACGGTGACAGGGAATAAAATTTGAACGCTTTTCATTGTTGTTGATCGGTAAA  
AATTACAGCTATCTTACTTCTTTTGTCACTGCCTGTATTAGCGGGTGCAATTAATACT  
TCTAACTGATCGAAATTTAATACTGCATTTTTTGATCCGGCAGGAGGTGGTGATCCTAT  
TTTGTACCAACATTTATT

>australis

AACCAAGAAATTTAGTCATTCTTCTACGGTAAAAAGACAGTTATACAAA-TATAATCATT  
AGATCTTCAGTAGAGGAGTAAATCTATATACTGAAAGTTATACTAAACATGATTT-ACT  
TATGTTGAATCTGTGACAGCTTTAAGGGAACTGGGATTGGATACCCCATTTTITAGT

CGTAAATTTAGTT--TAAGCTTACCAGAGTACTACGAATGTTTAAAACCTCAAAGGGCTTG  
GCGGTGTTTTAGACCTCTCAGGGGAACCTGTCTCGTAATCGACAATCCACGTTAGACCTA  
ACCTTTTGTAGTAATACAGCCTGTATACCGTCGTCAGGTAACCTCTTAAAAATATAGT  
AGTTAGCTCGAGAATT--TT-ATTAATTAACGTCAGATCAAGGTGCAGCTAATAAAAA  
GGTGAGGATGGGTTACAATTATATATTTGTAAATACGGCACT-TGAAATGAAGTGCTTA  
AAGGAGGACTTGAAAGTAATTTTAATTATATAAGTGAAATGAATAAGGCTCTGAAACGTG  
CAGAATTTTAATGGTGAACAGACCAACCCTTAAAGACTTCTGCATCTTTAGGACATTCT  
GGTCCAACATCGAGGTCACAAACCTTTTTTCGATATGAGCTCTTGAAAAAGATAATGCT  
GTTATCCCTACGGTAACCTAATTCTTTGATCAAAATTCT-TGGATCAAC-ACAGGTAAGA  
TTTA-AAAGGAGGCTCTAATTACTCCTCGGTTGCCCCAACCAAAGT--ATTTAATAGCTT  
T-TCTTCTA-CTTAATTG--ATAAAGCCTACTAATTTTTCTGAAGCTCGATAGGGTCTTC  
TTGTCTTTTAATAACATTTGGACTTTTTTCATCCAAAAATAAAATTCTAAACAATCAAAAA  
GAGACAGCTGTATTCTTGTCAAACCATTCAATCCAGCCTTCAATTATAAGGCAAATGATT  
ATGCTACCTTTGCACGGTCAGAGTACCGCGGCCGT-TAAAA-CACTGGGCAGGTCCGAC  
TTCGTATTTGTT-TCTGACACGACATTATATATTTTATTTGGGATGTGGTCCGGCTTAGT  
TGGAACGGCTTTAAGACTGTTAATTCGTGCAGAATTAGGGCAGCCGGGTGCTTTACTTGG  
AGATGATCAACTATATAATGTGATTGTAACGGCCCATGCTTTTGTATAATTTTTTCTT  
AGTAATGCCTATGATGATTGGAGGTTTTGGAAATTGATTGGTACCTTTAATATTAGGGGC  
TCCAGATATAGTATTTCTCGCTTAACAATATAAGTTTTTGGCTTCTTCTCCGGCACT  
TTTACTTCTTTGTCGTGAGTGCAGTAGAAAGTGGGGTAGGTACAGGATGAACTGTATA  
TCCACCTTTGGCTGGAAATTTAGCTCATGCTGGTGGTTCTGTAGATCTGGCGATTTTTTC  
TTTACATCTTGCTGGTGTATCTTCTATTTTAGGAGCAGTGAATTCATTACTACAATTAT  
TAATATACGGTGACAAGGGATAAAATTTGAGCGTCTTCTTGTGTTGTTGGTCGGTGAA  
AATTACGGCCATTTTACTTCTTTGCTTTACCTGTATTAGCGGGTGCAATTACTATGCT  
TTTAACTGATCGGAATTTAATACTGCATTTTTTGATCCGGCAGGAGGTGGTGATCCTAT  
CTTATATCAACATTTGTTT

>laterculatus

AACCAAGAAATTTAGTCATTCTTTACGGTAAAAAGACAGTTATACAAG-TATAATCATT  
AGATCTTCAGTAGAGGAGTAAATCTATATACTGAAAGTTATACTAGATGTGATTT-ACT  
AGTGTTGAATCTGTGACAGCTTTAAGGGAACTGGGATTGGATACCCCATTTATTTTAGT  
CGTAAATTTAGTT--TAAACTTACCGGAGTACTACGAATTTTTAAAACCTCAAAGGGCTTG  
GCGGTGTTTTAGACCTCTCAGGGGAACCTGTCTCGTAATCGACAATCCACGTTAGACCTA  
ACCTTTTATGGTAATACAGCCTGTATACCGTCGTCAGGTAACCTCTTAAAAATATAGT  
AGTTAGCTCGAGAATT--TT-ATTAATTAACGTCAGATCAAGGTGCAGCTAATGAAAG  
GGTGAGGATGGGTTACAATTATATATTTGTAAATACGGCACT-TGAAATGAAGTGCTTA  
AAGGAGGACTTGAAAGTAATTTTAATTATATAAGTAAATGAATAAGGCTCTGAAACGTG  
CAGAATTTTAATGGTGAACAGACCAACCCTTAAAGACTTCTGCATCTTTAGGACATTCT  
GGTCCAACATCGAGGTCACAAACCTTTTTTCGATATGGGCTCTTGAAAAAGATAATGCT  
GTTATCCCTACGGTAACCTAATTCTTTGATCAAAATTCT-TGGATCCAC-ACAAGTAAGA  
CTTA-AAAGGAGGCTCTAATTACTCCTCGGTTGCCCCAACCAAAGT--ATTTAATAGTTT  
T-TCTTTTA-CTTAATTGATATAAAGCCTACTAATTTTTCTGAAGCTCGATAGGGTCTTC  
TTGTCTTTTAATAATATCTGGACTTTTTTCATCCAAAAATAAAATTCTAAATAATCAAAAA  
GAGACAGGTGTATTCTTGTCAAACCATTCAATCCAGCCTTCAATTATAAGGCAAATGATT  
ATGCTACCTTTGCACGGTCAGAGTACCGCGGCCGT-TAAAA-CACTGGGCAGGTCCGAC  
TTCGTATTT-AT-TCTGACACGACATTATATATTTTGTGTTGGGATGTGGTCTGGTTTAGT  
TGGAACGGCTTTAAGATTATTGATTTCGTGCAGAGTTAGGGCAGCCGGGTGCTTTACTTGG  
AGATGATCAGCTATATAATGTAATTGTAACAGCTCATGCTTTTGTATAATTTTTTCTT  
AGTGATACCCATGATAATTGGGGGTTTTGGAAATTGATTGGTACCTTTGATATTAGGGGC

TCCAGACATAGTATTTCTCGTTTGAATAATATAAGTTTTGACTTCTTCTCCGGCACT  
TTTACTTCTTTTATCGTCAGCTGCAGTGGAAGAGGGGTAGGTACAGGATGAACTGTATA  
TCCACCTTTAGCCGGAAATTTGGCTCACGCCGGTGGCTCTGTAGATCTGGCGATTTTTTC  
TTTACATCTTGCTGGTGTGTCTTCTATTTTAGGAGCAGTGAATTCATTACTACGATTAT  
TAATATGCGGTGACAGGGGATAAAATTTGAACGTCTTCTCTGTTTGTGATCGGTAAA  
AATTACAGCTATCTTACTTCTTTGTCTTTACCTGTATTAGCGGGTGCAATTAATGCT  
TTTAACTGATCGAAATTTAATACTGCATTTTTGACCCGGCAGGGGTGGTGATCCTAT  
TTTATATCAACATTTGTTT

>neptunus

AACCAAGAAATTTAGTCATTCTTTACGGTAAAAAGACAGTTATACAAG-TATAATCATT  
AGATCTTCAGTAGAGGAGTAAATCTATATACTGAAAGTTATACTAGGTATGGTTT-ATT  
TATGTTGAATCTGTGACAGCTTTAAGGGAACTGGGATTGGATACCCCATTTTTTAGT  
CGTAAATTTAGTT--TAAACTTACCGGAGTACTACGAATATTTAAACTCAAAGGGCTTG  
GCGGTGTTTTAGACCTCTCAGGGGAACCTGTCTCGTAATCGACAATCCACGTTAGACCTA  
ACCCTTTATGGTAATACAGCCTGTATACCGTCGTCAGGTAACCTTCTTAAATGTAGT  
AGTTAGCTCGAGAATT--TT-ATTAATTAACGTCAGATCAAGGTGCAGCTAATGAAAG  
GGTGAGGATGGGTACAATTATATTTGTAAGTACAGCACT-TGAAATGAAGTGTCTTA  
AAGGAGGACTTGAAAGTAATTTTAATTATATAAGTAAATGAATAAGGCTCTGAAACGTG  
CAGAATTTAATGGTGAACAGACCAACCCTTAAGACTTCTGCATCTTTAGGACATTCT  
GGTCCAACATCGAGGTCACAAACCTTTTTTCGATATGGGCTCTGAAAAAGATAATGCT  
GTTATCCCTACGGTAACATAATCCTTTGATCAAAATTTT-TGGATCAAC-ACAAGTAAGA  
CTTA-AAAGGAGGCTCTAATTACTCCTCGGTTGCCCAACCAAAGT--ATTTAGTAGCTT  
T-TCTTTTA-TTTGATTG--ATAAAGCCTACTAATTTTTCTAAAGCTCGATAGGGTCTTC  
TTGTCTTTAATAATATCTGGACTTTTTCATCCAAAAATAAAATTCTAAATAATCAAAAA  
GAGACAGGTGATTTCTTGTCAAACCATTCATTCCAGCCTTCAATTATAAGGCAAATGATT  
ATGCTACCTTTGCACGGTCAGAGTACCGCGGCCGTT-TAAAA-CACTGGGCAGGTCCGAC  
TTCGTATTTAAA-TTTGACACGACATTATACATTTTATTTGGGATGTGGTCCGTTTAGT  
TGGAACGGCTTAAGATTGTTGATTGTCGAGCAATTAGGACAGCCGGGTGCTTTACTTGG  
GGATGATCAGCTATATAATGTGATTGTAACAGCCCATGCTTTTGTATAATTTTTTCTT  
AGTGATGCCTATGATGATTGGAGGTTTTGGAAATTGATTAGTACCTTTGATATTAGGGGC  
TCCAGATATAGTGTTTCTCGCTTAAATAATATAAGTTTTGACTTCTTCTCCGGCGCT  
TTTACTTCTTTGTGTCAGCTGCAGTAGAGAGAGGGGTAGGTACAGGTGAACTGTGTA  
TCCACCTTTGGCCGGAAATTTAGCTCATGCCGGTGGTCTGTAGATCTGGCAATTTTTTC  
TCTACATCTTGCTGGTGTGTCTTCTATTTTAGGAGCAGTGAATTCATTACTACAATTAT  
TAATATGCGGTGGCAGGGGATAAAATTTGAGCGTCTTTCCTTGTTTGTGTCAGTGAA  
AATTACGGCTATTTTACTTCTTTATCTTTGCCTGTATTAGCGGGTGCAATTAATGCT  
TTTAAACAGATCGGAATTTAATACTGCATTCTTGATCCAGCAGGGGTGGTGATCCTAT  
TTTATATCAGCATTTATTC

>moluccensis

AACCAAGAAATTCAGTCATTCTTTCACGGTAAAAAGACAGTTATACAAG-CATGATCATT  
AGACCTTTAGTAGAGGAGTAAATCTATATACTAAAAGTTATACTGGATATGATTT-ATT  
GATGTTGAATCTGTGACAGCTTTAAGGGAACTGGGATTGGATACCCCATTTTTTAGT  
CGTAAATTTAGTT--TAAACTTACAGAGTACTACGAATATTTAAACTCAAAGGGCTTG  
GCGGTGTTTTAGACCTCTCAGGGGAACCTGTCTCGTAATCGACAATCCACGTTAGACCTA  
ACCCTTTATGGTAATTCAGCCTGTATACCGTCGTCAGGTAACCTTCTTAAATATAGT  
AGTTAGCTCGAGAACA--TT-ATTAATTAACGTCAGATCAAGGTGCAGCTAATAAGAG  
GGTGAGGATGGGTACAATTACAGATTTGTAATACGGCATT-TGAAATGGAGTGTTTA  
AAGGAGGACTTGAAAGTAATTTGATTATATAAATAAGATGAATAAGGCTCTGAAACGTG

CAGAATTTTAATGGTGAACAGACCAACCCTTAAAGACTTCTGCATCTTTAGGACATTCT  
GGTCCAACATCGAGGTCACAAACCTTTTTTCGATATGGGCTCTTGAAAAAGATAATGCT  
GTTATCCCTACGGTAACATAATTCTTTGATCAAAATTCC-TGGATCTGC-ACAAGTAGGA  
CTTA-AAAGGAGGCTCTAATTACTCCTCGGTTGCCCCAACCAAAGT--ATTTAATAGCTT  
T-TCTTTTA-CTTAATAG--ATGAAGCCTACTAATTTTTCTGAAGCTCGATAGGGTCTTC  
TTGTCTTTTAATAATATCTGGACTTTTTCATCCAAAAATAAAATTCTAAATAATCAAAAA  
GAGACAGGTATATTCTTGTCAAACCATTCAATCCAGCCTTCAATTATAAGGCAAATGATT  
ATGCTACCTTTGCACGGTCAGAGTACCGCGGCCGTT-TAAAA-CACTGGGCAGGTCCGAC  
TTCGTATTTAAT-TTTGACACGACATTATATATTTTATTCGGGATATGGTCCGGTTTAGT  
TGGAACGGCTTTAAGGTTGTTAATTCGTGCAGAATTAGGGCAGCCGGGTGCTTTACTTGG  
AGATGATCAGCTATATAATGTGATTGTAACGGCCCATGCTTTTGTATAATTTTTTCTT  
AGTGATGCCTATAATGATTGGAGTTTTGGGAATTGATTAGTGCCTTTGATATTAGGGGC  
TCCAGATATAGTATTTCTCGTTTGAATAATATAAGTTTTTGGCTTCTTCTCCGGCACT  
TTTACTTCTTCTATCGTCAGCTGCAGTAGAAAGGGGGGTAGGTACGGGATGAACTGTATA  
CCCGCTTTGGCTGGAAATTTGGCTCACGCCGGTGGTTCTGTGGATCTAGCGATTTTTTC  
TTTACACCTTGCTGGTGTATCTTCTATTTTAGGGGCAGTGAACCTTTATTACTACAATTAT  
TAACATGCGATGACAGGGAATAAAGTTTGAGCGTCTTTCTTTGTTTGGTTCGGTGAA  
GATTACGGCTATTTTACTTCTTTGTCTTTACCTGTATTGGCGGGTGCAATTACTATGCT  
TTTAACTGATCGAAATTTTAATACTGCGTTTTTTGATCCAGCAGGAGGTGGTGATCCTAT  
TTTGATCAACACTTGTTT

>cebuensis

NNNNNNNNNNNNNNNNNNNNNNNNNNNNNNCGGT-AAAAGACAGTTATACAAG-CATGATCATT  
AGACCTTTAGTAGAGGAGTAAAATCTATATACTGAAAGTTATACTGGATATGATTT-ATT  
GATGTTGAATCTGTGACAGCTTTAAGGGAACTGGGATTGGATACCCATTATTTTTAGT  
CGTAAATTTAGTT--TAAACTTACCAGAGTACTACGAATATTTAAACTCAAAGGGCTTG  
GCGGTGTTTTAGACCTCTCAGGGGAACCTGTCTCGTAATCGACAATCCGCGTTAAACCTA  
ACCCTTTATGGTAATTCAGCCTGTATACCGTCGTCAGGTAACCTCTTAAATATAGT  
AGTTAGCTCGAGAACA--TT-ATTAATTAACCGTCAGATCAAGGTGCAGCTAATAAGAG  
GGTGAGGATGGGTACAATTACAGATTTGTAAATACGGCATT-TGAAACGAAGTGTCTTA  
AAGGAGGACTTGAAAGTAATTTTAATTATATAAATAAGATGAATAAGGCTCTGAAACGTG  
NNNNATTTTAATGGTGAACAGACCAACCCTTAAAGACTTCTGCATCTTTAGGACATTCT  
GGTCCAACATCGAGGTCACAAACCTTTTTTCGATATGGGCTCTTGAAAAAGATAATGCT  
GTTATCCCTACGGTAACATAATTCTTTGATCAAAATTCT-TGGATCTAC-ACAAGTAAGA  
CTTA-AAAGGAGGCTCTAATTACTCCTCGGTTGCCCCAACCAAAGT--ATTTAATAGCTT  
T-TCTTTTA-CTTAATAG--ATCAAGCCTACTAATTTTTCTGAAGCTCGATAGGGTCTTC  
TTGTCTTTTAATAATATCTGGACTTTTTCATCCAAAAATAAAATTCTAAATAATCAAAAA  
GAGACAGATGTATTCTTGTCAAACCATTCAATCCAGCCTTCAATTATAAGGCAAATGATT  
ATGCTACCTTTGCACGGTCAGAGTACCGCGGCCGTT-TAAAA-CACTGGGCAGGTCCGAC  
TTCGTATNNNNN-NNNNNNNNNNNCATTATATATTTTATTTGGGATATGGTCTGGTTTAGT  
TGGAACGGCTTTAAGGTTGTTAATTCGTGCAGAATTAGGGCAGCCGGGTGCTTTACTTGG  
AGATGATCAGCTATATAATGTGATTGTAACGGCCCATGCTTTTGTATAATTTTTTCTT  
AGTGATGCCTATAATGATTGGAGTTTTGGGAATTGATTAGTGCCTTTGATATTAGGGGC  
TCCAGATATAGTATTTCTCGTTTAAATAATATAAGTTTTTGGCTTCTTCTCCGGCACT  
TTTACTTCTTCTGTCTGCTCAGCTGCAGTAGAAAGGGGGGTAGGTACGGGATGAACTGTATA  
CCCGCTTTGGCTGGAAATTTGGCTCACGCCGGTGGTTCTGTGGATCTAGCGATTTTTTC  
TTTACACCTTGCTGGTGTATCTTCTATTTTAGGAGCAGTGAACCTTTATTACTACGATTAT  
TAACATACGATGACAGGGGATAAAGTTTGAGCGTCTTTCTTTGTTTGGTTCGGTGAA  
GATTACGGCTATTTTACTTCTTTGTCTTTACCTGTATTGGCAGGTGCAATTACTATGCT

TTTAACTGATCGAAATTTTAATACTGCGTTTTTTGACCCAGCAGGAGGTGGTGATCCTAT  
TTTGATCAACACTTGTTT

>goudeyi

AACCAAGAAATTCAGTCATTCTTTACGGTAAAAAGACAGTTATACAAG-CATGATCATT  
AGACCTTTAGTAGAGGAGTAAAATCTATATACTAAAAGTTATACTGGATATGATTT-ATT  
GATGTTGAATCTGTGACAGCTTTAAGGGAACTGGGATTGGATACCCCATTTTATAGT  
CGTAAATTTAGTT--TAAACTTACCAGAGTACTACGAATATTTAAAACCTCAAAGGGCTTG  
GCGGTGTTTTAGACCTCTCAGGGGAACCTGTCTCGTAATCGACAATCCACGTTAGACCTA  
ACCCTTTGTGGAATTCAGCCTGTATACCGTCGTCGTCAGGTAACCTCTTAAAAATATAGT  
AGTTAGCTCGAGAACA--TT-ATTAATTGAAACGTCAGATCAAGGTGCAGCTAATAAAG  
GGTGAGGATGGGTACAATTACAGATTTGTAAATACGGCATT-TGAAATGAAGTGCTTA  
AAGGAGGACTTGAAAGTAATTTTAATTATATAAATAAAATGAATAAGGCTCTGAAACGTG  
CAGAATTTTAATGGTCGAACAGACCAACCCTTAAAGACTTCTGCATCTTTAGGACATTCT  
GGTCCAACATCGAGGTCACAAACCTTTTTTTCGATATGGGCTCTTGAAAAAGATAATGCT  
GTTATCCCTACGGTAACTAATTCTTTGATCAAAATTCC-TGGATCTAC-ACAAGTAAGA  
CTTA-AAAGGAGGCTCTAATTACTCCTCGGTTGCCCCAACCAAAGT--ATTTAATAGCTT  
T-TCTTTTA-CTTAATAG--ATAAACCTACTAATTTTTCTGAAGCTCGATAGGGTCTTC  
TTGTCTTTTAATAATATCTGGACTTTTTCATCCAAAAATAAAATTCTAAATAATCAAAAA  
GAGACAGGTGTATTCTTGTCAAACCATTCAATCCAGCCTTCAATTATAAGGCAAATGATT  
ATGCTACCTTTCACGGTCAGAGTACCGCGGCCGTT-TAAAA-CACTGGGCAGGTCCGAC  
TTCGTATTTAAT-TTTGACACGACATTATATATTTTTATTGGGATGTGGTCTGGTTTAGT  
TGGAACGGCTTTAAGGTTGTTAATTCGTGCAGAATTAGGGCAGCCGGGTGCTTTACTTGG  
AGATGATCAGCTGTATAATGTGATTGTAACGGCCCATGCTTTTGTATAATTTTTTCTT  
AGTGATGCCTATAATGATTGGAGGTTTTGGGAATTGATTAGTGCCTTTGATATTAGGGGC  
TCCAGATATAGTGTTTCCTCGTTTGAATAATATAAGTTTTTGGCTTCTTCTCCGGCACT  
TTTACTTCTTCTGTCGTCAGCTGCAGTAGAGAGGGGGGTAGGTACAGGATGAACTGTATA  
CCCGCTTTGGCTGGAAATTTGGCTCACGCCGGTGGTTCTGTGGATCTAGCGATTTTTTC  
TTTACATCTTGCTGGTGTATCTTCTATTTTAGGAGCAGTGAACCTTTATTACTACAATTAT  
TAATATACGATGACAGGGAATAAAGTTTGAGCGTCTTCTTTGTTTGGTTCGGTGAA  
GATTACGGCTATTTTACTTCTTTTGTCTTACCTGTATTGGCGGGTGCAATTACTATGCT  
TTTAACTGATCGAAATTTTAATACTGCATTTTTTACCCAGCAGGAGGTGGTGATCCTAT  
TTTATATCAACACTTGTTT

>madecassinus

AACCAAGAAATTTAGTCATTCTTTATGGTAAAAAGACAGTTATACAAG-TATAATCATT  
AGATCTTTAGTAGAGGAGTAAAATCTATATACTGATAGTTATACTAAATATGATTT-GCT  
TATGTTGAATCTGTGACAGCTTTAAGGGAACTGGGATTGGATACCCCATTTTATAGT  
CGTAAATTTAGTT--TAAACTTACCAGAGTACTACGAATGTTTAAAACCTCGAAGGGCTTG  
GCGGTGTTTTAGACCTCTCAGGGGAACCTGTCTCGTAATCGACAATCCACGTTAGACCTA  
ACCCTTTATAGTAATACAGCCTGTATACCGTCGTCGTCAGGTAACCTCTTAAAAATATAGT  
AGTTAGCCCGAAAATT--TT-ATTAATTAACGTCAGATCAAGGTGCAGCTAATAAGAG  
GGTGAGGATGGGTACAATTATACATTATAATTACGGCATT-TGAAATGAAGTGT-ATA  
AAGGAGGACTTGAAAGTAATTTTAATTATATAAATAAAATGAATAAGGCTCTGAAACGTG  
CAGAATTTTAATGGTCGAACAGACCAACCCTTAAAGACTTCTGCATCTTTAGGACATTCT  
GGTCCAACATCGAGGTCACAAACCTTTTTTTCGATATGGGCTCTTGAAAAAGATAATGCT  
GTTATCCCTACGGTAACTAATTCTTTGATCAAACTCT-TGGATCAAC-ATAAGTAAGA  
TTTA-AAAGGAGGCTCTAATTACTCCTCGGTTGCCCCAACCAAAGT--ATTTAATAGCTT  
C-TCTTTTA-TATAATTG--ATAAAGCCTACTAATTTTTCTAAAGCTCGATAGGGTCTTC  
TTGTCTTTTAATAATATTTGAACTTTTTCATCCAAAAATAAAATTCTAAACAATCAAAAA

GAGACAGGTGTATTCTTGTCAAACCATTCATTCCAGCCTTCAATTATAAGGCAAATGATT  
ATGCTACCTTTGCACGGTCAGAGTACCGCGGCCGTT-TAAAA-CACTGGGCAGGTCCGAC  
TTCGTATTTAAT-TTCGACACGACATTGTACATTTTATTTGGGATGTGATCTGGTTTAGT  
TGGAACGGCTTTAAGGTTGTTAATTCGTGCAGAAATTAGGACAGCCGGTGCTTTACTTGG  
AGATGATCAGTTATATAATGTAATTGTAACAGCCCATGCTTTTGTATAATTTTTTCTT  
AGTAATACCTATGATGATTGGGGGTTTTGGAAATTGATTAGTACCTTTAATATTAGGAGC  
TCCAGATATAGTGTTTCCTCGTTTTAAATAATATAAGTTTTTGGCTTCTTCTCCGGCACT  
TTTACTTCTTTTATCATCAGCTGCAGTGGAGAGTGGGGTAGGTACAGGATGAACTGTATA  
TCCGCTTTAGCTGGAAATTTAGCTCATGCTGGTGGTCTGTAGATTTGGCGATTTTTTC  
TTTACATCTTGCTGGAGCGTCTTCTATTTTAGGAGCGGTAACTTCATTACCACAATTAT  
TAATATGCGGTGACAAGGAATAAAATTTGAGCGTCTTCTTTATTTGTTTGGTCAGTAAA  
GATTACGGCTATTTTACTTCTTTTATCTTTACCTGTGTTAGCAGGTGCAATTACTATGCT  
TCTGACTGATCGGAATTTAATACTGCATTTTTTGATCCGGCAGGAGGTGGCGATCCTAT  
TTTATATCAGCATTATTT

>mucronatus

AACCAAGAAATTTAGTCATTCTTTACGGTAAAAAGACAGTTATACAAA-GATAATCATT  
AGATCTTCAGTAGAGGAGTAAATCTACATACTGAAAGATATACTAGATGTGGTTT-ACT  
TATGTTGAATCTGTGACAGCTTTAAGGGAACTGGGATTGGATACCCCATATTTTTAGT  
CGTAAATTTAGTT--TAAGCTTACCTGAGTACTACGAATGTTTAAACTCAAAGGGCTTG  
GCGGTGTTTTAGACCCCTCAGGGGAACCTGTCTCGTAATCGACAATCCACGTTAGACCTA  
ACCTTTTATGGTAATACAGCTTGTATACCGTCGTCAGGTAACTTTTTAAATATAGT  
AGTTAGCCTGAGAATT--TT-ATTAATTAACGTCAGATCAAGGTGCAGCTAATAAAAG  
GGTGAGGATGGGTACAATTATATTTGTAAATATGGCATT-TGAAATGAAGTGTTTA  
AAGGAGGACTTGAAAGTAATTTAATTATATAAAATAAAATGAATAAGGCTCTGAAACGTG  
CAGAATTTAATGGTGAACAGACCAACCTTTAAAGACTTCTGCATCTTTAGGACATTCT  
GGTCCAACATCGAGGTCACAAACCTTTTTTCGATATGGGCTCTTGAAAAAGATAATGCT  
GTTATCCCTACGGTAACTAATTCCTTTGATCAAACTCT-TGGATCTAT-ACATGTAAGA  
CTTA-AAAGGAGGCTCTAATTACTCCTCGGTTGCCCCAACCAAAGT--GTTAATAGCTT  
T-TCTTTTA-TTTAATTG--A-AAAGCCTATTAATTTTTCTAAAGCTCGATAGGGTCTTC  
TTGTCTTTAATAGCATTGGACTTTTTCATCAAAAAATAAAATTCTAAACAATCAAAAA  
GAGACAGGTGTATTCTTGTCAAACCATTCATTCCAGCCTTCAATTATAAGGCAAATGATT  
ATGCTACCTTTGCACGGTCAGAGTACCGCGGCCGTT-TAAAA-CACTGGGCAGGTCCGAC  
TTCATATTTAATCCTTAACATGACATTGTATTTTTGTTTGAATATGATCCGGTTTAGT  
TGGAACGGCTTTAAGATTGTTAATTCGTGCAGAAATTAGGGCAGCCAGGTGCTTTACTTGG  
GGATGACCAGCTGTATAATGTGATTGTAACAGCCCATGCTTTTGTATAATTTTTTCTT  
AGTAATGCCCATGATGATTGGAGGTTTTGGAACTGGTTGGTACCTTTGATATTAGGGGC  
TCCAGATATAGTATCCCCGTTTAAACAATATAAGTTTTTGACTTCTTCTCCGGCACT  
TTTACTTCTTATCGTCAGCTGCAGTAGAGAGTGGGGTAGGTACAGGATGAACTGTATA  
TCCACCTTTAGCTGGGAATTTGGCTCATGCTGGTGGTCCGTAGATCTGGCAATTTTCTC  
TTTACATCTTGCTGGTGTGTCTTCTATTTTAGGGGCAGTAACTTTATTACTACGATTAT  
TAATATACGGTGACAGGGAATAAAATTTGAGCGTCTTCTTGTGTTTGGTCAGTAAA  
AATTACGGCTATCTTACTTCTTATCTTGCCTGTATTGGCAGGTGCAATCACTATGCT  
TTTAACTGATCGGAATTTCAATACTGCATTTTTTGATCCAGCAGGAGGTGGAGATCCTAT  
TTTATATCAACATTTGTTT

>sutanorcum

AACCAAGAAATTTAGTCATTCTTTACGGTAAAAAGACAGTTATACAAA-GATAATCATT  
AGATCTTCAGTAGAGGAGTAAATCTACATACTGAAAGATATACTAGATGTGGTTT-ACT  
TATGTTGAATCTGTGACAGCTTTAAGGGAACTGGGATTGGATACCCCATATTTTTAGT

CGTAAATTTAGTT--TAAGCTTACCTGAGTACTACGAATGTTTAAAACTCAAAGGGCTTG  
GCGGTGTTTTAGACCCCTCAGGGGAACCTGTCTCGTAATCGACAATCCACGTTAGACCTA  
ACCCTTTATGGTAATACAGCTTGTATACCGTCGTCAGGTAACTTTTTAAATATAGT  
AGTTAGCCTGAGAATT--TT-ATTAATTAACGTCAGATCAAGGTGCAGCTAATAAAAG  
GGTGAGGATGGGTTACAATTATATATTTGTAAATATGGCATT-TGAAATGAAGTGTTTA  
AAGGAGGACTTGAAAGTAATTTTAATTATATAAAATAAAATGAATAAGGCTCTGAAACGTG  
CAGAATTTTAATGGTGAACAGACCAACCCCTAAAGACTTCTGCATCTTTAGGACATTCT  
GGTCCAACATCGAGGTCACAAACCTTTTTTCGATATGGGCTCTTGAAAAAGATAATGCT  
GTTATCCCTACGGTAACCTAATTCTTTGATCAAACTCT-TGGATCTAT-ACATGTAAGA  
CTTA-AAAGGAGGCTCTAATTACTCCTCGGTTGCCCCAACCAAAGT--GTTAATAGCTT  
T-TCTTTTA-TTTAATTG--A-AAAGCCTATTAATTTTTCTAAAGCTCGATAGGGTCTTC  
TTGTCTTTTAATAGCATTGGACTTTTTCATCCAAAAATAAAATTCTAAACAATCAAAAA  
GAGACAGGTGTATTCTTGTCAAACCATTCATTCCAGCCTTCAATTATAAGGCAAATGATT  
ATGCTACCTTTGCACGGTCAGAGTACCGCGGCCGTT-TAAAA-CACTGGGCAGGTCCGAC  
TTCATATTTAACTCCTAACATGACATTGTATTTTTGTTTGAATATGATCCGGTTTAGT  
TGGAACGGCTTTAAGGTTGTTAATTCGTGCAGAATTAGGGCAGCCAGGTGCTTACTTGG  
GGATGATCAGCTATATAATGTGATTGTAACAGCCCATGCTTTTGTATAATTTTTTCTT  
AGTAATGCCTATGATGATTGGGGGTTTTGGGAACTGGTTAGTGCCTTTGATATTAGGGGC  
TCCAGATATGGTATCCCTCGTTTAAACAATATAAGTTTTTGAATCTTCTCCTCCGGCACT  
TTTACTTCTCTGTGCTCAGCTGCAGTAGAAAGTGGGGTAGGTACAGGATGAACTGTATA  
TCCACCTTTAGCTGGGAATTTGGCTCATGCCGGTGGTTCTGTAGATCTGGCAATTTTTTC  
TTTACATCTTGCTGGTGTGTCTTCTATTTTAGGAGCGGTGAACCTTATTACTACGATTAT  
TAATATGCGGTGACAGGGAATAAAATTTGAGCGTCTTCTTTGTTTGTCTGGTCAGTAAA  
AATTACGGCTATCTTACTTCTTTATCTTGCCTGTATTGGCGGGTGCAATTACTATGCT  
TTTAACTGATCGGAATTTAATACTGCATTTTTGATCCAGCAGGAGGTGGAGATCCTAT  
TTTATATCAACATTTGTTT

>flavus

AACCAAGAAATTTAGTCATTCTTTTATGGTAAAAAGACAGTTATACAGA-TATAATCATT  
AGATCTTTAGTAGAGGAGTAAATCTATATACTGAAAGTTATACTAGGAGTGGTTT-ACT  
TATGTTGAATCTGTGACAGCTTTAAGGGAACTGGGATTGGATACCCATTATTTTTGGT  
CGTAAATTTAGTT--TAGACTTACCAGAGTACTACGAATGTTTAAAACTCAAAGGGCTTG  
GCGGTGTTTTAGACCTCTCAGGGGAACCTGTCTCGTAATCGACAATCCACGTTAGACCTA  
ACCCTTTGTGGTAATACAGCCTGTATACCGTCGTCAGGTAACCTTCTTAAATATAGT  
AGTTAGCTTGAGAATC--AG-ATTAATTAACGTCAGATCAAGGTGCAGCTAATAAAAG  
GGTGAGGATGGGTTACAATTATATATTTGTAAATTACAGCACT-TGAAATGAAGTGC-TTA  
AAGGAGGACTTGAAAGTAATTTTAGTTATATAAGTAAATGAATAAGGCTCTGAAACGTG  
CAGAATTTTAATGGTGAACAGACCAACCCCTAAAGACTTCTGCATCTTTAGGATATTCT  
GGTCCAACATCGAGGTCACAAACCTTTTTTCGATATGGGCTCTTAAAAAGATAATGCT  
GTTATCCCTACGGTAACCTAATTCTTTGATCAAAAATTT-TGGATCAAC-ACAAGTAAGG  
TTTA-AAAGGAGGCTTTAATTACTCCTCGGTTGCCCCAACCAAAGT--GTTAATAGCTT  
T-TCTTTTA-CTTAATTG--ATAAAACCTACTAATTTCTCTTAAGCTCGATAGGGTCTTC  
TTGTCTTTTAATAATTTTGGACTTTTTCATCCAAAAATAAAATTCTAAATAATCAAAAA  
GAGACAGATGTATTCTTGTTAAACCATTCATTCCAGCCTTCAATTATAAGGCAAATGATT  
ATGCTACCTTTGCACGGTCAGAGTACCGCGGCCGTT-TAAAA-CACTGGGCAGGTCCGAC  
TTCATATTTGAT-TTCGACATGACATTGTATTTTTATTTGGGATATGATCTGGTTTAGT  
TGGAACGGCTTTAAGGTTATTAATTCGTGCAGAGTTAGGACAGCCGGGGGCTTACTTGG  
AGACGATCAGCTATATAATGTAATTGTAACAGCCCATGCTTTTGTATAATTTTTTTTTT  
AGTAATACCTATAATGATTGGGGGTTTTGGAAATTGACTGGTACCATTAAATGTTAGGGGC



TCCAGATATAGTGTTCCTCGTTTGAATAATATAAGTTTTGGCTTCTCCTCCGGCGCT  
TTTACTTCTCTTATCATCAGCTGCGGTAGAAAGTGGAGTGGGTACGGGATGAACTGTGTA  
TCCACCTTTGGCTGGAAATTTAGCTCATGCCGGTGGTTCTGTAGATTTGGCGATTTTTTC  
TTTACATCTTGCTGGGGTGTCTTCTATTTTAGGTGCGGTGAATTTCACTACCACGATTAT  
TAATATGCGATGACAGGGAATAAAATTTGAGCGCTTTCTTTGTTTGTCTGATCAGTAAA  
AATTACGGCTATTTTACTTCTTTTGTCTTGCCTGTATTAGCGGGTGTATTACTATGCT  
TTTAACCGATCGAAATTTTAATACTGCCTTTTTTGATCCAGCAGGAGGTGGTGATCCAAT  
CTTGATCAACACTTGTTT

>ochroleucus

AACCAAGAAATTTAGTCATTCTTTTATGGTAAAAAGACAGTTATACAGA-CATAATCATC  
AGATCTTTAGTAGAGGAGTAAAATCTATACTGAAAGTTATACTAGAAGTGGTTT-ACT  
TATGTTGAATCTGTGACAGCTTTAAGGGAACTGGGATTGGATACCCATTATTTTTAGT  
CGTAAATTTAGTT--TAAACTTACCAGAGTACTACGAATGTTTAAACTCAAAGAGCTTG  
GCGGTGTTTTAGACCTCTCAGGGGAACCTGTCTCGTAATCGACAATCCACGTTAGACCTA  
ACCCTTTGTGGTAATACAGCCTGTATACCGTCGTCGCCAGGTAAGTTCTTAAATATAGT  
AGTTAGCTTGAGAATT--AA-ATTAATTAAGACGTCAGATCAAGGTGCAGCTAATAAAAG  
GGTGAGGATGGGTTACAATTATATTTGTAATTACGGCACT-TGAAATGAAGTGC-TTA  
AAGGAGGACTTGAAAGTAATTTTAATTATATGAGTAAATGAATAAGGCTCTGAAACGTG  
CAGAATTTTAATGGTCGAACAGACCAACCCTTAAGACTTCTGCATCTTTAGGACATTCT  
GGTCCAACATCGAGGTCACAAACCTTTTTTTCGATATGGGCTCTTGAAAAAGATAATGCT  
GTTATCCCTACGGTAACATAATTCCTTTGATCAAAATTTT-TGGATCAGT-ACAAGTAAGA  
CTTA-AAAGGAGGCTCTAGTTACTCCTCGGTTGCCCAACCAAAGT--GTTAATAGCTT  
T-TCTTTTA-CTTAATTG--ATGAAACCTACTAATTTCTCTTAAGCTCGATAGGGTCTTC  
TTGTCTTTTAATAATATTTGGACTTTTTCATCCAAAATAAAATTCTAAATAATCAAAAA  
GAGACAGGTGTATTCTTGTCAAACCATTCATTCCAGCCTTCAATTATAAGGCAAATGATT  
ATGCTACCTTTGCACGGTCAGAGTACCGCGGCCGTT-TAAAA-CACTGGGCAGGTCCGAC  
TTCATATTTAAT-TCCAACATGACATTGTATATTTTATTTGGGATATGATCTGGTTTAGT  
TGGAACGGCTTTAAGATTGTTGATTTCGTGCAGAGTTAGGGCAGCCGGGGGCTTTACTTGG  
AGATGATCAGCTATATAATGTGATTGTAACGGCCCATGCTTTTGTATAATTTTTTTTTT  
AGTAATACCCATGATGATTGGAGGTTTTGGGAATTGATTGGTACCGTTAATGTTAGGGGC  
TCCAGATATGGTGTTTCTCGCTTGAATAATATAAGTTTTTGGCTTCTCCTCCAGCGCT  
TTTACTTCTTTTATCATCAGCTGCGGTAGAAAGTGGGGTAGGTACGGGATGAACTGTGTA  
TCCACCTTTGGCTGGGAATTTAGCTCATGCCGGTGGTTCTGTAGATTTGGCAATTTTTTC  
TTTACATCTTGCTGGGGTGTCTTCTATTTTAGGGGCGGTGAATTTCACTACAATTAT  
TAATATGCGATGACAGGGAATAAAATTTGAGCGTCTTTCCTTGTTTGTCTGATCAGTAAA  
AATTACGGCTATTTTACTTCTTTTATCTTGCCTGTATTAGCGGGTGTATTACTATGCT  
TTTGACCGATCGAAATTTTAATACTGCATTTTTTGATCCAGCAGGAGGTGGTGATCCAAT  
CTTATATCAACATTTGTTT

>radiatus

AACCAAGAAATTTAGTCATTCTTTTATGGTAAAAAGACAGTTATACAGG-TATGATTATG  
AGACCTTTAGTAGAGGAGTAAAATCTATACTGAAAGTTATACTAGAAGTAATTT-ATT  
TATGTTGAATCTGTGACAGCTTTAAGGGAACTGGGATTGGATACCCATTATTTTTAGT  
CGTAAATTTAGTT--TAAACTTACCGGAGTACTACGAATATTTAAACTCAAAGGGCTTG  
GCGGTGTTTTAGACCTCTCAGGGGAACCTGTCTCGTAATCGACAATCCACGTTAAACCTA  
ACCCTTTTTGGTAATACAGCCTGTATACCGTCGTCAGGTAAGTTCTTAAATATAGT  
AGTTGGCTTGAGAATC--AG-ATTAATTAACCGTCAGATCAAGGTGCAGCTAATAAGAG  
GGTGAGGATGGGTTACAATTACATATTTGTAATTACGGTGCT-TGAAATAGAGTGC-TTA  
AAGGAGGACTTGAAAGTAATTTTAATTATATAAATAAAATGAATAAGGCTCTGAAACGTG

CAGAATTTTAATGGTCGAACAGACCAACCCTTAAAGACTTCTGCATCTTTAGGATATTCT  
GGTCCAACATCGAGGTCACAAACCTTTTTTCGATATGGGCTCTTAAAAAGATAATGCT  
GTTATCCCTACGGTAACATAATTCTTTGATCAAAAATTT-TGGATCGAT-ACAAGTAAGA  
TTTA-AAAGGAGGCTCTAGTTACTCCTCGGTTGCCCCAACCAAAGT--ATTTAATAGTTT  
T-TCTTTTA-CTTAATTT--GCATAGCCTACTAATTTCTCTCAAGCTCGATAGGGTCTTC  
TTGTCTTTTAATAATATTTGGACTTTTTCATCCAAAAATAAAATTCTAAACAATCAAAAA  
GAGACAGGTGTATTCTTGTCAAACCATTCAATCCAGCCTTCAATTATAAGGCAAATGATT  
ATGCTACCTTTGCACGGTCAGAGTACCGCGGCCGTT-TAAAA-CACTGGGCAGGTCCGAC  
TTCATATTTAAT-TTTAACATGACATTGTATATTTTATTTGGAATGTGGTCTGGTTTAGT  
TGGAACGGCTTTAAGGCTATTAATTCGTGCAGAATTAGGGCAGCCGGGGGCTTTACTTGG  
AGATGATCAACTGTATAATGTGATTGTAAGTCCCATGCTTTTGTATAATTTTTTTCTT  
AGTGATACCTATAATGATTGGGGGTTTTGGAAATTGGTTGGTACCGCTAATATTAGGGGC  
TCCAGATATGGTGTTTCTCGTTTGAATAATATAAGTTTTTGGCTTCTTCTCCAGCACT  
TCTACTTCTTCTATCATCAGCTGCAGTGGAAAGTGGGGTAGGTACGGGGTGGACTGTATA  
TCCACCTTTAGCCGGAATTTGGCTCATGCCGGTGGTTCTGTAGACCTGGCAATTTTCTC  
TTTACATCTTGCTGGGGTGTCTTCTATTTTAGGGGCAGTGAACCTTTATTACTACAATTAT  
TAATATACGATGACAGGGAATAAAATTTGAGCGTCTTTCCTTGTGTTTGGTCAGTGAA  
AATTACGGCTATTTTACTTCTTGTCTTTACCTGTATTAGCGGGTGCAATTACTATGCT  
TCTAACTGATCGGAATTTAATACTGCATTCTTGATCCAGCAGGAGGTGGTGATCCCAT  
CTTATATCAACATCTGTTT

>parius

AACCAAGAAATTTAGTCATTCTTTTATGGTAAAAAGACAGTTATACAAG-TATGATCATA  
GGATCTTTAGTAAAGGAGTAAAATCTACATACTAAAAGTTATACTAGACGTGATTT-ATT  
TATGTTGAGTCTGTGACAACTTTAAGGGAACTGGGATTGGATACCCATTATTTTAGT  
CGTAAATTTAGTT--TAAACTTACCAGAGTACTACGAATATTTAAACTCAAAGGGCTTG  
GCGGTGTTTTAGACCTCTCAGGGGAACCTGTCTCGTAATCGACAATCCACGTTAGACCTA  
ACCCTTTGTGGAATACAGCCTGTATACCGTCGTCGTCAGGTAACCTTCTTAAATATAGT  
AGTTAGCTTGAGAATA--TG-ATTAATTAACCGTCAGATCAAGGTGCAGCTAATAAAGG  
GGTGAGGATGGGTACAATTACATATTTGTAATTACGGCACT-TGAAATGAAGTGC-TTA  
AAGGAGGACTTGAAAGTAATTTTGAATTATATAAATAAAATGAATAAGGCTCTGAAACGTG  
CAGAATTTTAATGGTCGAACAGACCAACCCTTAAAGACTTCTGCATCTTTAGGATATTCT  
GGTCCAACATCGAGGTCACAAACCTTTTTTCGATATGGGCTCTTAAAAAGATAATGCT  
GTTATCCCTACGGTAACATAATTCTTTGATCAAAAATTT-TGGATCAAT-ACAAGTAAGA  
TTCA-AAAGGAGGCTCTAGTTACTCCTCGGTTGCCCCAACCAAAGT--TTTTAATAGTTT  
T-TCTTTTA-CTTAATTA--ACATAGCCTACTAATTTCTCTTAAGCTCGATAGGGTCTTC  
TTGTCTTTTAATAATATTTGGACTTTTTCATCCAAAAATAAAATTCTAAACAATCAAAAA  
GAGACAGGTGTATTCTTGTCAAACCATTCAATCCAGCCTTCAATTATAAGGCAAATGATT  
ATGCTACCTTTGCACGGTCAGAGTACCGCGGCCGTT-TAAAA-CACTGGGCAGGTCCGAC  
CTCATATTTAAT-TTTAACATGACATTATATATTTTATTTGGAATATGATCTGGTTTAGT  
TGGAACGGCTTTAAGGTTGCTAATTCGTGCAGAATTAGGGCAACCTGGGGCCTTACTTGG  
AGATGATCAACTTTATAATGTGATTGTAAGTCCCATGCTTTTGTATAATTTTTTTCTT  
AGTGATACCTATGATAATTGGGGGTTTTGGGAATTGATTAGTACCGTTGATATTAGGGGC  
TCCAGATATAGTGTTTCTCGTTTGAATAACATGAGTTTTTGACTTCTTCTCCGGCACT  
TTTACTTCTTTTGTGCATCAGCTGCAGTAGAAAGTGGGGTAGGTACAGGATGAAGTGTATA  
TCCACCTTTGGCTGGGAATTTGGCCCATGCCGGTGGTTCTGTAGATCTAGCAATTTTTTC  
TTTGATCTTGCTGGGGTGTCTTCTATTTTAGGGGCGGTAACTTTATTACTACAATTAT  
TAACATACGATGACAGGGAATAAAGTTTGAACGCCTTTCCTTGTGTTTGTGATCGGTAA  
AATTACAGCTATCTTACTTCTTTTATCTTGCCTGTATTAGCGGGTGCAATTACTATGCT

TCTGACCGATCGGAATTTTAATACTGCATTTTTTGATCCAGCAGGAGGTGGTGATCCTAT  
CTTATATCAACATTTATTT

>lynceus

AACCAAGAAATTTAGTCATTCTTTTATGGTAAAAAGACAGTTATACAAA-TATAATCATA  
AGATCTTTGGTAGAGGAGTAAAATCTATATACTAAAAGTTATACTAGAAGTGATTT-ACT  
TATGTTGAATCTGTGACAGCTTTAAGGGAACTGGGATTGGATACCCCATTTTATTTAGT  
CGTAAATTTAGTT--TAAGCTTACCAGAGTACTACGAATGTTTAAAACCTCAAAGGGCTTG  
GCGGTGTTTTAGACCTCTCAGGGGAACCTGTCTCATAATCGACAATCCACGTTAGACCTA  
ACCTTTTATGGTAATACAGCCTGTATACCGTCGTCGTCAGGTAACCTTCTTAAAATATAGT  
AGTTAGCTTGAGAATC--AG-ATTAATTTAAACGTCAGATCAAGGTGCAGCTAATAAAAG  
GGTGAGGATGGGTACAATTATATTTATAATTATGGCACT-TGAAATGAAGTGC-TTA  
AAGGAGGACTTGAAAGTAATTTTAATTATATAAATAAAATGAATAAGGCTCTGAAACGTG  
CAGAATTTTAATGGTCGAACAGACCAACCCTCAAAGACTTCTGCATCTTTAGGACATTCT  
GGTCCAACATCGAGGTCACAAACCTTTTTTTCGATATGGGCTCTTGAAAAAGATAATGCT  
GTTATCCCTACGGTAACTAATTCCTTTGATCAAAATTCT-TGGATCAAC-ACAGGTAAGA  
TTTA-AAAGGAGGCTCTTATTGCTCCTGGTTGCCCAACCAAAGT--GTTTAATAGCTT  
T-TCTTTTA-CTTGATTG--ATATAGCCTATTAATTTTTCTGAAGCTCGATAGGGTCTTC  
TTGTCTTTTAATAACATCTGGACTTTTTCATCCAAAAATAAAATTCTAAACAATCAAAAA  
GAGACAGGTGTATTCTTGTCAAACCATTCAATCCAGCCTCAATTATAAGGCAAATGATT  
ATGCTACCTTTCACGGTCAGAGTACCGCGGCCGTT-TAAAA-CACTGGGCAGGTCCGAC  
TTCATATTTAAT-TTTGACATGACATTATATATTTTGTGGAAATGTGATCTGGTTTAGT  
TGGAACGGCTTTGAGATTACTGATTCGTGCAGAATTAGGGCAGCCGGGTGCTTTACTTG  
AGATGATCAATTATATAATGTTATCGTAACGGCTCATGCTTTGTTATAATTTTTTTTT  
AGTGATGCCTATGATAATTGGGGGTTTTGGTAATTGATTGGTACCACTAATGTTAGGGGC  
TCCAGATATAGTATTTCTCGTTTGAATAATATAAGTTTTTGGCTTCTCCTCCAGCACT  
TTTACTTCTTCTATCATCAGCTGCGGTGGAAAGCGGGGTAGGCACAGGATGGACTGTATA  
TCCTCCTTTAGCTGGGAATTTGGCTCACGCCGGTGGTTCTGTAGATCTGGCGATTTTTTC  
TTTACATCTTGCTGGGGTTTTCTTATTTTAGGGGCGGTAAATTTCAATACCACAATTAT  
TAATATACGGTGACAGGGGATAAAATTTGAACGTCTTCTTTGTTGTATGATCGGTAA  
GATTACAGCTATTTTACTTCTTTTATCTTTCCTGTATTAGCGGGTGCAATTACTATGCT  
TTTAACTGATCGGAATTTTAATACTGCATTCTTTGATCCAGCAGGAGGTGGTGATCCTAT  
TTTATACCAGCATTTATTT

>pica

AACCAAGAAATTTAGTCATTCTTTTATGGTAAAAAGACAGTTATACAGA-TATAATCATT  
AGATCTTGAGTAAAGGAGTAAAATCTATATACTGAAAGATATGCTAAGCATGGTTT-ACT  
TATGTTGAAGCTGTGATAGCTTTAAGGGAACTGGGATTGGATACCCCATTTTATTTAGT  
CGTAAATTTAGTT--TAAGCTTACCAGAGTACTACGAATTTTTAAAACCTCAAAGGGCTTG  
GCGGTGTTTTAGACCTCTCAGGGGAACCTGTCTCATAATCGACAATCCACGTTAAACCTA  
ACCTTTTATTGTAATGCAGCCTGTATACCGTCGTCGCCAGGTAACCTTCTTAAAATATAGT  
AGTTAGCTTGAGAATT--TT-ATTAATTAGAACGTCAGATCAAGGTGCAGCTAATGAAAG  
GGTGAGGATGGGTACAATTATATTCATAATGACGGCACT-TGAAATATAAAGTGTTA  
AAGGAGGACTTGAAAGTAATTTTAATTATATAAATAAAGTGAATAAGGCTCTGAAACGTG  
CAGAATTTTAATGGTCGAACAGACCAACCCTTAAAGGCTTCTGCACCTTTAGGACATTCT  
GGTCCAACATCGAGGTCACAAACCTTTTTTTCGATATGGGCTCTTGAAAAAGATAATGCT  
GTTATCCCTACGGTAACTAATTCCTTTAATCAAAAATCT-TGGATCAAC-ACAAGTAAAG  
TTTA-AAAGGAGGCTCGAATTGCTCCTCGTTGCCCAACCAAAGT--ATTTAATAGCTT  
T-CCTTTTATCATAATTG--GTAAAGCCTATTAATTTTTCTAAAGCTCGATAGGGTCTTC  
TTGTCTTTTAATACTATCTGGACTTTTTCATCCAAAAATAAAATTCTAAATAATCAAAAA

GAGACAGGTGTATTCTTGTCAAACCATTCATTCCAGCCTTCAATTATAAGGCAAATGATT  
ATGCTACCTTTGCACGGTCAGAGTACCGCGGCCGTT-TAAAA-CACTGGGCAGGTCCGAC  
TTCGTATTTAAT-TTTGACACGACATTATATATTTTGTGGGATGTGATCAGGCTTGGT  
TGGAACGGCTTTAAGACTATTAATTCGTGCAGAACTAGGACAGCCTGGTGCATTACTTGG  
AGACGATCAGCTATATAATGTCATTGTAACGGCCCATGCTTTTGTATGATTTTTTCTT  
AGTGATGCCCATAATAATTGGAGGTTTTGGAACTGATTAGTGCCATTGATGTTAGGGGC  
TCCAGACATAGTATTTCTCGTTTGAATAATATAAGTTTTTGGCTTCTTCTCCAGCGCT  
GTTACTTCTTTTGTGTCAGCTGCAGTGGAAAGAGGGGTGGGCACAGGATGAACTGTATA  
TCCTCCTTAGCTGGAAATTTAGCTCATGCCGGTGGTCTGTAGATCTGGCAATTTTTTC  
TTTACATCTTGCTGGGGTCTCTTCTATTTTGGGGCGGTAAATTTTATTACTACAATTAT  
TAATATGCGATGGCAGGGAATAAAATTTGAGCGTCTTCTTTGTTTGGTTCGGTAAA  
AATTACGGCTATTTTACTTCTTTTGTCTTTCCTGTATTAGCGGGCGCAATTACTATGCT  
TTTAACTGATCGAAATTTTAATACTGCATTTTTTATCCAGCGGGAGGCGGGGATCCTAT  
TTTATATCAACATTTATTT

>spectrum

AACCAAGAAATTTAGTCATTTGTTTATGGTAAAAAGACAGTTATACAAA-TATAATCATT  
AGATCTTCAGTAAAGGAGTAAATCTAAATACTGAAAGCTATTCTAGGCGTGATAT-ACT  
TATGTTGAATCTGTGATAGCTTTAAGGGAACTGGGATTGGATACCCATTATTTTAGT  
CGTAAATTTAGTT--AATACTACCAGAGTACTACGAATATTTAAACTCAAAGGGCTTG  
GCGGTGTTTTAGACCTCTCAGGGGAACCTGTCTCGTAATCGACAATCCACGTTAAACCTA  
ACCTTTTATGGTAATACAGCCTGTATACCGTCGTCGTCAGGTAACCTTCTTAAATATAGT  
AGTTAGCTTGAGAATT--TC-ATTAATTAGGACGTCAGATCAAGGTGCAGCTAATAAAAG  
GGTGAGGATGGGTACAATTACATATTTGTAATTACAGCACT-TGAAATTGAGTGT-CTA  
AAGGAGGACTTGAAAGTAATCTTAATTATCTAAATAAAATGAATTGGGCTCTGAAACGTG  
CAGAATTTAATGGTGAACAGACCAACCTTTTTCGATATGAACTCTTAAAAAAGATAATGCT  
GTTATCCCTACGGTAACATAATTCTTTGATCAAACTTT-TGGATCAAC-ACAAGTAAGA  
TTTA-AAAGGAGGTTTAACTGCTCCTCGGTTGCCCAACCAAAGT--GTTAATAGTTT  
TATTTTTTA-CTTAATTA--ATAAAACCTACTAATTTTTCTGAAGCTCGATAGGGTCTTC  
TTGTCTTTTAATAAAATTTGGACTTTTTTATCCAAAAATAAAATCTATAAAGTCAGAAA  
GAGACAGGTGTATTCTTGTCAAACCGTTTATTCCAGCCTTCAATTATAAGGCAAATGATT  
ATGCTACCTTTGCACGGTCAGAGTACCGCGGCCGTT-TAAAA-CACTGGGCAGGTCCGAC  
TTCGTATTTAAG-CCTAACACGACATTATATATTTTATTTGGGATGTGATCCGGCTTAGT  
TGGAACGGCCTTAAGATTGTTAATTCGTGCAGAGTTAGGGCAACCCGGTGCTTACTCGG  
AGATGATCAACTATATAATGTAATTGTAACAGCCCATGCTTTTGTATATAATTTTTTCTT  
AGTGATACCCATGATAATTGGGGTTTTGGAAATTGGTGGTGCCATTAATGTTAGGAGC  
TCCAGACATAGTATTTCTCGTTGAATAATATGAGTTTTTGAATCCTTCTCCAGCGCT  
TTTACTTCTTTTGTGTCAGCCGTCAGTAGAAAGTGGAGTAGGTACAGGGTGAACGTGATA  
TCCACCTTTAGCCGGAATTTAGCTCATGCCGGCGGTTCTGTAGATCTGGCAATTTTTTC  
TTTACATCTTGCTGGTGTGTCTTCTATTTTAGGGGTCAGTAACTTCATTACCACAATTAT  
TAACATACGATGACAGGGAATAAAATTTGAACGTCTTCTTTGTTTGGTTCAGTAAA  
AATTACAGCTATTTTACTTCTTTTATCATTACCTGTATTGGCGGGTGCAATTACTATGCT  
TCTAACTGATCGAAATTTTAATACTGCGTTTTTGAACCCAGCAGGAGGTGGTGATCCTGT  
TTTATATCAACATTTGTTT

>cervus

AACCAAGAAATTTAGTCATTTTATGGTAAAAAGATAGTTAGGCAAA-TAAACTATT  
AGATCTTTAGTAAAGGAGTAAATCTAAATACTAAAGTTATACCAAATGTAGTTT-ATT  
TACGTTGAATCTGTGACAGCTTTAAGGGAACTGGGATTGGATACCCCATTTTATTTAGT

TATAAATTTAGTT--TATGCTTACCGGAGTACTACGAATGTTTAAAACTCAAAGGGCTTG  
GCGGTGTTTTAGACCTCTCAGGGGAACCTGTCTCGTAATCGACAATCCACGTTAAACCTA  
ACCTTTTGTAGTAATACAGCTTGTATACCGTCGTCGCCAGGTAACCTCTTAAAAATATAGT  
AGTTAGCGTGATAATT--TT--TAAATTTAAACGTCAGATCAAGGTGCAGCTAATAAGAA  
GGTGAGGATGGGTTACAATTACATATTTGTAAATACGGCACT-TGAAATTGAGGGTTTTA  
AAGGAGGACTTGAAAGTAATTTTGATTATATAAGCAAAATGAATACGGCTCTGAAACGTG  
CAGAATTTTAATGGTGAACAGACCAACCCTTAAAGACTTCTGCATCTTTAGGACATTCT  
GGTCCAACATCGAGGTCACAAACCTTTTTTCGATATGGGCTCTTAAAAAAGATAATGCT  
GTTATCCCTACGGTAACATAATTCTTTGATCAAAAATTT-TGGATCAAC-ACAAGTAGGA  
TTTA-AAAGGAGGTTCTATATGCTCCTCGGTTGCCCCAACCAAAGT--ACTTAATAGTTT  
TGTCTTCTA-CTTAATTG--AT-AGATCTATTAATTTTTCTGAAGCTCGATAGGGTCTTC  
TTGTCTTTTACTAAAATTTGGACTTTTTCATCCAAAAATAAAATTCTAAATAATCTAAAA  
GAGACAGCTGTATTCTTGTCAAACCATTCAATCCAGCCTTCAATTATAAGGCAAATGATT  
ATGCTACCTTTGCACGGTCAGAGTACCGCGGCCGTT-TAAAA-CACTGGGCAGGTCCGAC  
TTCGCATCTAGA-GCCTACGCGACATTATATATTTTATTTGGAATATGATCAGGACTGGT  
GGGAACCTGCCTAAGACTTTTGATTTCGTGCGGAGTTGGGGCAACCTGGTGCCCTACTTGG  
GGACGATCAGTTATATAATGTTATTGTAACAGCCCATGCTTTTGTATAATTTTTTTCTT  
AGTGATGCCTATAATGATTGGGGGGTTTGGAAATTGATTGGTACCGTTGATGTTGGGGGC  
TCCAGATATGGTATTTCTCGTTTAAATAACATAAGTTTCTGACTTCTCCTCCTGCACT  
TTTACTTCTCCTGTCTTCGGCCGCGGTGGAAAGCGGAGTGGGAACAGGGTGAAGTGTATA  
TCCCCCTTTGGCAGGAAATCTGGCTCATGCTGGTGGTTCTGTAGATCTGGCAATTTTTTC  
TCTACATCTTGCTGGTGTATCTTCTATTTTGGGAGCGGTAAATTTTATTACTACAATTAT  
TAACATACGATGACAGGGAATGAAATTTGAACGCTTTCACTTTTTGTGTGATCAGTAAA  
AATTACAGCTATTTTACTTCTTCTGTCTTGCCTGTTTTAGCGGGTGCTATTACTATACT  
TTTAACTGGTCGAAATTTAATACTGCTTCTTTGATCCAGCAGGAGGCGGTGATCCTAT  
TTTGTATCAACACTTGTTT

>dusavelli

AACCAAGAAATTTAGTCATTCTCTCATGGTAAAAAGACAGTTAGGCAAA-CAAGATTATT  
AGACCTTTAGTAAAGGAGTAAATCTAAATACTAAAAGTTATACCGGGTGTAGTCT-ACC  
TATGTTGAATCTGTGACAGCTTTAAGGGAACTGGGATTGGATACCCATTATTTTTAGT  
TATAAATTTAGTT--TATGCTTACCAGAGTACTACGAATGTTTAAAACTCAAAGGGCTTG  
GCGGTGTTTTAGACCTCTCAGGGGAACCTGTCTCGTAATCGACAATCCACGTTAAACCTA  
ACCTTTTGTAGTAGCACAGCCTGTATACCGTCGTCAGGTAACCTCTTAAAAATATAGT  
AGTTAGCATGAGAATT--TT-ATAAATTTAAACGTCAGATCAAGGTGCAGCTAATAAAAA  
GGTGAGGATGGGTTACAATTACATATTTGTAAATACGGCACT-TGAAATGAAGAGTTTCA  
AAGGAGGACTTGAAAGTAATTTTGATTATATAGACAAAATGAATACGGCTCTGAAACGTG  
CAGAATTTTAATGGTGAACAGACCAACCCTTAAAGACTTCTGCATCTTTAGGATATTCT  
GGTCCAACATCGAGGTCACAAACCTTTTTTCGATATGGGCTCTTAAAAAAGATAATGCT  
GTTATCCCTACGGTAACATAATTCTTTGATCAAAAATTT-TGGATCGAC-ACAAGTAGGA  
TTTA-AAAGGAAGCTTTATATGTTCTCCTCGGTTGCCCCAACCAAAGT--ACTTAATAGTTT  
TGTCTTTTA-TCTAATTG--AT-AAGTCTATTAATTTTTCTGAAGCTCGATAGGGTCTTC  
TTGTCTTTTACTAGAATTTGGACTTTTTCATCCAAAGATAAAATTCTAAATAATCTTAAA  
GAGACAGCTGTATTCTTGTCAAACCATTCAATCCAGCCTTCAATTATAAGGCAAATGATT  
ATGCTACCTTTGCACGGTCAGAGTACCGCGGCCGTT-TAAAA-CACTGGGCAGGTCCGAC  
TTCGATTTTAGA-ACCTACACGACATTATATATCTTATTCGGAATATGATCAGGACTAGT  
GGGAACCTGCCCTAAGACTCTTAATTCGTGCGGAGTTGGGACAACCTGGTGCTTTACTCGG  
AGATGATCAGCTATATAATGTAATTGTGACAGCCCATGCTTTTGTATAATTTTTTTCTT  
AGTAATGCCTATAATGATTGGGGGATTGGAAACTGGTTGGTACCTTTAATACTAGGGGC

CCCAGATATGGTGTTCCTCGCTTAAATAACATAAGTTTCTGACTTCTTCCTCCTGCGCT  
TTTACTTCTTCTATCCTCGGCTGCAGTAGAGAGTGGGGTAGGAACAGGATGAACTGTGTA  
TCCTCCTTTGGCAGGAAATTTAGCTCATGCTGGTGGTTCTGTAGATCTGGCAATTTTTTC  
CTTACATCTTGCTGGTGTATCTTCTATTTTGGGGGCGGTAAATTTTATTACTACAATTAT  
CAATATACGATGACAAGGAATGAAATTTGAACGGCTTTCGCTTTTTGTATGGTCGGTAAA  
AATTACGGCCATTTTACTTCTTTTATCTTTACCTGTTTTGGCTGGAGCCATTACTATGCT  
TTTAACTGATCGAAATTTTAATACTGCTTCTTTGACCCAGCAGGAGGTGGTGATCCTAT  
TTTATATCAGCACTTGTTT

>auricomus

AACCAAGAAATTTAGTCATTCTTTTATGGTAAAAAGACAGTTAGGCAGA-AAGAATCATT  
AGACCCCTAGTATAGGAGTAAATCTAGATACTAAGAGTTATACCGGGTGTGATTT-ATT  
AGTGTTGAATCTGTGATAGCTTTAAGGGAACTGGGATTGGATACCCCATTTTATTTAGT  
TGTAATTTAGCT--TAGGCTTACCAGAGTACTACGAATGTTTAAACTCAAAGGGCTTG  
GCGGTGTTTTAGACCTCTCAGGGGAACCTGTCTCATAATCGACAATCCGCGTTAAACCTA  
ACCTTTTATAGCAACACAGCCTGTATACCGTCGTCGTCAGGTAACCTCTTAAATATAGT  
AGTTAGCTCGAGAATC--AG-GTTAATTAACCGTCAGATCAAGGTGCAGCTAATAAAAA  
GGTGAGGATGGGTTACAATTACAAATTTGTAAATACGGTACT-TGAAATTAAGTATCCTA  
AAGGAGGACTTGAAAGTAATTCTAATTATATAAATAGGATGAATAGGGCTCTGAAACGTG  
CNNNNNNNNNNNGGTGCAACAGACCAACCCTCAAAGACTTCTGCATCTTTAGGACATTCT  
GGTCCAACATCGAGGTCACAAACCTTTTTTTCGATATGGGCTCTGAAAAAGATAATGCT  
GTTATCCCTACGGTAACATAATCCTTTGATCAAAAAGTT-TGGATCAAC-ACAAGCAAGA  
TTTG-AGAGGAGGCTTTGTTTACTCCTTGGTTGCCCCAACCAAAGT--ATTTAATAGTTT  
T-CTTTTTC-CCCGATTA--GTAAAGTCTATTAATTTCTCTAAAGCTCGATAGGGTCTTC  
TTGTCTTTTAATCACATCTGGACTTTTTTTCATCCAAAGATAAAATTCTAAGCAATCTAAAA  
GAGACAGGTGTATTCTTGTCAAACCATTCATTCCAGCCTTCAATTATAAGGCAAATGATT  
ATGCTACCTTTGCACGGTCAGAGTACCGCGGCCGTT-TAAAA-CACTGGGCAGGTCCGAC  
TTCGTATTTAAT-ATTGACACGACATTGTATATTTTATTTGGTATATGATCTGGGTTGGT  
CGGAACGGCTCTGAGATTGTTAATTCGTGCAGAGCTAGGACAACCAGGTGCCTTGCTTGG  
AGATGATCAATTATATAATGTGATTGTAAACAGCTCATGCTTTTGTTATAATTTTTTTCTT  
AGTAATGCCCATGATAATTGGGGGTTTTGGGAACTGACTGGTGCCGCTAATGTTGGGAGC  
TCCAGATATAGTATTTCCGCGTTTAAATAATATGAGTTTCTGGCTTTTGCCCCCTGCACT  
TTTACTTCTTCTATCATCAGCAGCCGTGGAAAGAGGGGTAGGGACAGGATGAACTGTATA  
TCCACCTCTAGCTGGAAACTTAGCGCATGCCGGCGGGTCTGTAGATCTAGCAATTTTTTC  
TTTGATCTTGCTGGGGTTTCTTCCATTTTAGGGGCTGTAAATTTTATTACTACAATTAT  
TAATATACGATGACAAGGAATGAAGTTTGAGCGTCTTTCTTTGTTTCGTATGATCTGTAAA  
AATTACAGCTATTTTACTTCTTTTATCTTTACCTGTGCTGGCCGGGGCAATTACTATGCT  
CCTGACTGATCGAAATTTTAATACTGCCTTTTTTGACCCCGCAGGAGGCGGTGATCCTAT  
TTTGATCAGCACTTGTTT

>retifer

NNNNNNNNNNNNNNNNNNNNNNNNNTATGGT-AAAAGACAGTTAGGCAAA-AAGGATCATG  
AGACCCCTAGTATAGGAGTAAATCTAAATACTAAGAGTTATACCAGATATGATTT-ATT  
AGTGCTGAAGCTGTGATAGCTTTAAGGGAACTGGGATTGGATACCCCATTTTATTTAGT  
TGTAATTTAGTT--TAGACTTACCAGAGTACTACGAATGTTTAAACTCAAAGGGCTTG  
GCGGTGTTTTAGACCTCTCAGGGGAACCTGTCTCATAATCGACAATCCACGTTAGACCTA  
ACCTTCTATAGCAATACAGCCTGTATACCGTCGTCGTCAGGTAACCTCTTAAATACAGT  
AGTTAGCCCGAGAATC--AG-ATTAGTTAAACCGTCAGATCAAGGTGCAGCTAATAAAAA  
GGTGAGGATGGGTTACAATTACAAATTTGTAAATACGGTACT-TGAAATTAAGTATCTTA  
AAGGAGGACTTGAAAGTAATTCTAATTATATAGATAGGATGAATAGGGCTCTGAAACGTG

NNNNATTTTAATGGTCGAACAGACCAACCCTCAAAGACTTCTGCATCTTTAGGACATTCT  
GGTCCAACATCGAGGTCACAAACCTTTTTTCGATATGGGCTCTTAAAAAGATAATGCT  
GTTATCCCTACGGTAACTAATTCTTTGATCAAAAAGCT-TGGATCAAC-ACAAGCAAGA  
TTTA-AAAGGAGGCTTTATCTGCTCCTCGGTTGCCCCAACCAAAGT--ATTTAATAGCTT  
T-CCTTTTA-CTTAATTA--GTGAAGTCTATTAATTCTCTAAAGCTCGATAGGGTCTTC  
TTGTCTTTTAATTGCATCTGGACTTTTTCATCCAAAAATAAAATTCTAAGCAATCTAAAA  
GAGACAGGTGTATTCTTGTCAAACCATTCAATCCAGCCTTCAATTATAAGGCAAATGATT  
ATGCTACCTTTGCACGGTCAGAGTACCGCGGCCGTT-TAAAA-CACTGGGCAGGTCCGAC  
TTCGTATNNNNN-NNNNNNNNGACATTGTATATTTATTTGGTATATGATCCGGGTTGGT  
TGGAACGGCCCTGAGGTTACTAATTCGTGCGGAGTTGGGACAGCCAGGTGCCTTGCTTGG  
AGATGATCAGCTGTATAATGTGATTGTAACGGCCCATGCTTTTGTTATGATTTTTTCTT  
GGTAATGCCCATGATGATTGGGGGATTTGAAACTGACTGGTGCCGTTAATGTTAGGGGC  
CCCAGACATGGTATTTCCGCGCCTAAATAATATAAGTTTCTGGCTTTGCCTCCTGCACT  
TTTACTTCTTATCATCAGCAGCTGTGGAAAGAGGGGTAGGAACGGGATGAAGTGTATA  
TCCGCCTTTAGCTGGGAATTTAGCGCATGCCGGTGGGTCTGTAGATCTAGCAATTTTCTC  
TCTACACCTTGCTGGGGTTTCTTCTATTTTAGGGGCTGTAAATTTTATTACTACAATTAT  
TAACATACGATGACAAGGAATGAAGTTTGAACGTCTTTCTTTGTTTGTATGATCAGTAAA  
AATTACAGCCATTTGCTTCTTCTATCTTACCTGTATTAGCTGGGGCTATTACTATGCT  
CCTGACTGATCGAAATTTAATACCGCCTTTTTTGACCCTGCAGGAGGTGGGGATCCTAT  
TTTATATCAACACTTATTT

>gloriamaris

AACCAAGAAATTTAGTCATTCTTTTATGGTAAAAAGACAGTTAAGCAGA-GAGGATCATT  
AGATCCTTAGTACAGGAGTAAAATCTAAATACTAAGAGTTATACCTGACATGGTTT-ATT  
AGTGCTGAATCTGTGATAGCTTTAAGGGAACTGGGATTGGATACCCCATTTTATTTAGT  
TGTAATTTAGTT--AAGACTTACCGGAGTACTACGAATGTTTAAAACTCAAAGGGCTTG  
GCGGTGTTTTAGACCTCTCAGGGGAACCTGTCTCATAATCGACAATCCACGTAAACCTA  
ACCTTTTATAGCGATACAGCTTGTATACCGTCGTCGTCAGGTAACCTCTTAAAAATAGT  
AGTTAGCCCGAGAATC--AA-GTTAATTAACAGTCAGATCAAGGTGCAGCCAATAAAAA  
GGTGAGGATGGGTACAATTATATTTGTAAATACGGTACT-TGAAACAAAGTATCTTA  
AAGGAGGACTTGAAAGTAATTCTAATTATATAAACAGGATGAATAAGGCTCTGAAACGTG  
CAGAATTTTAATGGTCGAACAGACCAACCCTTAAAGACTTCTGCATCTTTAGGACATTCT  
GGTCCAACATCGAGGTCACAAACCTTTTTTCGATATGGGCTCTTAAAAAGATAATGCT  
GTTATCCCTACGGTAACTAATTCTTTGATCAAAAAGTTT-TGGATCAAC-ACAAGCAAGA  
TTTA-AAAGGAGGCTTTGCTTACTCCCGGTTGCCCCAACCAAAGT--ATTTAATAGTTT  
T-CTTTTA-TTTAATTA--GTAAACTCTATTAATTTCTCTAAAGCTCGATAGGGTCTTC  
TTGTCTTTTAATTATATCTGGACTTTTTCATCCAAAAATAAAATTCTAAGCAATCTAAAA  
GAGACAGGTGTATTCTTGTCAAACCATTCAATCCAGCCTTCAATTATAAGGCAAATGATT  
ATGCTACCTTTGCACGGTCAGAGTACCGCGGCCGTT-TAAAA-CACTGGGCAGGTCCGAC  
TTCGTATTTAAC-ACTGACACGACATTGTATATTTTGTTTGGTATATGATCTGGATTAGT  
TGGAACGGCCCTAAGGCTATTGATTCGTGCAGAGTTAGGACAACCAGGTGCCTTGCTTGG  
GGACGATCAGCTATATAATGTGATTGTAACAGCTCATGCTTTTGTTATGATTTTTTTTTT  
AGTTATGCCTATAATAATCGGGGGTTTTGGAATTGACTGGTACCGCTGATGTTGGGAGC  
TCCAGATATAGTATCCACGTTTAAATAATATGAGTTTTGGCTTTTACCTCCCGCACT  
TTTACTTCTTCTGTCATCGGCAGCTGTGGAAAGAGGGGTAGGAACAGGATGAAGTGTATA  
TCCACCTTTGGCTGGAAATTTGGCACATGCTGGCGGATCTGTAGATCTAGCAATTTTCTC  
TTTACATCTTGCTGGAGTTTCTTCTATTTTGGGAGCTGTAAATTTTATTACTACGATTAT  
TAACATACGATGACAAGGAATGAAATTTGAACGTCTTTCATTATTTGTATGATCTGTAAA  
AATCACAGCTATTTTACTTCTTTTATCTTTACCCGTGCTGGCTGGGGCTATTACTATGCT

TCGACTGATCGAAATTTTAATACTGCTTTTTTTGATCCTGCAGGAGGTGGGGATCCTAT  
TTTATATCAGCATTTATTT

>bengalensis

AACCAAGAAATTTAGTCATTCTTTTATGGTAAAAAGACAGTTAGGCAGA-AAGGACCCTT  
AGACCCTTAGTACAGGAGTAAATCTAAATACTAAGAGTTATACCTGACATGGTTT-ATT  
AGTGCTGAATCTGTGATAGCTTTAAGGGAACTGGGATTGGATACCCCATTTTATTTAGT  
TGTAATTTAGTT--AAGACTTACCGGAGTACTGCGAATGTTTAAAACTCAAAGGGCTTG  
GCGGTGTTTTAGACCTCTCAGGGGAACCTGTCTCATAATCGACAATCCACGTTAAACCTA  
ACCTTTTATAGCGATACAGTTTGTATACCGTCGTCGTCAGGTAACCTCTTAAATATAGT  
AGTTAGCCCGAGAATC--AA-GTTAATTAACCGTCAGATCAAGGTGCAGCCAATAAAAA  
GGTGAGGATGGGTACAATTACACATTTGTAAATACGGTACT-TGAAACAAAGTATCTTA  
AAGGAGGACTTGAAAGTAATTCTAATTATATAAATAGGATGAATAAGGCTCTGAAACGTG  
CAGAATTTTAAATGGTCGAACAGACCAACCCTTAAAGACTTCTGCATCTTTAGGACATTCT  
GGTCCAACATCGAGGTCACAAACCTTTTTTTCGATATGGGCTCTTGAAAAAGATAATGCT  
GTTATCCCTACGGTAACTAATTCCTTTGATCAAAAGCTT-TGGATCAAC-GCAAGCAAGA  
TTTA-AAAGGAGGCTTTGCTTACTCCTCGGTTGCCCCAACCAAAGT--GTTAATAGTTT  
T-CTTTTA-TTTAATTA--GTAACTCTATTAATTTCTCTAAAGCTCGATAGGGTCTTC  
TTGTCTTTTAATTATATCTGGACTTTTTCATCCAGAAATAAAATTCTAAGCAATCTAAAA  
GAGACAGGTGTATTCTTGTCAAACCATTCATTCCAGCCTTCAATTATAAGGCAAATGATT  
ATGCTACCTTTCACGGTCAGAGTACCGCGGCCGTT-TAAAA-CACTGGGCAGGTCCGAC  
TTCGTATTTAAC-ACTGACACGACATTGTATATTTTGTGGTATATGATCTGGATTAGT  
TGGAACGGCCCTAAGGCTATTGATTCGTGCAGAGTTAGGACAACCGGGTGCCTTGCTTGG  
GGATGATCAGCTATATAATGTGATTGTAACAGCCCATGCTTTTGTTATGATTTTTTTTT  
AGTTATGCCTATAATAATCGGGCGTTTTGGAAATTGATTGGTACCGCTGATGTTGGGAGC  
TCCAGATATAGTATCCACGTTTAAATAATATGAGTTTTGGCTTTTACCTCCCGCACT  
TTTACTTCTTCTATCATCGGCAGCTGTGGAAAGAGGGGTAGGAACAGGATGAACTGTATA  
TCCACCTTTGGCTGGAAATTTGGCACATGCTGGCGGATCTGTAGATCTGGCAATTTTTTC  
TTTACATCCTGCTGGTGTTTCTTCTATTTTAGGAGCTGTAAATTTTATTACTACAATTAT  
TAACATACGATGACAAGGAATGAAATTTGAACGCCTTTCATTATTTGTGTGATCTGTAA  
AATTACAGCTATTTTACTTCTTTTATCTTTACCAGTGCTGGCTGGGGCTATTACTATGCT  
TCTAACCGATCGAAATTTTAATACTGCTTTTTTTGACCCTGCAGGAGGTGGGGATCCTAT  
TTTATATCAGCATTTATTT

>victoriae

AACCAAGAAATTTAGTCATTCTTTTATGGTAAAAAGACAGTTAAGCAGA-GAGGATCATT  
AGACCCTTAGTACAGGAGTAAATCTAAATACTGAGAGTTATACCTGGTATGATTT-ATT  
AGTGCTGAATCTGTGATAGCTTTAAGGGAACTGGGATTGGATACCCCATTTTATTTAGT  
TGTAATTTAGTT--AAGGCTTACCGGAGTACTACGAATGTTTAAAACTCAAAGGGCTTG  
GCGGTGTTTTAGACCTCTCAGGGGAACCTGTCTCATAATCGACAATCCACGTTAAACCTA  
ACCTTTTATAGCGATACAGCTTGTATACCGTCGTCGTCAGGTAACCTCTTAAATATAGT  
AGTTAGCCCGAGAATT--AA-GTTAATTAACCGTCAGATCAAGGTGCAGCTAATAAAAA  
GGTGAGGATGGGTACAATTATATTTATAAATACGGTACT-TGAAATAAAGTATCTTA  
AAGGAGGACTTGAAAGTAATTCTAATTATATAAATAGGATGAATAGGGCTCTGAAACGTG  
CNNNATTTTAAATGGTCGAACAGACCAACCCTTAAAGACTTCTGCATCTTTAGGACATTCT  
GGTCCAACATCGAGGTCACAAACCTTTTTTTCGATATGAGCTCTTGAAAAAGATAATGCT  
GTTATCCCTACGGTAACTAATTCCTTTAATCAAAATATT-TGGATCAAC-ACAAGCAAGA  
TTTA-AAAGGAGGCTTTACTTACTCCTCGGTTGCCCCAACCAAAGT--GTTAATAGTTT  
T-CTTTTA-CCTAATTA--GTAACTCTATTAATTTCTCTAAAGCTCGATAGGGTCTTC  
TTGTCTTTTAATCATATCTGGACTTTTTCATCCAAAAATAAAATTCTAAGCAATCTAAAA



GAGACAGCTGCATTCTTGTCAAACCATTCAATCCAGCCTTCAATTATAAGGCAAATGATT  
ATGCTACCTTTGCACGGTCAGAGTACCGCGGCCGTT-TAAAA-CACTGGGCAGGTCCGAC  
TTCGTATNNNNN-NNNNNNNNNNNNNNNNNNNNATTTTGTGGTATATGATCTGGATTAGT  
TGGAACGGCCCTAAGGYTATTGATTCGTGCAGAGTTAGGACAACCAGGTGCCTTGCTTGG  
GGACGATCAGCTATATAATGTRATTGTAACAGCCCATGCTTTTGTATGATTTTTTCTT  
AGTTATGCCTATAATAATTGGGGGTTTTGGAACTGGCTGGTACCCCTCATGTTGGGAGC  
TCCAGATATAGTATTCCCACGTTTAAATAATATAAGTTTTTGGCTTTTACCTCCAGCACT  
TTTACTTCTTCTATCGTCGGCAGCTGTGGAAAGGGGGGTGGGAACAGGATGAACTGTATA  
TCCGCTTTGGCTGGAAATTTAGCACATGCTGGTGGATCTGTAGATCTGGCAATTTTTTC  
TTTACATCTTGCTGGGGCTTCTTCTATTTTGGGAGCTGTAAATTTTATTACTACGATTAT  
TAACATACGATGACAAGGAATGAAATTTGAACGCTTTTCATTGTTTGTATGATCTGTAAA  
AATTACGGCTATTTTGCTTCTTTTATCTTTACCTGTGCTGGCTGGGGCCATTACTATGCT  
TCTAACTGATCGAAATTTTAATACTGCTTCTTTGATCCTGCAGGAGGCGGGGATCCTAT  
TTTATATCAGCATTATTT

>aureus

AACCAAGAAATTTAGTCATTCTTTACGGTAAAAAGACAGTTAAGCAGA-AAGGATCATT  
AGACCCCTTAATATAGGAGTAAATCCAAATATTAAGAGTTATATCAGATGTGGTTT-ATT  
AATGCTGAGTCTGTGATAGCTTTAAGGGAACTGGGATTGGATACCCCATTTTATTTAGT  
TGTAACCTTAGTT--TAGGCTTACCGGAGTACTACGAATGTTTAAACTCAAAGGGCTTG  
GCGGTGTTTTAGACCTCTCAGGGGAACCTGTCTCATAATCGACAATCCGCGTTAAACCTG  
ACCTTTTATAGCAATACAGCCTGTATACCGTCGTCGCCAGGTAACCTTCTTAAATATAGT  
AGTTAGCCCGAGAATC--AA-GTTAATTAACGTCAGATCAAGGTGCAGCTAATAAAAA  
GGTGAGGATGGGTTACAATTATATTTGTAAATACGGCACT-TGAAACAAAGTGTCTTA  
AAGGAGGACTTGAAAGTAATTCTAATTATATAAATAGGATGAATAAGGCTCTGAAACGTG  
CAGAATTTAATGGTCGAACAGACCAACCCTTAAAGACTTCTGCATCTTTAGGACATTCT  
GGTCCAACATCGAGGTCACAAACCTTTTTTTCGATATGGGCTCTTGAAAAAGATAATGCT  
GTTATCCCTACGGTAACCTAATTCTTTGATCAAAAGCTT-TGGATCAAC-ACAAGTAAGA  
CTTA-AAAGGAGGCTTTATTTACTCCTCGGTTGCCCAACCAAAAT--ATTTAATAGTTT  
T-CTTTTA-CTTAATTA--ATAAATTCTATTAATTTCTCTAAAGCTCGATAGGGTCTTC  
TTGTCTTTTAATTATATCTGGACTTTTTCATCCAAAATAAAATTCTAAGTAATCTAAAA  
GAGACAGGTGTATTCTTGTCAAACCATTCAATCCAGCCTTCAATTATAAGGCAAATGATT  
ATGCTACCTTTGCACGGTCAGAGTACCGCGGCCGTT-TAAAA-CACTGGGCAGGTCCGAC  
TTCGTATTTAAT-ATTGACACGACATTGTATTTTTGTTTGGTATATGATCTGGATTAGT  
TGGAACAGCCCTAAGGTTACTGATTCGTGCGGAGTTAGGGCAACCAGGTGCCTTGCTTGG  
GGATGATCAGCTATATAATGTGATTGTAACGGCCCATGCTTTTGTATGATCTTTTTCTT  
AGTTATACCTATGATAATTGGGGGCTTTGGAACTGGCTAGTACCGTTGATGTTAGGGGC  
TCCGGATATAGTATTCCCGCGCTTAAATAACATGAGTTTTTGGCTTTTACCCCTGCACT  
TTTACTTCTTTATCATCGGCAGCTGTGGAAAGGGGGGTAGGAACAGGATGAACTGTATA  
TCCGCCCTTAGCTGGGAATTTAGCGCATGCTGGCGGATCTGTAGATCTAGCGATTTTTTC  
TTTGCATCTTGCTGGAGTTTCTTCTATTTTGGGAGCTGTAAATTTTATTACTACGATTAT  
TAATATACGATGACAAGGAATGAAATTTGAACGCTTTTCATTGTTTGTATGATCTGTAAA  
AATTACAGCTATTTTGTTACTTTTATCTTTACCTGTGTTGGCTGGGGCTATTACTATGCT  
TCTAACTGATCGGAATTTTAACACTGCTTCTTTGACCCTGCAGGAGGTGGAGATCCTAT  
TTTATATCAGCATTATTT

>legatus

AACCAAGAAATTTAGTCATTCTTTACGGTAAAAAGACGGTTAAGCAGA-GATGATCATT  
AGACCCCTAGTATAGGAGTAAATCTAAATACTAAGAGTTATACCAGCTGTGATTT-ATT  
AGTGCTGAATCTGTGATAGCTTTAAGGGAACTGGGATTGGATACCCCATTTTATTTAGT

TGTAAATTTAGTT--TAGACTTACCGGAGTACTACGAATGTTTAAAACCTCAAAGGGCTTG  
GCGGTGTTTTAGACCTCTCAGGGGAACCTGTCTCGTAATCGACAATCCACGTTAAACCTA  
ACCTTTTATAGCAGTACAGCCTGTATACCGTCGTCAGGTAACCTCTTAAAATATAGT  
AGTTAGCTCGAGAATC--AA-GTTAATTTAAACGTCAGATCAAGGTGCAGCTAATAAAAA  
GGTGAGGATGGGTTACAATTATATATTTGTAAGTACGGTACT-TGAAATGAAGTATCTTA  
AAGGAGGACTTGAAAGTAATTTTAATTATATAAATAGAATGAATAGGGCTCTGAAACGTG  
CAGAATTTTAATGGTGAACAGACCAACCCCTAAAGACTTCTGCATCTTTAGGATATTCT  
GGTCCAACATCGAGGTCACAAACCTTTTTTCGATATGGGCTCTTGAAAAAGATAATGCT  
GTTATCCCTACGGTAACTAATTCCTTTGATCAAAAACCTT-TGGATCAAC-ACAAGTAAGA  
TTTA-AAAGGAGGCTTTATTTACTCCTCGGTTGCCCCAACCAAAGT--ATTTAATAGTTT  
T-CTTTTAA-TTTGATTA--GTAAAGTCTATTAACCTTCTCTAAAGCTCGATAGGGTCTTC  
TTGTCTTTTAATCATATCTGGACTTTTTTCATCCAGAAATAAAATTCTAAGTAATCTAAAA  
GAGACAGGTGTATTCTTGTCAAACCATTCATTCCAGCCTTCAATTATAAGGCAAATGATT  
ATGCTACCTTTGCACGGTCAGAGTACCGCGGCCGTT-TAAAA-CACTGGGCAGGTCCGCAC  
TTCGATTTAAT-ATTGACACGACATTATATATTTTATTTGGTATATGGTCTGGCTTGGT  
TGGAACGGCCCTAAGTCTATTGATTCTGTCAGAAATTAGGACAACCGGTGCCTTACTTGG  
GGATGATCAACTATATAACGTGATTGTAACAGCCCATGCTTTTGTATGACTTTTTTCTT  
AGTAATACCTATGATAATTGGGGGTTTTGGAACTGGTTGGTGCCTTTAATGTTGGGGGC  
TCCAGATATGGTGTTTCTCGCTTAATAACATAAGTTTTTGGCTTTTGCCTCCTGCGCT  
TTTACTCCTTCTATCATCAGCAGCCGTAGAGAGGGGGGTAGGAACAGGATGAACTGTATA  
TCCACCTTTAGCTGGAAATCTAGCGCATGCCGGTGGATCTGTAGATTTGGCAATTTTTTC  
TTTACACCTTGCTGGGGTTTTCTTCTATTTTAGGGGCTGTAACTTTATTACCACGATTAT  
TAATATGCGATGACAAGGAATGAAATTTGAACGTCTTTCATTGTTTGTGTGATCTGTAAA  
AATTACAGCTATTTTGCTTCTTCTGTCTTTACCTGTATTGGCTGGAGCCATTACTATGCT  
TCTAACTGATCGAAATTTCAATACTGCCTTTTTTGATCCTGCAGGAGGTGGTGATCCTAT  
TTTATATCAACATTTATTT

>aulicus

AACCAAGAAATTTAGTCATTCTTTTACGGTAAAAAGACAGTTAGGCAAA-AATAATCATT  
AGACCTTTGGTATAGGAGTAAAATCTAAATACTAAAAGTTATATTAGTTGTGGTTT-ATT  
AGTGCTGAATCTGTGATAGCTTTAAGGGAACTGGGATTGGATACCCCGTTATTTTTAGT  
TGTAATTTAGTT--TAAGCTTACCAGAGTACTACCAATGTTTAAAACCTCAAAGGGCTTG  
GCGGTGTTTTAGACCTCTCAGGGGAACCTGTCTCGTAATCGACAATCCACGTTAAACCTA  
ACCTTTTATGGCGATACAGCCTGTATACCGTCGTCAGGTAACCTCTTAAAATATAGC  
AGTTAGCTCGAGAACT--TA-ATTAATTAGAACGTCAGATCAAGGTGCAGCTTATAAAGA  
GGTGAGGATGGGTTACAATTACATATTTGTAAATACGGTACT-TGAAACATAGTATCATA  
AAGGAGGACTTGAAAGTAATTCTAGTTATATAAATAGAATGAATATGGCTCTGAAACGTG  
CAGAATTTTAATGGTGAACAGACCAACCCCTCAAAGACTTCTGCATCTTTAGGACATTCT  
GGTCCAACATCGAGGTCACAAACCTTTTTTCGATATGGGCTCTTGAAAAAGATAATGCT  
GTTATCCCTACGGTAACTAATTCCTTTGATCAAAAATTT-TGGATCAAT-ACAAGCAAGA  
TTTA-AAAGGAGGCTTTACTTACTCCTTGGTTGCCCCAACCAAAGT--TTTTAATAGCTT  
T-TCTTTTA-ATTAATTG--ATAAACTCTATTAATTTCTTCTAAAGCTCGATAGGGTCTTC  
TTGTCTTTTAATCGTATCTGGACTTTTTTCATCCAAAAATAAAATTCTAGCTAATCTAAAA  
GAGACAGGTGTATTCTTGTCAAACCATTCATTCCAGCCTTCAATTATAAGGCAAATGATT  
ATGCTACCTTTGCACGGTCAGAGTACCGCGGCCGTT-TAAAA-CACTGGGCAGGTCCGCAC  
TTCGATTTAAT-ACCGACACGACACTGTATATTTTATTTGGTATATGATCTGGGTAGT  
TGGAACGGCTCTAAGATTATTGATTCTGTCAGAGTTAGGACAACCGGTGCTTTACTTGG  
TGATGATCAACTGTATAATGTAATTGTAACAGCCACGCTTTTGTATAATTTTTTTCTT  
AGTGATGCCTATAATAATCGGAGGATTTGGAAATTGGCTGGTGCCATTGATATTGGGGGC

TCCAGACATAGTATTTCCGCGTTTAAATAACATAAGTTTTGGCTTTTACCTCCTGCACT  
TTTACTTCTTTTATCATCGGCTGCAGTAGAAAGTGGTGTGGAACAGGATGGACTGTGTA  
TCCACCTTTAGCAGGAAATTTAGCACATGCCGGGGGGTCTGTAGATCTAGCAATTTTTTC  
TTTACACCTTGCTGGGGTTTCTTCTATTTTAGGAGCGGTAAATTTTATTACCACAATCAT  
TAATATGCGATGACAAGGAATAAAATTTGAGCGTCTTTCATTATTTGTATGATCTGTAAA  
AATTACAGCTATTCTACTTCTTCTATCTTTACCTGTCTTAGCTGGAGCTATTACTATGCT  
TTTGACTGATCGAAATTTTAATACTGCTTCTTTGATCCTGCAGGAGGCGGCGACCCTAT  
TTTATATCAGCATTTATTT

>episcopatus

AACCAAGAGATTTAGTCATTCTTTTATGGTAAAAAGACAGTTAAGCAGA-AAGGATCACC  
AGACCTTTAGTATAGGAGTAAAATCTAAATACTAAAAGTTATACCAGCTGTGGTTC-ATC  
TGTGCTGAATCTGTGATAACTTTAAGGGAACTGGGATTGGATACCCCATTTTCTAGT  
TGTAATTTAGCT--TAAGCTTACCAGAGTACTACGAATGTTTAAAACTCAAAGGGCTTG  
GCGGTGTTTTAGACCTCTCAGGGGAACCTGTCTCGTAATCGACAATCCACGTTAAACCTA  
ACCTCTTATAGCGACACAGCCTGTATACCGTCGTCGTCAGGTAACCTCTTAAAATGTAGT  
AGTTAGCTCGAGAATT--AG-ATTAATTAGAACGTCAGATCAAGGTGCAGCTTATAAAGA  
GGTGAGGATGGGTTACAATTACATATTTGTAAATACGGTACT-TGAAATATAGTATCATA  
AAGGAGGACTTGAAAGTAATTTTAGTTATATAAATAGAATGAATATGGCTCTGAAACGTG  
CAGAATTTAATGGTGAACAGACCAACCCTTAAAGACTTCTGCATCTTTAGGATATTCT  
GGTCCAACATCGAGGTCACAAACCTTTTTTTCGATATGGGCTCTTGAAAAAGATAATGCT  
GTTATCCCTACGGTAACATAATTCCTTTGATCAAAAAATT-TGGATCAAT-ACAAGTAAGA  
TTTA-AAAGGAGGCTTTATTTACTCCTTGGTTGCCCAACCAAAGT--GTTAATAGCTT  
T-TCTTTTA-TCAAATCA--AGAACTCTATTAATTCCTCTAAAGCTCGATAGGGTCTTC  
TTGTCTTTAATTATATCTGGACTTTTTCATCCAAAAATAAAATTCTAATCAATCTAAAA  
GAGACAGGTGTATTCTTGTCAAACCATTCATTCCAGCCTTCAATTATAAGGCAAATGATT  
ATGCTACCTTTGCACGGTCAGAGTACCGCGGCCGTT-TAAAA-CACTGGGCAGGTCCGAC  
TTCGTATTTAGT-AATGACACGACATTGTATATTTTATTTGGTATATGATCTGGATTGGT  
TGGAACAGCCCTAAGATTATTAATTCGTGCAGAGTTAGGGCAACCAGGTGCTTTGCTTGG  
AGACGATCAACTATATAATGTAATTGTAACAGCGCATGCTTTTGTATAATTTTTTCTT  
AGTGATGCCTATAATAATTGGAGGGTTTGGAACTGGCTGGTGCCATTGATATTAGGAGC  
TCCAGATATAGTATTTCCACGTTTAAATAACATAAGTTTTTGACTTTTACCTCCTGCACT  
CTTACTTCTTTTGTATCAGCTGCAGTAGAAAGTGGTGTGGAACAGGATGAACTGTATA  
TCCGCCTTTAGCAGGAAATTTAGCACATGCTGGCGGATCTGTAGATCTGGCAATTTTTTC  
TTTACATCTTGCTGGGGTTTCATCTATTTTAGGAGCGGTAAATTTTATTACCACAATCAT  
TAACATACGATGACAAGGAATAAAATTTGAACGTCTTTCATTATTTGTATGATCTGTGAA  
GATTACAGCTATTCTACTTCTTCTATCTTTACCTGTCTTAGCTGGGGCTATTACTATACT  
TTTAACTGATCGAAATTTTAATACTGCTTCTTTGACCCTGCAGGCGGCGGTGACCCTAT  
TTTGTACCAACATTTATTT

>crocatus

AACCAAGAGATTTAGTCATTCTTTTACGGTAAAAAGACAGTTAAGCAGA-AGAGATCATT  
AGACCTTTAGTATAGGAGTAAAATCTAAATACTAAAAGTTATATCGGTTGTGGTTC-ATT  
TGTGCTGAGTCTGTGATAGCTTTAAGGGAACTGGGATTGGATACCCCATTTTATTTAGT  
TGTAATTTAGTT--TAAGCTTACCGGAGTACTACGAATGTTTAAAACTCAAAGGGCTTG  
GCGGTGTTTTAGACCTCTCAGGGGAACCTGTCTCGTAATCGACAGTCCACGTTAAACCTA  
ACCTTTTATAGCAATACAGCTTGTATACCGTCGTCGTCAGGTAACCTCTTAAAATATAGT  
AGTTAGCTCGAGAATC--AA-ATTAATTAGGACGTCAGATCAAGGTGCAGCCAATAAAGA  
GGTGAGGATGGGTTACAATTACATACTTGTAAATACGGTATT-TGAAACATAGTATCATA  
AAGGAGGACTTGAAAGTAATTTTAGTTATATAAATAGAATGAATATGGCTCTGAAACGTG

CAGAATTTTAATGGTCGAACAGACCAACCCTTAAAGACTTCTGCATCTTTAGGATATTCT  
GGTCCAACATCGAGGTCACAAACCTTTTTTCGATATGGGCTCTTGAAAAAGATAATGCT  
GTTATCCCTACGGTAACTAATTCTTTGATCAAAAATTT-TGGATCAGC-ACAAGTAAGA  
TTCA-AAAGGAGGCTTTACTTACTCCTCGGTTGCCCCAACCAAAGT--ATTTAATAGTCT  
T-CCTTTTA-CCTAATTA--GTAAACCCTATTAATTTTCCTAAAGCTCGATAGGGTCTTC  
TTGTCTTTTAATTGCATCTGGGCTTTTTCACCCAAAAATAAAATTCTAATAAATCTAAAA  
GAGACGGGCTGTATTCTTGTCAAACCGTTCATTCCAGCCTTCAATTATAAGGCAAATGATT  
ATGCTACCTTTGCACGGTCAGAGTACCGCGGCCGTT-TAAAA-CACTGGGCAGGTCCGAC  
TTCATATTTAAT-ACTGACACGACGTTGTATTTTTATTTGGTATATGATCTGGTTTAGT  
CGGAACGGCTTTGAGATTGCTAATTCGTGCAGAACTAGGACAACCAGGTGCTTTACTTGG  
TGACGATCAACTATACAATGTAATTGTAACAGCTCATGCTTTTGCATAATTTTTTTCTT  
AGTGATGCCTATAATAATCGGAGGCTTTGGAAACTGATTAGTACCATTAAATGTTGGGGGC  
TCCAGATATAGTATTTCCGCGGTTAAATAACATAAGTTTTTGGCTTTTGCCGCTGCACT  
TTTACTTCTTTTGTGCTCAGCTGCAGTGGAGAGGGGGGTAGGAACAGGATGAACTGTATA  
TCCACCTTTGGCAGGAAATCTGGCGCATGCTGGTGGGCTGTGGATCTAGCGATTTTTTC  
TTTACATCTTGCTGGAGTTTCTTCTATTTTAGGAGCGGTGAACTTTATTACTACTATCAT  
TAATATGCGATGGCAAGGAATAAAGTTTGAGCGTCTTTCGTTGTTTGTGTGATCTGTGAA  
GATTACGGCTATTTTACTCCTTTTATCTTTGCCTGTCTTGGCTGGAGCCATTACTATGCT  
TTTAACTGATCGAAATTTTAACTGCTTTCTTTGATCCGGCGGGGGGTGGTGATCCTAT  
TTTGTACCAGCATTTATTT

>pennaceus

AACCAAGAAATTTAGTCATTCTTTTACGGTAAAAAGACAGTTAAGCAAA-AAGGATCATT  
AGACCTTTAGTATAGGAGTAAAATCTAAATACTAAAAGTTATATCAGTTATGGTTT-GTT  
TGTGCTGAATCTGTGATAGCTTTAAGGGAACTGGGATTGGATACCCATTATTTTAGT  
TGTAATTTAGTT--TAAGCTTACCAGAGTACTACGAATGTTTAAACTCAAAGGGCTTG  
GCGGTGTTTTAGACCTCTCAGGGGAACCTGTCTCGTAATCGACAGTCCGCGTTAAACCTA  
ACCTTTTATAGCAATACAGCTTGTATACCGTCGTCGTCAGGTAACCTTCTTAAATATAGT  
AGTTAGCTCGAGAATC--AA-GTTAATTAGGACGTCAGATCAAGGTGCAGCTAATAAAGA  
GGTGAGGATGGGTTACAATTACATACTTGTAATACGGTATT-TGAAATATAGTATCATA  
AAGGAGGACTTGAAAGTAATTTTAGTTATATAAATAGGATGAATATGGCTCTGAAACGTG  
CAGAATTTTAATGGTCGAACAGACCAACCCTTAAAGACTTCTGCATCTTTAGGATATTCT  
GGTCCAACATCGAGGTCACAAACCTTTTTTCGATATGGGCTCTTGAAAAAGATAATGCT  
GTTATCCCTACGGTAACTAATTCTTTGATCAAAAATTT-TGGATCAAT-ACAAGTAAGA  
TCTA-AAAGGAGGCTTTGCTTACTCCTCGGTTGCCCCAACCAAAGT--GTTAATAGTCT  
T-CCTTTTA-CTTAATCA--GTAAACTCTATTAATTTTCCTAAAGCTCGATAGGGTCTTC  
TTGTCTTTTAATCATATCTGGGCTTTTTCACCCAAAAATAAAATTCTAATAAATCTAAAA  
GAGACAGGTGTATTCTTGTCAAACCGTTCATTCCAGCCTTCAATTATAAGGCAAATGATT  
ATGCTACCTTTGCACGGTCAGAGTACCGCGGCCGTT-TAAAA-CACTGGGCAGGTCCGAC  
TTCGATTTAAT-ACTGACACNACATTATATTTTTATTTGGTATATGGTCTGGCTTAGT  
TGGAACGGCTTTAAGATTGTTGATTTCGTGCAGAGCTAGGACAACCAGGTGCTTTACTTGG  
TGATGATCAATTATATAATGTAATTGTAACAGCTCATGCTTTTGCATAATTTTTTTCTT  
AGTAATACCTATAATAATCGGGGGCTTTGGAAACTGATTAGTACCGTTAATGCTAGGGGC  
TCCAGATATAGTATTTCCACGCTTAAATAACATAAGTTTTTGGCTTTTACCGCCCGCACT  
TTTACTTCTTTTGTGCTCAGCTGCGGTGGAAAGAGGGGGTAGGAACAGGATGAACTGTATA  
TCCACCTTTAGCAGGAAACTTGGCGCATGCCGGTGGATCTGTAGATCTAGCAATTTTTTC  
TTTACATCTTGCTGGGGTTTCTTCTATTTTAGGAGCGGTAACTTTATTACTACCATTAT  
TAATATACGATGGCAAGGAATAAATTTGAGCGTCTTTCGTTGTTTGTGTGGTCTGTAAA  
AATTACAGCTATTTTACTTCTTTTATCTTTACCTGTCTTGGCCGGAGCTATTACTATGCT

TTTAACTGATCGAAATTTTAATACCGCTTTCTTTGATCCTGCAGGAGGTGGTGATCCTAT  
TTGTACCAACATTTATTT

>textile

AACCAAGAAATTTAGTCATTCTTTTACGGTAAAAAGACAGTTAGGCAAA-AAGGATTATT  
GGACCTTTAGTATAGGAGTAAAATCTAAATACTAATAGTTATATCAAGCATAATTT-GTT  
-GTGCTGAGTCTGTGATAGCTTTAAGGGAACTGGGATTGGATACCCCATTTTATTTAGT  
TGTAATTTAGTT--TAGACTTACCGGAGTACTACGAATGTTTAAAACCTCAAAGGGCTTG  
GCGGTGTTTTAGACCTCTCAGGGGAACCTGTCTCGTAATCGACAATCCGCGTTAAACCTA  
ACCTTTTATAGCAATACAGCCTGTATACCGTCGTCAGGTAACCTCTTAAAAATATAGT  
AGTTAGCCCGAGAATC--AG-ATTAATTAACCGTCAGATCAAGGTGCAGCTAATAAAAA  
GGTGAGGATGGGTACAATTACATATTTGTAATTACGGTACT-TGAAATGAGGTATTTTA  
AAGGAGGACTTGAAAGTAATTTTAATAATATAAATAGAATGAATAGGGCTCTGAAACGTG  
CAGAATTTTAATGGTCGAACAGACCAACCCTTAAAGACTTCTGCATCTTTAGGACATTCT  
GGTCCAACATCGAGGTCACAAACCTTTTTTTCGATATGGGCTCTTAAAAAAGATAATGCT  
GTTATCCCTACGGTAACTAATTCCTTTGATCAAAAAATT-TGGATCACC-ACATGCAGGA  
TTCA-AAAGGAGGCTTTACTTGCTCCTCGGTTGCCCCAACCAAAGT--ATTTAATAGTTT  
T-CCTTTTA-TCTAATTG--GTAAAGTCTATTAACCTCCCTAAAGCTCGATAGGGTCTTC  
TTGTCTTTTAATTATATCTGGACTTTTTCATCCAAAGATAAAATTCTAAGTAATCTAAAA  
GAGACAGCTGTATTCTTGTCAAACCATTCATTCCAGCCTTCAATTATAAGGCAAATGATT  
ATGCTACCTTTCACGGTCAGAGTACCGCGGCCGT-TAAAA-CACTGGGCAGGTCCGAC  
TTCGTATTTAAT-ACTTACACGACATTGTATATTTTATTTGGTATATGGTCTGGGTTGGT  
CGGAACCGCTCTAAGGTTGTTGATTCTGTCAGAGTTAGGACAACCAGGTGCTTTGCTTGG  
AGATGATCAGCTATACAATGTGATTGTAACAGCTCATGCTTTTGTATAATTTTTTCTT  
GGTAATGCCTATAATAATTGGAGGTTTTGGAACTGGTTGGTACCCTTAATATTAGGAGC  
TCCGGATATAGTATTTCCACGTTTAAATAACATGAGTTTTTGGCTTTTGCCGCTGCACT  
TTTACTTCTTTTATCATCAGCAGCTGTAGAAAGAGGAGTGGGGACAGGATGGACTGTATA  
TCCACCTTTAGCAGGAAATTTAGCGCATGCCGGCGGATCTGTAGATCTAGCGATTTTTTC  
TTTGATCTTGCTGGGGTTTCTTCTATTTTAGGAGCTGTAAATTTTATTACTACGATTAT  
TAATATACGATGACAAGGAATAAAATTTGAGCGCTTTCCTGTTTGTATGATCTGTAA  
AATTACAGCTATTTTGCTTCTTTTATCTCTGCCTGTGTTAGCTGGGGCTATTACTATACT  
TTTGACTGATCGAAATTTTAATACTGCATTCTTTGATCCAGCAGGAGGTGGGGATCCTAT  
TTTATACCAGCATTTATTT

>dalli

AACCAAGAAATTTAGTCATTCTTTTACGGTAAAAAGATAGTTAAGCAAA-AAGGATTATA  
AGATCTTTAGTATAGGAGTAAAATCTAGATACTAATAGTTATACCGAGCATAATTT-GTT  
-GTGCTGAGTCTGTGATAGCTTTAAGGGAACTGGGATTGGATACCCCATTTTATTTAGT  
TGTAATTTAGTT--TAGGCTTACCAGAGTACTACGAATGTTTAAAACCTCAAAGGGCTTG  
GCGGTGTTTTAGACCTCTCAGGGGAACCTGTCTCGTAATCGACAATCCGCGTTAAACCTA  
ACCTTTTATAGCAATACAGCCTGTATACCGTTGTCGTCAGGTAACCTCTTAAAAATATAGT  
AGTTAGCTCGAGAATT--AG-ATTAATTAACCGTCAGATCAAGGTGCAGCTAATAAAAA  
GGTGAGGATGGGTACAGTTACATATTTGTAATTACGGTGCT-TGAAATGAAGTATTTTA  
AAGGAGGACTTGAAAGTAATTTTAATAATATAAGTAGGATGAATAGGGCTCTGAAACGTG  
CAGAATTTTAATGGTCGAACAGACCAACCCTTAAAGACTTCTGCATCTTTAGGATATTCT  
GGTCCAACATCGAGGTCACAAACCTTTTTTTCGATATGGGCTCTTAAAAAAGATAATGCT  
GTTATCCCTACGGTAACTAATTCCTTTGATCAAAAAATT-TGGATCAAT-ACAAGCAAGA  
TTTA-AAAGGAGGCTTTACTTACTCCTCGGTTGCCCCAACCAAAGT--ATTTAATAGTTT  
T-CCTTTTA-TCTTATTG--GTAAATCTATTAACCTCTCTAAAGCTCGATAGGGTCTTC  
TTGTCTTTTAATCATATCTGGACTTTTTCATCCAAAGATAAAATTCTAAGTAATCTAAAA

GAGACAGGTGTATTCTTGTCAAACCATTCATTCCAGCCTTCAATTATAAGGCAAATGATT  
ATGCTACCTTTGCACGGTCAGAGTACCGCGGCCGT-TAAAA-CACTGGGCAGGTCCGAC  
TTCGTATTTAAT-ACCTACACGACATTGTATTTTTATTTGGTATATGATCTGGGCTGGT  
TGGAAGTGCCTAAGATTATTAATTCGTGCAGAGCTAGGGCAACCAGGTGCTTTGCTAGG  
GGATGACCAACTATATAATGTGATCGTAACAGCCCATGCTTTTGTTATGATTTTTTCTT  
AGTAATGCCTATGATAATTGGAGGATTTGGGAACTGGTGGTACCCTTAATATTAGGAGC  
TCCAGATATAGTGTTTTCCACGTTTAAATAATATGAGTTTTTGGCTTTTGCCGCCTGCGCT  
TTTACTTCTTTTATCATCAGCAGCTGTTGAAAGAGGAGTAGGGACAGGATGAACTGTATA  
TCCACCCTTAGCAGGAAATTTGGCGCATGCCGGCGGGTCTGTAGATCTAGCAATTTTTTC  
TTTACATCTTGCTGGTGTCTTCTATTTTAGGGGCTGTAACTTTATTACTACGATTAT  
TAATATACGATGACAAGGAATAAAATTTGAGCGTCTTCGCTGTTTGTGTGATCTGTAAA  
AATTACGGCTATTTTGCTTCTTTATCTCTGCCTGTATTGGCTGGAGCCATTACTATGCT  
TTTAACTGATCGAACTTTAATACTGCCTTCTTGATCCTGCAGGAGGTGGGGATCCTAT  
TTTATATCAGCATCTATT

>canonicus

NNNNNNNNNNNNNNNNNNNNNNNNNTACGGT-AAAAGATAGTTAAGCAAA-AAGGATTATA  
AGATCTTTAGTATAGGAGTAAAATCTAGATACTAATAGTTATACCGAGCATAATTT-GTT  
-GTGCTGAGTCTGTGATAGCTTTAAGGGAACTGGGATTGGATACCCATTATTTTTAGT  
TGTAATTTAGTT--TAGGCTTACCAGAGTACTACGAATGTTTAAACTCAAAGGGCTTG  
GCGGTGTTTTAGACCTCTCAGGGGAACCTGTCTCGTAATCGACAATCCGCGTTAAACCTA  
ACCTTTTATAGCAATACAGCCTGTATACCGTCGTCGTCAGGTAACCTCTTAAAATATAGT  
AGTTAGCTCGAGAATT--AG-ATTAATTAACGTCAGATCAAGGTGCAGCTAATAAAAA  
GGTGAGGATGGGTACAATTACATATTTGTAATTACGGCGCT-TGAAATGAAGCATCTTA  
AAGGAGGACTTGAAAGTAATTTAATAATATAAGTAAGATGAATAGGGCTCTGAAACGTG  
NNNNATTTAATGGTCAACAGACCAACCCTTAAAGACTTCTGCATCTTAGGATATCT  
GGTCCAACATCGAGGTCACAAACCTTTTTTCGATATGGGCTCTTAAAAAAGATAATGCT  
GTTATCCCTACGGTAACTAATTCCTTTGATCAAAAATTT-TGGATCAAT-ACAAGCAAGA  
TCTA-AAAGGAGGCTTTACTTACTCTCGGTTGCCCCAACCAAAGT--ATTTAATAGTTT  
T-CCTTTTA-TCTATTG--GTAAATCTATTAACCTCTCTAAAGCTCGATAGGGTCTTC  
TTGTCTTTTAATCATATCTGGACTTTTTTATCCAAAGATAAAATTTCTAAGTAATCTAAAA  
GAGACAGGTGTATTCTTGTCAAACCATTCATTCCAGCCTTCAATTATAAGGCAAATGATT  
ATGCTACCTTTGCACGGTCAGAGTACCGCGGCCGT-TAAAA-CACTGGGCAGGTCCGAC  
TTCGTATNNNNN-NNNNNNNNNNNATTGTATTTTTATTTGGTATATGATCTGGGCTGGT  
TGGAAGTGCCTAAGATTGTTAATTCGTGCAGAGCTGGGGCAACCAGGTGCTTTGCTAGG  
GGATGACCAACTATATAATGTGATCGTAACAGCCCATGCTTTTGTTATGATTTTTTCTT  
AGTAATGCCTATGATAATTGGAGGATTTGGGAACTGGTGGTACCCTTAATATTAGGAGC  
TCCAGATATAGTGTTTTCCACGTTTAAATAATATGAGTTTTTGGCTTTTGCCGCCTGCGCT  
TTTACTTCTTTTATCATCAGCAGCTGTTGAAAGAGGAGTAGGGACGGGATGAACTGTATA  
TCCACCCTTAGCAGGAAATTTGGCGCATGCCGGCGGGTCTGTAGATCTAGCAATTTTTTC  
TTTACATCTTGCTGGTGTCTTCTATTTTAGGGGCTGTAACTTTATTACTACGATTAT  
TAATATACGATGACAAGGAATAAAGTTTGAGCGTCTTCGCTGTTTGTGTGATCTGTAAA  
AATTACGGCTATTTTGCTTCTTTATCTCTGCCTGTATTGGCTGGAGCCATTACTATGCT  
TTTAACTGATCGAACTTTAATACTGCCTTCTTGACCCTGCAGGAGGTGGGGATCCTAT  
TTTATATCAACATCTATT

>ammiralis

AACCAAGAAATTTAGTCATTCTTTTATGGTAAAAAGACAGTTAGGCAAG-AAGGACTATA  
GGACCTATAGTATAGGAGTAAATCTAGATACTAATAGTTATACCGGTTGTGGTTT-ATT  
-GTGCTGAGTCTGTGATAGCTTTAAGGGAACTGGGATTGGATACCCCATTTTTTAGT

TGTAAATTTAGTT--TAGGCTTACCAGAGTACTACGAATGTTTAAAACCTCAAAGGGCTTG  
GCGGTGTTTTAGACCTCTCAGGGGAACCTGTCTCGTAATCGACAATCCACGTTATACCTG  
ACCTTTTACAGCGATACAGCCTGTATACCGTCGTCGTCAGGTAACCTCTTAAAATATAGT  
AGTTAGCTCGAGAGTT--AG-ATTAGTTAAAACGTCAGATCAAGGTGCAGCTAATAAAAA  
GGTGAGGATGGGTTACAATTATATATTATAAAATACGGTACT-TGAAATGAAGTATCTTA  
AAGGAGGACTTGAAAGTAATTCTAATAATATAAAATAGGATGAATAGGGCTCTGAAACGTG  
CAGAATTTTAATGGTGAACAGACCAACCCTTAAAGACTTCTGCATCTTTAGGACATTCT  
GGTCCACCATCGAGGTCACAAACCTTTTTTTCGATATGGGCTCTTAAAAAAGATAATGCT  
GTTATCCCTACGGTAACATAATTCTTTGATCAAAAATTT-TGGATCAAC-ACAGGTAAGA  
TTTA-AAAGGAGGCTTTACTTACTCCTCGGTTGCCCCAACCAAAGT--ATTTAATAGCTT  
T-CCTTTTA-TCTAATTG--GTGAA-TCTATTAATTTCTCTAAAGCTCGATAGGGTCTTC  
TTGTCTTTTAATTATATCTGGACTTTTTCATCCAAAGATAAAAGTTCTAAGTAATCTAAAA  
GAGACAGCTGTATTCTTGTCAAACCATTCAATCCAGCCTTCAATTATAAGGCAAATGATT  
ATGCTACCTTTGCACGGTCAGAGTACCGCGGCCGTT-TAAAA-CACTGGGCAGGTCCGAC  
TTCGTATTTAAT-ATCTACACGACATTGTATATTTGTTTGGTATATGATCTGGGTGGT  
TGGAAGTGCCTTAAGGCTATTGATTCTGTCAGAGTTAGGGCAACCAGGTGCTTTGCTTGG  
GGATGATCAGCTATATAATGTAATTGTAACAGCCCATGCTTTTGTATAATTTTTTCTT  
AGTTATACCTATGATAATTGGGGTTTTGGAACTGGTTGGTACCACTAATATTAGGGGC  
TCCAGATATAGTATTTCCACGTTTAAATAATATAAGTTTTTGGCTTTTGCCACCTGCACT  
TTTACTTCTTTATCATCAGCAGCTGTAGAAAGAGGGGTAGGGACGGGATGAACTGTATA  
TCCACCTTTAGCGGGAAATTTGGCGCATGCCGGCGGATCTGTAGATCTAGCGATTTTCTC  
TTTACATCTTGCTGGGGTTTCTTCTATTTAGGGGCTGTAAATTTTATTACTACAATTAT  
TAATATACGATGACAAGGAATAAAATTTGAGCGTCTTCGTTGTTTGTATGGTCTGTAAA  
AATTACGGCTATTTGCTTCTTTATCTCTGCCTGTGTTAGCTGGAGCCATTACTATGCT  
TTTAACTGATCGAAATTTAATACTGCTTTTTTGACCCTGCAGGAGGTGGGGATCCTAT  
TTTATACCAGCATTTATTT

>omaria

AACCAAGAAATTTAGTCATTCTTTTATGGTAAAAAGACAGTTAAGCAAA-AAAGATCATT  
AGACCTTTAGTACAGGAGTAAATCTAAATACTAAAAGTTATACCGGTTATGGTTT-ATT  
TGTGCTGAGGCTGTGATAGCTTTAAGGGAAACTGGGATTGGATACCCCATTTTATTTAGT  
TGTAATCTAGTT--TAAGCTTACCAGAGTACTACGAATGTTTAAAACCTCAAAGGGCTTG  
GCGGTGTTTTAGACCTCTCAGGGGAACCTGTCTCGTAATCGACAATCCACGTTAGACCTA  
ACCTCTTATGGCAACACAGCCTGTATACCGTCGTCGTCAGGTAACCTCTTAAAATATAGT  
AGTTAGCTCGAGAATT--AA-ATTAATTAGAACGTCAGATCAAGGTGCAGCTAATGAAGA  
GGTGAGGATGGGTTACAATTACATATTTGTAAATACGGTACT-TGAAATATAGTATCATA  
AAGGAGGACTTGAAAGTAATCTTAGTTATATAAATAAGATGAATATGGCTCTGAAACGTG  
CAGAATTTTAATGGTGAACAGACCAACCCTTAAAGACTTCTGCATCTTTAGGATATTCT  
GGTCCAACATCGAGGTCACAAACCTTTTTTTCGATATGGGCTCTTAAAAAAGATAATGCT  
GTTATCCCTACGGTAACATAATTCTTTGATCAAAAAGTT-TGGATCAGC-ACAGGTAAGA  
CTTA-AAAGGAGGCTTTATTTGCTCCTCGGTTGCCCCAACCAAAGT--ATTTAATAGTCT  
T-CCTTTTA-CTTAATTG--ATAAACTCTATTAATTTTTCTAAAGCTCGATAGGGTCTTC  
TTGTCTTTTAATCATATCTGGACTTTTTCATCCAAAAATAAAATCTAGTCAATCTAAAA  
GAGACAGGTGTATTCTTGTCAAACCATTCAATCCAGCCTTCAATTATAAGGCAAATGATT  
ATGCTACCTTTGCACGGTCAGAGTACCGCGGCCGTT-TAAAA-CACTGGGCAGGTCCGAC  
TTCGTATTTAA--GCTGACACGACATTATATATTTATTTGGTATGTGGTCCGGGTAGT  
TGGGACAGCCCTAAGGTTGCTGATTCTGTCAGAGTTGGGACAACCGGGTGCTTTGCTTGG  
CGATGATCAGTTATATAATGTTATTGTAACAGCTCATGCTTTGTTATGATTTTTTTCTT  
GGTAATGCCAATGATAATTGGTGGCTTTGGGAACTGATTGGTACCTTTAATATTAGGAGC

TCCAGATATGGTGTCCACGATTAAATAATATAAGCTTTTGGCTTTTGCCACCTGCACT  
TCTACTTCTTTATCATCAGCTGCAGTGGAAAGTGGCGTGGGTACTGGATGGACTGTATA  
TCCACCTCTTGCAGGAAATCTAGCTCATGCTGGTGGTTCTGTAGATCTTGCAATTTTTTC  
TTTACATCTTGCTGGGGTATCTTCTATTTTAGGAGCTGTAACTTTATTACCACAATTAT  
TAATATACGGTGACAAGGAATGAAATTTGAGCGTCTTTCGTTATTTGTATGATCGGTGAA  
GATTACGGCTATTTTGCTTCTTTATCTTTACCTGTTTTGGCAGGGGCTATTACTATACT  
TTTGACTGATCGAAATTTTAATACTGCTTCTTTGATCCAGCAGGAGGTGGTGATCCTAT  
TTTGATACCAACATTTATTT

>furvus

AACCAAGAAATTTAGTCATTCTTTTTGGTAAAAAGACAGTTAGGTAGT-TAGAATTATA  
GGACCTTTAGTGCAGGAGTAAATCTAAATATTAAGTTATTTAGGTATAATTT-ATT  
TTTGCTGAATCTGTGATAGCTTTAAGGGAACTGGGATTGGATACCCATTATTTTAGT  
TGTAATATAGTT--TAACTTACCAGAGTACTACGAATGTTTAAACTCAAAGGGCTTG  
GCGGTGTTTTAGACCTTCAGGGGAACCTGTCTCGTAATCGACAATCCACGTTAAACCTA  
ATCTCTGTAGCAATACAGCTTGTATACCGTCGTCAGGTAACCTCTTAAATATAGT  
AGTTAGCTTGATAATC--AG-ATTAGTTAAACGTCAGATCAAGGTGCAGCTAATAAAGA  
GGTGAGGATGGGTACAATTATATTTGTAAATACGGTACT-TGAAATAAGGTATTTTA  
AAGGAGGACTTGAAAGTAATTTTAGTTATATAAATAAGATGAATAAGGCTCTGAAACGTG  
CAGAATTTAATGGTCGAACAGACCAACCCTTAAGACTTCTGCATCTTTAGGACATTCT  
GGTCCAACATCGAGGTCACAAACCTTTTTTCGATATGGGCTCTTAAAAAGATAATGCT  
GTTATCCCTACGGTAACATAATTTCTTTAATCAAAAACCTT-TGGATCAAT-ACAAGTAAGA  
CTCA-AAAGGAGGCTTTACCTACTCCTCGGTTGCCCAACCAAAT--ATTTAATAGCTT  
T-TCTTTTA-CTCAATTA--A-AAAATCTATCAACTTCTTTAAAGCTCGATAGGGTCTTC  
TTGTCTTTAATCATATCTGAACTTTTTCATCCAAAAATAAAATTCTAAGCAATCTAAAA  
GAGACAGGTGTATTCTTGTCAAACCATTCATTCCAGCCTTCAATTATAAGGCAAATGATT  
ATGCTACCTTTGCACGGTCAGAGTACCGCGGCCGTT-TAAAA-CACTGGGCAGGTCCGAC  
TTTGTATTTAAA-ATTGACACGACATTGTATTTTTATTTGGTATGTGATCTGGACTAGT  
TGGAACGGCTCTTAGATTATTAATTCGTGCAGAGTTAGGGCAACCAGGTGCTTTGCTTGG  
AGATGATCAGCTATATAATGTAATTGTAACAGCTCATGCCTTTGTTATGATTTTTTTTTT  
AGTAATACCTATAATAATTGGAGGTTTCGGGAACCTGGTAGTACCTTTAATATTAGGAGC  
ACCGGATATGGTATTTCCGCGCTTAAATAATATAAGTTTTTGGCTTTTACCTCCTGCGCT  
TTTACTTCTCTTATCGTCGGCTGCTGTAGAAAGTGGAGTAGGAACAGGATGAACTGTATA  
TCCTCCTCTGGCGGGGAATTTAGCACATGCTGGTGGATCTGTAGATCTAGCAATTTTTTC  
TTTGATCTTGCAGGAGCTTCTTCTATCTTAGGAGCAGTAAATTTTATTACTACGATTAT  
CAATATACGATGACAAGGAATAAAGTTTGAGCGTCTTTCATTGTTTGTATGATCTGTAAA  
AATTACAGCTATTTTGCTTCTTATCTTTGCCTGTATTGGCTGGGGCAATTACTATACT  
TTTAACTGATCGAAATTTTAATACTGCTTCTTTGATCCTGCAGGAGGTGGTGATCCTAT  
TTTATATCAGCATTTGTTT

>araneosus

AACCAAGAAATTTAGTCATTCTTTTACGGTAAAAAGACAGTTAAGCAAA-ATTAGCCATT  
AGATCCTTAGTATAGGAGTAAATCTAGATACTAAAAGTTATATCGAAAATGGTTT-GTT  
TGTGTTGAATCTGTGATAGCTTTAAGGGAACTGGGATTGGATACCCATTATTTTAGC  
TGTAATTTAGTT--TAAGCTTACCGGAGTACTACGAATGTTTAAACTCAAAGGGCTTG  
GCGGTGTTTTAGACCTCTCAGGGGAACCTGTCTCATAATCGATAATCCACGTTAGACCTA  
ACCTTTTGTAGCATGTCAGCTTGTATACCGTCGTCAGGTAACCTCTTAAATACAGT  
AGTTAGCTCGATAATT--TA-GTTAATTAACACGTCAGATCAAGGTGCAGCTAATAAAGA  
GGCGAGGATGGGTACAATTACATATTTGTAAATACGACACT-TGAAATAAATGTTTCA  
AAGGAGGACTTGAAAGTAATTTTAGTTATATAAATAGAATGAATCTGGCTCTGAAACGTG



CAGAATTTTAATGGTCGAACAGACCAACCCTTAAAGACTTCTGCATCTTTAGGACATTCT  
GGTCCAACATCGAGGTCACAAACCTTTTTTCGATATGGGCTCTCAAAAAAGATAATGCT  
GTTATCCCTACGGTAACATAATTCTTTGATCAAAAATTT-TGGATCAAC-ATAAGTAAGA  
TTTG-AGAGGAGGCTTTATTTACTCCTCGGTTGCCCCAACCAAAGT--ATTTAATAGCCT  
T-TCTTTTA-TTTAATAG--ATAGAGTCTACTAATTTTTCTAAAGCTCGATAGGGTCTTC  
TTGTCTTTTAATCGTATCTGGACTTTTTCATCCAAAAATAAAATTCTAAGCAATCTAAAA  
GAGACAGGTGTATTCTTGTCAAACCATTCATTCCAGCCTTCAATTATAAGGCAAATGATT  
ATGCTACCTTTGCACGGTCAGAGTACCGCGGCCGTT-TAAAA-CACTGGGCAGGTCCGAC  
TTCGTATTTAAT-ATTAACACGACATTGTATATTTATTTGGAATGTGATCTGGCTTAGT  
TGGGACCGCCCTTAGGTTGTAAATTCGTGCAGAATTAGGACAACCGGGTGCCTTGCTTGG  
AGATGATCAGCTGTATAATGTAATTGTGACAGCTCATGCTTTTGTATGATTTTTTTCTT  
AGTAATACCCATAATAATCGGGGGCTTTGGAAATTGATTAGTGCCTTTGATGTTAGGAGC  
TCCAGATATAGTATTTCCACGTTTAAATAATATGAGTTTTTGGTTATTACCTCCTGCACT  
TTTACTTCTTTATCGTCGGCTGCAGTGGAGAGTGGAGTAGGTACAGGATGGACTGTATA  
TCCGCCATTAGCTGGGAATTTAGCGCATGCTGGTGGGTGAGTAGATCTAGCAATTTTTTC  
TTTACATCTTGCTGGTGTCTCTTCTATTTTAGGGGCGAGTAAATTTTATTACTACGATCAT  
TAATATACGATGACAGGGAATAAAATTTGAGCGTCTTTCGTTGTTTGTATGGTCTGTAAA  
AATTACAGCAATTTTGCTTCTTGTCTCTACCAGTATTGGCTGGAGCTATTACTATGCT  
TTTAACTGATCGAAATTTTAACACTGCTTTTTTTGATCCAGCAGGAGGCGGTGATCCTAT  
CTTATATCAGCATTTATTT

>bandanus

AACCAAGAAATTTAGTCATTCTTTTATGGTAAAAAGACAGTTAAACAAA-ATTAGTCATT  
GGATCCTTAGTATAGGAGTAAAATCTAAATACTAAGAGTTATACCGAAGATGGTTT-GTT  
TGTGTTGAATCTGTGATAGCTTTAAGGGAACTGGGATTGGATACCCATTATTTTAGT  
TGTAATTTAGTT--TGAGCTTACCGGAGTACTACGAATGTTTAAACTCAAAGGGCTTG  
GCGGTGTTTTAGACCTCTTAGGGGAACCTGTCTCATAATCGATAATCCACGTTAAACCTA  
ACCTTTTATAGCAAAACAGCCTGTATACCGTCGTCGTCAGGTAACCTTCTAAAATATAGT  
AGTTAGCTTGACAATT--TA-GTTAATTAAGACGTCAGATCAAGGTGCAGCCAATAAAAA  
GGTGAGGATGGGTTACAATTACACATTTGTAAATACGGCACT-TGAAATAAAGTGTCTG  
AAGGAGGACTTGAAAGTAATTTTAGTTATATAGGTAAATGAATCTGGCTCTGAAGCGTG  
CAGAATTTTAATGGTCGAACAGACCAACCCTTAAAGACTTCTGCATCTTTAGGACATTCT  
GGTCCAACATCGAGGTCACAAACCTTTTTTCGATATGAGCTCTCAAAAAAGATAATGCT  
GTTATCCCTACGGTAACATAATTCTTTGATCAAAAATTT-TGGATCAAC-ACAAGCAAGA  
TTTA-AAAGGAGGCTTTATTTACTCCTCGGTTGCCCCAACCAAAGT--GTTAATAGCTT  
T-TCTTTTA-CTTAATAG--ATAAAATCTACTAATCTTCTAAAGCTCGATAGGGTCTTC  
TTGTCTTTTAATTATATCTAGACTTTTTCATCCAGAGATAAAATTCTAAGCAATCTAAAA  
GAGACAGGTGTATTCTTGTCAAACCATTCATTCCAGCCTTCAATTATAAGGCAAATGATT  
ATGCTACCTTTGCACGGTCAGAGTACCGCGGCCGTT-TAAAA-CACTGGGCAGGTCCGAC  
TTCGTATCTAAT-ACTAACATGACATTATATATTTTATTTGGAATGTGATCTGGTTTGGT  
TGGAATGCTCTCAGGTTGTAAATTCGTGCAGAGTTAGGACAACCAGGTGCTTTGCTTGG  
GGACGATCAACTATATAATGTAATTGTAACAGCTCATGCTTTTGTATAATTTTTTTCTT  
AGTGATGCCTATAATGATTGGGGGTTTTGGGAATTGATTAGTACCATTAAATATTAGGGGC  
TCCGGATATGGTATTTCCACGTTTAAATAATATAAGTTTTTGATTATTGCCTCCTGCACT  
TTTGCTTCTTTTGTCTGCTGCGGTAGAAAGTGGAGTGGGTACGGGGTGAAGTGTGTA  
TCCGCCATTAGCTGGAAATCTAGCACATGCTGGTGGGTGAGTAGACCTAGCAATTTTTTC  
TTTACATCTTGCTGGTGTCTTCTATTTTAGGGGCGAGTAACTTTTATTACTACAATTAT  
TAATATACGATGACAGGGAATAAAATTTGAACGTCTTTCGTTGTTTGTCTGATCTGTGAA  
AATTACAGCAATTTTGCTTCTTTTGTCTTTACCTGTATTGGCCGGTGCAATTACTATACT

**>nigrescens**

>marmoreus

AACCAAGAAATTTAGTCATTCTTTTATGGTAAAAAGACAGTTAAGCAAA-ATTAGTCATT  
AGATCCTTAGTATAGGAGTAAAATCTAAATACTAAGAGTTATACCGAAGATGGTTT-GTT  
TGTGTTGAGTCTGTGATAGCTTTAAGGGAACTGGGATTGGATACCCATTATTTTGTAGT  
TGTAATTTAGTT--TAAGCTTACCGGAGTACTACGAATGTTTAAAACTCAAAGGGCTTG  
GCGGTGTTTTAGACCTCTCAGGGGAACCTGTCTCATAATCGATAATCCACGTTAAACCTA  
ACCTTTTATAGCAGAACAGCCTGTATACCGTCGTCGTGAGGTAACCTCTTAAAATATAGT  
AGTTAGCTTGACAATT--TA-GTTAATTAAGACGTCAGATCAAGGTGCAGCCAATAAAAA  
GGTGAGGATGGGTACAATTACATATTTGTAAATACGACACT-TGAAATAAAGTGTTCCG  
AAGGAGGACTTGAAAGTAATTTTAGTTATATAGATAGAATGAATCTGGCTCTGAAGCGTG  
CAGAATTTTAATGGTCGAACAGACCAACCTTAAAGACTTCTGCATCTTTAGGACATTCT  
GGTCCAACATCGAGGTCACAAACCTTTTTTCGATATGAGCTCTCAAAAAAGATAATGCT  
GTTATCCCTACGGTAACTAATTCCTTGATCAAAAATTT-TGGATCAAC-ACAAGTAAGA  
TTTA-AAAGGAGGCTTTATTTACTCCTCGGTTGCCCAACCAAAGT--ATTTAATAGTTT  
T-TCTTTTA-CTTAATAG--ATAAAATCTACTAATTCCTCTAAAGCTCGATAGGGTCTTC  
TTGTCTTTTAATTATATCTAGACTTTTTCATCCAGAGATAAAATCTAAGCAATCTAAAA

GAGACAGGTGTATTCTTGTCAAACCATTTCATTCCAGCCTTCAATTATAAGGCAAATGATT  
ATGCTACCTTTGCACGGTCAGAGTACCGCGGCCGTT-TAAAA-CACTGGGCAGGTCCGAC  
TTCGTATCTAAC-ACTAACACGACATTATATATTTTATTTGGAATGTGATCTGGTTTGGT  
TGGAAGTCTCTCAGGTTGTTAATTCGTGCAGAAATTAGGACAACCAGGTGCTTTGCTTGG  
GGACGATCAACTATATAATGTAATTGTAACAGCTCATGCTTTTGTATGATTTTTTTTT  
AGTAATGCCTATAATGATTGGGGGTTTTGGGAATTGATTAGTACCATTAAATATTAGGGGC  
TCCGGATATAGTATTTCCGCGTTTTGAATAATATAAGTTTTTGATTATTACCTCCTGCACT  
TTTGCTTCTTTGTCATCTGCTGCAGTAGAAAGTGGAGTTGGTACGGGGTGAAGTGTGTA  
TCCACCATTAGCCGGAATCTAGCACATGCTGGCGGGTCGGTAGACCTAGCAATTTTTTC  
CTTACATCTTGCTGGTGTCTTCTATTTTAGGGGCAGTAAATTTTATTACTACAATTAT  
TAATATACGATGACAGGGAATAAAATTTGAACGCTTTTCGTTATTTGTGTGATCTGTGAA  
GATTACAGCAATTTTGCTTCTTTGCTTTACCTGTATTGGCTGGTGCAATTACTATACT  
TTTGACTGATCGAAATTTCAATACTGCTTTTTTTGATCCGGCAGGGGGTGGTGATCCTAT  
TTTATATCAGCACTTGTTT

>eburneus

AACCAAGAAATTTAGTCATTCTTTACGGTAAAAAGATAGTTAGGCAAG-AAGGACCACT  
GGATCTTTAGTGAGGAGTAAATCTAGACACTAAAAGTTACACCGGACGTGGTTTAATT  
TGTGCTGAATCTGTGATAGCTTTAAGGGAACTGGGATTGGATACCCATTATTTATAGT  
TGTAATTTAGTT--TGAGCTTACCAGAGTACTACGAATGTTTAAACTCAAAGGGCTTG  
GCGGTGTTTTAGACCTCTCAGGGGAACCTGTCTCGTAATCGACAATCCACGTTAGACCTA  
ACCTTTTATGGCGAAACAGCCTGTATACCGTCGTCGTCAGGTAACCTCTTAAAATATAGT  
AGTTAGCTCGAGAATT--TT-ATTAATTAAGACGTCAGATCAAGGTGCAGCCAATAAAAA  
GGTGAGGATGGGTACAATTACATATTTGTAAATACGGCGTT-TGAAATTAAGTGTTTTA  
AAGGAGGACTTGAAAGTAATTTTAGTTATATAAATAGGATGAATAAGGCTCTGAAACGTG  
CAGAATTTAATGGTGAACAGACCAACCCTTAAAGACTTCTGCATCTTTAGGACATTCT  
GGTCCAACATCGAGGTCACAAACCTTTTTTTCGATATGGGCTCTTGAAAAAGATAATGCT  
GTTATCCCTACGGTAACATAATTCTTTGATCAAGAAATT-TGGATCAAC-ACAAGTAAGA  
CTTA-AGAGGAGGCTTTACTTGCTCCTCGGTTGCCCCAACCAAAGT--ATTTAATAGTTT  
T-TCTTTTA-CTTAATTG--ATAAAGTCTATTAATTTCTCTAAAGCTCGATAGGGTCTTC  
TTGTCTTTTAATTCAATCTAGGCTTTTTCACCTAAAAATAAAATTCTATAGAATCTAAAA  
GAGACAGGTGTATTCTTGTCAAACCATTTCATTCCAGCCTTCAATTATAAGGCAAATGATT  
ATGCTACCTTTGCACGGTCAGAGTACCGCGGCCGTT-TAAAA-CACTGGGCAGGTCCGAC  
TTCACATCTTGT-AATAACACGACATTATATATCTTATTTGGTATATGATCTGGGTGGT  
TGGAAGTCTCTAAGGTTGCTAATTCGTGCAGAGTTGGGACAACCGGGGGCTTTACTTGG  
AGACGATCAATTATATAATGTAATTGTGACAGCTCATGCTTTTGTATGATTTTTTTCTT  
GGTTATGCCTATGATGATTGGGGGCTTTGGAAATTGATTGGTGCCATTAAATATTAGGGGC  
TCCTGATATGGTATTTCTCGGTTAAATAATATAAGTTTTTGACTTCTTCTCCCGCACT  
TTTACTCCTTCTGTCATCGGCTGCGGTGGAAAGTGGAGTAGGTACTGGGTGGACTGTATA  
TCCACCTCTAGCAGGAAATTTGGCACATGCTGGTGGGTCTGTAGACCTGGCTATTTTCTC  
TTTACACCTTGCTGGTGTGTCTTCTATTTTGGGGGCGGTAAATTTTATTACTACAATTAT  
TAATATACGATGACAGGGGATGAAATTTGAACGCCTTTTCGTTGTTTGTATGGTCGGTGAA  
AATTACGGCTATTTTACTTTTGTATCTTTGCCTGTGTTGGCTGGTGCAATTACTATGCT  
TTTAACTGATCGGAATTTTAATACTGCTTTCTTTGATCCAGCAGGAGGTGGAGATCCTAT  
CTTATATCAGCATTATTT

>tessulatus

AACCAAGAAATTTAGTCATTCTTTACGGTAAAAAGATAGTTAGGCAAG-AAGGACCACT  
GGATCTTTAGTGAGGAGTAAATCTAGACACTAAAAGTTATACCGGACGTGGTTTAATT  
TGTGCTGAATCTGTGATAGCTTTAAGGGAACTGGGATTGGATACCCCATTTATATAGT

TGTAAATTTAGTT--TGAGCTTACCAGAGTACTACGAATGTTTAAAACCTCAAAGGGCTTG  
GCGGTGTTTTAGACCTCTCAGGGGAACCTGTCTCGTAATCGACAATCCACGTTAGACCTA  
ACCTTTTATGGCGAAACAGCCTGTATACCGTCGTCGTCAGGTAACCTCTTAAAATATAGT  
AGTTAGCTCGAGAATT--TT-ATTAATTAAGACGTCAGATCAAGGTGCAGCCAATGAAAA  
GGTGAGGATGGGTTACAATTACATATTTGTAAATACGGCGTT-TGAAACTAAGTGTTTA  
AAGGAGGACTTGAAAGTAATTTTAGTTATATAAATAGAATGAATAAGGCTCTGAAACGTG  
CAGAATTTTAATGGTGAACAGACCAACCCTTAAAGACTTCTGCATCTTTAGGACATTCT  
GGTCCAACATCGAGGTCACAAACCTTTTTTCGATATGGGCTCTTGAAAAAGATAATGCT  
GTTATCCCTACGGTAACCTAATTCTTTGATCAAAAAGTT-TGGATCAAC-ACAAGTAAGA  
CTTA-AGAGGAGGCTTTACTTGCTCCTCGGTTGCCCCAACCAAAGT--ATTTAATAGTTT  
T-TCTTTTA-CTTAATTG--ATAAAGTCTATTAACCTTCTCTAAAGCTCGATAGGGTCTTC  
TTGTCTTTTAATTCAATCTAGGCTTTTTACCTAAAAATAAAATTCTATAGAATCTAAAA  
GAGACAGGTGTATTCTTGTCAAACCATTCAATCCAGCCTTCAATTATAAGGCAAATGATT  
ATGCTACCTTTCACGGTCAGAGTACCGCGGCCGTT-TAAAA-CACTGGGCAGGTCCGAC  
TTCACATCTTAT-AATAACACGACATTATACATCTTATTTGGTATATGATCTGGGTTGGT  
TGGAACCTGCTCTAAGGTTGCTAATTCGTGCAGAGTTGGGACAACCAGGGGCTTTACTTGG  
AGACGATCAATTATATAATGTAATTGTGACAGCTCATGCTTTTGTTATGATTTTTTTCTT  
GGTTATGCCTATGATGATTGGGGGCTTTGGAAATTGATTGGTGCCACTAATATTAGGGGC  
CCCTGATATGGTATTTCTCGATTAATAATATAAGTTTTGACTTCTTCTCCCGCGCT  
TTTACTCCTTCTGTCATCAGCTGCGGTGGAAAGTGGGGTAGGTACTGGGTGGACTGTATA  
TCCACCTCTAGCAGGAAATTTGGCACATGCTGGTGGGCTGTAGATCTGGCTATTTTTTC  
TTTACATCTTGCTGGTGTGTCTTCTATTTTGGGGGCGGTAACTTTATTACTACAATTAT  
TAACATACGATGACAGGGGATGAAATTTGAACGCCTTTCGTTGTTTGTGTGGTCCGGTGAA  
AATTACGGCTATTTTACTTTTGTATCTTTCCTGTGCTGGCTGGTGCAATTACTATGCT  
TTTAACTGATCGGAATTTAATACTGCTTCTTTGATCCAGCAGGAGGTGGAGATCCTAT  
CTTATATCAGCATTATTT

>sandwichensis

AACCAAGAAATTTAGTCATTCTTTACGGTAAAAAGATAGTTAGGCAAG-AAGGACCGCT  
GGATCTTTAGTGAGGAGTAAATCTAGACACTAAGAGTTATACCGGACGTGGTTTAATT  
TATGCTGAATCTGTGATAGCTTTAAGGGAACTGGGATTGGATACCCATTATTTATAGT  
TGTAAATTTAGTT--TGAGCTTACCAGAGTACTACGAATGTTTAAAACCTCAAAGGGCTTG  
GCGGTGTTTTAGACCTCTCAGGGGAACCTGTCTCATAATCGACAATCCACGTTAGACCTA  
ACCTTTTATGGCGAAACAGCCTGTATACCGTCGTCGTCAGGTAACCTCTTAAAATATAGT  
AGTTAGCTCGAGAATT--TT-ATTAATTGAGACGCCAGATCAAGGTGCAGCTAATAAAAA  
GGTGAGGATGGGTTACAATTACATATTTGTAAATACGGCGTT-TGAAACTAAGTGTTTA  
AAGGAGGACTTGAAAGTAATTTTAGTTATATAAATAGGATGAATAAGGCTCTGAAACGTG  
CAGAATTTTAATGGTGAACAGACCAACCCTTAAAGACTTCTGCATCTTTAGGACATTCT  
GGTCCAACATCGAGGTCACAAACCTTTTTTCGATATGGGCTCTTGAAAAAGATAATGCT  
GTTATCCCTACGGTAACCTAATTCTTTGATCAAAAATTT-TGGATCAAC-ACAAGTAAGA  
CTTA-AGAGGAGGCTTTACTTGCTCCTCGGTTGCCCCAACCAAAGT--ATTTAATAGTTT  
T-TCTTTTA-CTTAATTG--ATAAAGTCTATTAACCTTCTCTAAAGCTCGATAGGGTCTTC  
TTGTCTTTTAATTCAATCTAGGCTTTTTACCTAAAAATAAAATTCTATAGAATCTAAAA  
GAGACAGATGTATTCTTGTCAAACCATTCAATCCAGCCTTCAATTATAAGGCAAATGATT  
ATGCTACCTTTCACGGTCAGAGTACCGCGGCCGTT-TAAAA-CACTGGGCAGGTCCGAC  
TTCACATCTTAT-AATAACACGACATTGTATATCTTATTTGGTATATGGTCTGGGTTGGT  
TGGAACCGCTCTAAGGTTGCTAATTCGTGCAGAGTTGGGACAACCAGGGGCTTTACTTGG  
AGATGATCAATTATATAATGTAATTGTGACAGCTCATGCTTTTGTTATGATTTTTTTCTT  
GGTTATGCCTATGATGATTGGGGGCTTTGGAAATTGATTGGTGCCATTAATATTAGGGGC

TCCTGATATGGTATTTCCCGATTAAATAATATAAGTTTTGACTTCTCCCTCCTGCACT  
TTTACTCCTTCTGTCGTCAGCTGCGGTGGAAAGTGGAGTAGGTACTGGGTGGACTGTATA  
TCCACCTCTAGCAGGAAATTTGGCACATGCTGGTGGGTCTGTAGATCTGGCTATTTTTTC  
TTTACACCTTGTCTGGTGTGTCTTCTATTTTGGGGGCGGTAAATTTTATTACTACAATTAT  
TAATATACGATGACAGGGGATGAAGTTTGAACGCCTTTCGTTGTTTGTATGGTCGGTGAA  
AATTACGGCTATTTTACTTTTGTATCTTTCCTGTGCTGGCTGGTGCAATTACTATGCT  
TTTAACCGATCGAAATTTTAATACTGCTTTTTTCGATCCGGCAGGAGGTGGAGATCCTAT  
CTTATATCAGCATTTATTT

>ermineus

NNNNNNNNNNNNNNNNNNNNNNNTTACGGTAAAAAGACAGTTAAGCAGA-AAGAATCGTT  
AGACCTTTAGTATAGGAGTAAAATCTAAATACTAGAAGTTATATCGGATACGGTTT-ATT  
TATGCTGAATCTGTGATAGCTTTAAGGGAACTGGGATTGGATACCCCATTTTATTTAGT  
CGTAAATTAAGTT--TGAGCTTACCAGAGTACTACGAATGTTTAAAACTCAAAGAGCTTG  
GCGGTGTTTTAGACCTCTCAGGGGAACCTGTCTCGTAATCGACAATCCACGTTAGACCTA  
ACCCTTTATGGCGAAACAGCCTGTATACCGTCGTCGTCAGGTAACCTCTTAAAATATAGC  
AGTTAGCTTGAGAATT--TT-ATTAATTAACGTCAGATCAAGGTGCAGCTGATAAAAG  
GGTGAGGATGGGTTACAATTACACACTTGTAAATACGATATT-TGAAATAAAATGACCTG  
AAGGAGGACTTGAAAGTAATTTTAGATATATAAATAGAATGAATAAGGCTCTGAAACGTG  
CNNNNNNNNNNNNNNNTCGAACAGACCAACCCTT-AAGACTTCTGCATCTTCAGGATATTCT  
GGTCCAACATCGAGGTCACAAACCTTTTTTTCGATATGGGCTCTGAAAAAGATAATGCT  
GTTATCCCTACGGTAACATAATTCCTTTGATCAAAATTTT-TGGATCAATTACATGTAGGA  
TTTG-AAAGGAGGCTTTATTTACTCCTCGGTTGCCCCAACCAAAGT--ATTTAGTAGTTT  
T-CCTTTTA-CTTAATTG--ATAAAGTCTACTAATTTTTCTAAAGCTCGATAGGGTCTTC  
TTGTCTTTTAATAATATTTGGACTTTTTTCATCCAAAGATAAAATCTAGGCAGCCTAAAA  
GAGACAGGTGTATTCTTGTCAAACCATTCATTCCAGCCTTCAATTATAAGGCAAATGATT  
ATGCTACCTTTGCACGGTCAGAGTACCGCGGCCGTT-TAAAA-CACTGGGCAGGTCCGAC  
TTCGTATTTAGT-TTCAACACGACATTATATATTTTATTTGGAATATGATCCGGACTAGT  
CGGAACTGCCCTAAGGTTATTAATTCGTGCAGAATTAGGACAACCAGGGGCTTTGCTAGG  
AGACGATCAGCTATATAATGTGATTGTAACGGCGCATGCTTTTGTTATAATTTTTTTCTT  
AGTAATACCTATAATGATTGGGGGTTTTGGAACTGGCTGGTGCCTTTAATGTTAGGGGC  
TCCAGATATGGTATTCCCACGCTTAAATAATATAAGTTTTTGAATTTCTCCTCCTGCGCT  
TTTGCTTCTGCTATCATCGGCTGCAGTGGAAAGTGGTGTGGGTACAGGATGGACTGTATA  
TCCACCTTTAGCAGGAAACCTAGCTCATGCTGGTGGATCTGTGGATCTAGCGATTTTTTC  
TTTACATCTTGCTGGGGTTTCTTCTATTTTAGGAGCCGTGAACCTTTATTACTACAATTAT  
TAATATACGATGGCAGGGAATGAAGTTTGAAGCTCTTTCGTTGTTTGTGTCGGTGAA  
GATTACTGCTATTTTGCTTCTTTGTGTTACCTGTGTTGGCGGTGCAATTACTATGCT  
TTTGACTGATCGGAATTTCAATACTGCTTCTTTGATCCAGCAGGAGGTGGTGATCCTAT  
CTTATATCAGCACCTATTT

>purpurascens

AACCAAGAAATTTAGTCATTCTTTTACGGTAAAAAGACAGTTAAGCAGA-AGAAATCGTT  
AGACCTTTAGTATAGGAGTAAAATCTAAATACTGAAAGTTATATCAGATACGGTTT-ATT  
TATGCTGAATCTGTGACAGCTTTAAGGGAACTGGGATTGGATACCCCACTATTTTATG  
CGTAAATTAAGTT--TGGGCTTACCAGAGTACTACGAATGTTTAAAACTCAAAGAGCTTG  
GCGGTGTTTTAGACCTCTCAGGGGAACCTGTCTCGTAATCGACAATCCACGTTAGACCTA  
ACCCTTTATGGCGAAACAGCCTGTATACCGTCGTCGTCAGGTAACCTCTTAAAATATAGT  
AGTTAGCTTGAGAATT--TT-ATTAATTAACGTCAGATCAAGGTGCAGCTGATAAAAG  
GGTGAGGATGGGTTACAATTACATACTTGTAAAAACGATATT-TGAAACAAAATAACCTG  
AAGGAGGACTTGAAAGTAATTTTAGATATATAAATAAAATGAATAAGGCTCTGAAACGTG

CAGAATTTTAATGGTCGAACAGACCAACCCTTAAGACTTCTGCATCTTCAGGATATTCT  
GGTCCAACATCGAGGTCACAAACCTTTTTTCGATATGGGCTCTTGAAAAAGATAATGCT  
GTTATCCCTACGGTAACATAATTCTTTGATCAAACTTT-TGGATCAACTACATGTAAGA  
TTTG-AAAGGAGGCTCTATTTACTCCTCGGTTGCCCCAACCAAAGT--GTTTAGCAGTTT  
T-TCTTTTA-CTTAATTG--ATAAAATCTACTAATTTTTCTAAAGCTCGATAGGGTCTTC  
TTGTCTTTTAATAATATTTGGACTTTTTCATCCAAAGATAAAATTCTAAGCAGCCTAAAA  
GAGACAGGTGTATTCTTGTCAAACCATTCATTCCAGCCTTCAATTATAAGGCAAATGATT  
ATGCTACCTTTGCACGGTCAGAGTACCGCGGCCGTT-TAAAA-CACTGGGCAGGTCCGAC  
TTCGTATTTAGT-CTCAACACNNNNNNNNNTATTTATTTGGAATATGATCCGGACTCGT  
TGGAAGTGCCTAAGGTTATTAATTCGTGCAGAATTAGGACAACCAGGAGCTTGCTGGG  
AGACGATCAGCTATATAATGTGATTGTAACGGCCCATGCTTTTGTTATAATTTTTTCTT  
AGTAATACCTATAATGATTGGGGGGTTTGAAACTGGCTGGTGCCTTTAATGTTAGGAGC  
TCCAGACATGGTATTCCTCGCTTAAATAATATAAGTTTTGACTTCTTCCTCCTGCCCT  
TTTGCTTCTGTTATCATCGGCTGCAGTAGAAAGTGGTGTGGGTACAGGATGAACTGTATA  
TCCTCCTTAGCAGGGAACCTGGCCCATGCTGGCGGATCTGTAGATCTAGCGATTTTTTC  
TTTACATCTCGCTGGGGTTTCTTCTATTTTAGGAGCTGTGAACCTTATCACTACAATTAT  
TAATATACGATGACAGGGAATAAAGTTTGAACGTCTTTCATTGTTTGTGTTGGTCGGTAAA  
GATTACTGCTATTTTACTCCTTTGTCCTTGCTGTGTTGGCGGGTGCATTACTATGCT  
TCTGACTGACCGGAATTTTAATACTGCTTCTTTGATCCAGCAGGAGGTGGNNNNNNNNNN  
NNNNNNNNNNNNNNNNNNNNNN

>arenatus

AACCAAGAAATTTAGTCATTCTTGTACGGTAAAAAGACAGTTAAGCATG-AAGGACCATT  
AGATCTTCAATAAAGGAGTAAAATCTATATATTGAAAGTTATGTTAGACGTGGTT----  
TACGCTGAATCTGTGAAATCTTTAAGGGAACTGGGATTGGATACCCCATTTTTTAGT  
CGTAAATTTAGCT--TGAGCTTACCAGAGTACTACGAATGTTTAAAACTCAAAGGGCTTG  
GCGGTGTTTTAGACCTCTCAGGGGAACCTGTCTCGTAATCGACAATCCACGTTAGACCTG  
ACCCTTTATTGTAAAACAGCCTGTATACCGTCGTCGTCAGGTAACTTTTTAAATATAGA  
AGTTAGCTAGAAAATT--AC-ATTAATTAACCGTCAGATCAAGGTGCAGCTAATAAGAG  
GGAGAGGATGGGTACAATTATAGATTTATAAATACGATATT-TGAAATGAAATATTTG  
AAGGAGGACTTGAAAGTAATTTTGATTATATAAATAGAATGAATAAGGCTCTGAAACGTG  
CAGAATTTTAATGGTCGAACAGACCAACCCTTAAGACTTCTGCATCTTTAGGATATTCT  
GGTCCAACATCGAGGTCACAAACCTTTTTTCGATATGGGCTCTTGAAAAAGATAATGCT  
GTTATCCCTACGGTAACATAGTTCTTTGATCAAACTTT-TGGATCAAC-ACAAGTTTGA  
CTTA-AAAGGAGGCTTTATTTGCTCCTCGGTTGCCCCAACCAAAGT--ATTTAATAGCTT  
T-TCTTCTA-TTTAATTG--ATCAAGCCTATTAATTTCTCTAAAGCTCGATAGGGTCTTC  
TTGTCTTTTAATAGTAACTGGACTTTTTCATCCAAAAATAAAATTCTAAACAATCTAAAA  
GAGACAGCTGTACTCTTGTCAAACCATTCATTCCAGCCTTCAATTATAAGGCAAATGATT  
ATGCTACCTTTGCACGGTCAGAGTACCGCGGCCGTT-TAAAA-CACTGGGCAGGTCCGAC  
TTCGCATCTAGT-CATAACACGACATTGTATTTTTATTTGGAATGTGATCTGGGTTAGT  
TGGAAGTGCCTAAGGTTGTTAATTCGTGCAGAGCTAGGGCAGCCTGGTGCCTTACTTGG  
GGATGATCAGCTATATAATGTAATTGTAACGGCACATGCCTTTGTTATAATTTTTTCTT  
GGTAATGCCCATGATAATTGGGGGTTTCGGAAATTGGTTAGTACCCCTAATGTTAGGGGC  
TCCAGATATGGTATTTCTCGGCTAAATAATATAAGTTTTGACTTCTTCCTCCTGCACT  
CTTGCTTTTGCTATCATCAGCTGCTGTTGAAAGAGGGGTTGGAACGGGATGAACTGTTTA  
TCCGCCTTTGGCAGGAACTTAGCACATGCTGGTGGTTCTGTAGATCTTGCAATTTTTTC  
TTTACATCTTGCTGGTGTATCCTCTATTCTAGGAGCGGTAAATTTTATTACCACAATTAT  
TAATATGCGATGACAAGGAATGAAATTCGAACGTCTTTCGCTATTTGTGTGGTCAGTAAA  
AATTACAGCTATTTTGCTCCTTTATCTCTACCGGTATTAGCGGGTGCAATTACTATACT

TTTAACTGATCGAAATTTTAATACTGCCTTCTTTGATCCAGCCGGAGGTGGTGATCCTAT  
TTTATATCAACATCTTTTC

>pulicarius

AACCAAGAAATTTAGTCATTCTTGTACGGTAAAAAGACAGTTAAGCATA-AAGGACCATT  
AGATCTTCAATAAAGGAGTAAAATCTATATATTGAAAGTTATGCTAGACGTGGTTT----  
TACGCTGAATCTGTGAAATCTTTAAGGGAACTGGGATTGGATACCCCATTTTITAGT  
CGTAAATTTAGCT--TGAGCTTACCAGAGTACTACGAATGTTTAAAACTCAAAGGGCTTG  
GCGGTGTTTTAGACCTCTCAGGGGAACCTGTCTCGTAATCGACAATCCACGTTAGACCTG  
ACCCTTTATTGTAAAACAGCCTGTATACCGTCGTCGTCAGGTAACCTTTTAAATATAGA  
AGTTAGCTAGAAAATT--AC-ATTAATTAACCGTCAGATCAAGGTGCAGCTAATAAGAG  
GGAGAGGATGGGTACAATTATAGATTTATAAATACGATATT-TGAAATGAAATATTTTCG  
AAGGAGGACTTGAAAGTAATTTTGATTATATAAATAGAATGAATAAGGCTCTGAAACGTG  
CAGAATTTTAATGGTCGAACAGACCAACCCTTAAAGACTTCTGCATCTTTAGGATATTCT  
GGTCCAACATCGAGGTCACAAACCTTTTTTCGATATGGGCTCTTGAAAAAGATAATGCT  
GTTATCCCTACGGTAACTAATTCCTTTGATCAAAATCTT-TGGATCAAC-ACAAGTTTGA  
CTTA-AAAGGAGGCTTTATTTGCTCCTCGGTTGCCCCAACCAAAGT--ATTTAATAGCTT  
T-TCTTTTA-TTTAATTG--ATCAAGCCTACTAATTTCTCTAAAGCTCGATAGGGTCTTC  
TTGTCTTTTAATAGTAACTGGACTTTTTTCATCCAAAAATAAAATTCTAAACAATCTAAAA  
GAGACAGCCGATTCTTGTCAAACCATTCATTCCAGCCTCAATTATAAGGCAAATGATT  
ATGCTACCTTTCACGGTCAGAGTACCGCGGCCGTT-TAAAA-CACTGGGCAGGTCCGAC  
TTCGCATCTAGT-CGTAACACGACATTGTATATTTTATTTGGAATGTGATCTGGGTTAGT  
TGGAAGTCCCCTAAGGTTGTTAATTCGTGCAGAGCTAGGGCAGCCTGGTGCCTTACTTGG  
GGATGATCAGCTATATAATGTAATTGTAAACGGCACATGCCTTTGTTATAATTTTTTCTT  
GGTAATGCCCATGATAATTGGGGGTTTCGGAAATTGGTTAGTACCCCTAATGTTAGGGGC  
TCCAGATATGGTATTTCTCGGCTAAATAATATAAGTTTTTGACTTCTTCCTCCTGCACT  
CTTGCTTTTACTATCATCAGCTGCTGTTGAAAGAGGGGTTGGAACGGGATGAACTGTTTA  
TCCGCCTTTGGCAGGAACTTAGCACATGCTGGTGGTTCTGTAGATCTTGCAATTTTTTC  
TTTACATCTTGCTGGTGTATCCTCTATTCTAGGAGCGGTAAATTTTATTACCACAATTAT  
TAATATGCGATGACAAGGAATGAAATTCGAACGTCTTTCGCTATTTGTGTGGTCAGTAAA  
AATTACAGCTATTTTGCTCCTTTTATCTCTACCGGTATTAGCGGGTGCAATTACTATACT  
TTTAACTGATCGAAATTTTAATACTGCCTTCTTTGATCCAGCCGGAGGTGGTGATCCTAT  
TTTATATCAACATCTTTTC

>characteristicus

AACCAAGAAATTTAGTCATTCTTGTACGGTAAAAAGACAGTTAAGCGCA-AAGGACCATC  
GGACGTTTAGTAGAGGAGTAAAATCTAAATACTGGAAATTATACCGGTATGGTTT----  
TATGCTGAATCTGTGAAATCTTTAAGGGAACTGGGATTGGATACCCCATTTTITAGT  
TGTAACCTTAGTT--TAAACTTACCAGAGTACTACGAATGTTTAAAACTCAAAGGGCTTG  
GCGGTGTTTTAGACCTCTTAGGGGAACCTGTCTCATAATCGACAATCCACGTTAGACCTG  
ACCCTTTATGGTAAAACAGCCTGTATACCGTCGTCGTCAGGTAACCTTTTAAATACATA  
AGTTAGCCCGAGAATT--AT-ATTAATTAACCGTCAGATCAAGGTGCAGCTAATGAAAG  
GGGAGGATGGGTACAATTACATATTTGTAAATACGGCATT-TGAAATAAAATGTTTAA  
AAGGAGGACTTGAAAGTAATTTTGATTATATAAACAGAATGAATAAGGCTCTGAAACGTG  
CAGAATTTTAATGGTCGAACAGACCAACCCTTAAAGACTTCTGCATCTTTAGGATATTCT  
GGTCCAACATCGAGGTCACAAACCTTTTTTTCGATATGGGCTCTTGAAAAAGATAATGCT  
GTTATCCCTACGGTAACTAATTCCTTTGATCAAAATTTT-TGGATCAAC-ACAAGTACGA  
TTCA-AAAGGAGGCTTCATTTACTCCTCGGTTGCCCCAACCAAAGT--ATTTAGTAGTTT  
T-TCTTTTA-CTTAATTG--GTAAACCTACTAATTTCTCTAAAGCTCGATAGGGTCTTC  
TTGTCTTTTAATTACACCTGGACTTTTTTCATCCAAAGATAAAATTCTAAATAATCTAAAA

GAGACAGCTGTATTCTTGTCAAACCATTCAATCCAGCCTTCAATTATAAGGCAAATGATT  
ATGCTACCTTTGCACGGTCAGAGTACCGCGGCCGTT-TAAAA-CACTGGGCAGGTCCGAC  
TTCGTATCTAAC-ACTAACACGACATTGTATATTCTATTTGGTATATGGTCTGGGCTAGT  
TGGAACCTGCTTTAAGGCTGTTAATTCGTGCGGAACCTGGGCAGCCAGGTGCTTTACTCGG  
AGACGATCAGCTATATAATGTAATTGTAACAGCGCATGCTTTTGTATAATTTTTTCTT  
GGTAATGCCTATAATAATTGGAGGCTTTGGAACTGATTGGTGCCATTAATGCTAGGGGC  
TCCAGATATGGTATTTCTCGTCTAAATAATATAAGTTTTTGGCTTCTTCTCCTGCACT  
TTTACTTTTGTATCTTCAGCTGCTGTTGAAAGTGGGGTGGGACGGGATGAACTGTTTA  
TCCGCTTTAGCAGGAAATTTGGCTCACGCCGGTGGTTCTGTAGATCTTGCGATTTTCTC  
TTTACATCTTGCCGGTGTATCTTCTATTTTAGGAGCTGTAAATTTTATTACGACAATTAT  
TAATATACGGTGACAAGGAATAAAATTTGAACGTCTTTCATTGTTTGTGTGATCAGTAAA  
AATTACGGCTATTCTACTTCTTTTATCTCTACCGGTATTAGCAGGTGCAATTACTATGCT  
TTTAACTGATCGAAATTTTAATACTGCTTCTTTGACCCTGCCGGAGGAGGTGATCCAAT  
TTGTATCAGCATCTTTT

>bullatus

AACCAAGAAATTTAGTCATT-TTTTACGGTAAAAAGACAGTTAGGCAGA-AGGAATTATT  
AGATCTTTAGTAAAGGAGTAAAATCTAAATACTAAAAGTTATACCGAATATAATT--ATT  
TGTGTTGAATCTGTGACATCTTTAAGGGAACTGGGATTGGATACCCACTATTTTATG  
TATAAATTTAGTT--TATGCTTACCAGAGTACTACGAATGTTTAAAACTCAAAGGGCTTG  
GCGGTGTTTTAGACCTCTCAGGGGAACCTGTCTCGTAATCGACAATCCACGTTAGACCTA  
ACCTTTTATGGTAATTCAGCCTGTATACCGTCGTCGCCAGGTAACCTCTTAAAAATATAGT  
AGTTAGCTTGATAATT--TA-ATTAATTAGAACGTCAGATCAAGGTGCAGCTAATAAAAA  
GGTGAGGATGGGTTACAATTATAGATTTGTAAATACGGTGCT-TGAAATGGAGCATTTC  
AAGGAGGACTTGAAAGTAATTTTGATTATATAAGCAAAATGAATAGGGCTCTGAAACGTG  
CNNNNNNNNNTGGTCGAACAGACCAACCCTT-AAGACTTCTGCATCTTTAGGATATTCT  
GGTCCAACATCGAGGTCACAAACCTTTTTTTCGATATGAGCTCTTAAAAAAGATAATGCT  
GTTATCCCTACGGTAACTAATTCCTTTAATCAAAATTCT-TGGATCAA-ACAAGCAAGA  
CTTA-AAAGGAGGCTCTATATGCTCCTCGGTTGCCCAACCAAAGT--ATTTAATAGTTT  
TATCTTTTA-CTTCATTG--AT-AAATCTATCAATTTTTCTGAAGCTCGATAGGGTCTTC  
TTGTCTTTTATTAGAATTTGGACTTTTTTCATCCAGAAATAAAATTCTAATTAATCTAAAA  
GAGACAGCTGTATTCTTGTCAAACCATTCAATCCAGCCTTCAATTATAAGGCAAATGATT  
ATGCTACCTTTGCACGGTCAGAGTACCGCGGCCGTT-TAAAA-CACTGGGCAGGTCCGAC  
TTCGTATTTAGA-ACCTACACGACATTGTATTTTTATTTGGAATATGATCAGGTCTGGT  
TGGAACGGCCTTAAGGCTCTTGATTCTGTGCGGAATTAGGACAACCTGGTGCTTGCTCGG  
AGATGATCAGTTATATAATGTGATTGTAACGGCTCATGCCTTTGTTATAATTTTTTCTT  
AGTAATACCTATAATGATTGGCGTTTTTGGAACTGGCTGGTACCTTTAATATTGGGAGC  
TCCAGATATGGTATTTCTCGATTGAATAATATGAGTTTTTGGCTCCTTCCTCCTGCGCT  
TTTACTTCTTCTGTCTCGGCTGCAGTAGAAAGCGGGGTAGGTACAGGTTGAACTGTATA  
TCCTCCCTTGGCAGGAAACCTGGCACATGCTGGTGGTTCTGTAGATCTGGCAATTTTTTC  
TTTACATCTTGCTGGTGTTCCTTCTATTTTAGGTGCAGTAAATTTTATTACTACAATTAT  
TAACATACGATGACAAGGGATGAAATTTGAGCGTCTTCTTTGTTTGTATGATCGGTAAA  
GATTACAGCAATTTTGCTTCTTTATCTCTACCTGTCTTAGCGGGTGCTATTACTATGCT  
TTTGACTGATCGGAATTTAATACTGCTTCTTTGATCCAGCAGGAGGTGGTGATCCTAT  
TTGTATCAGCATCTATT

>sponsalis

AACCAAGAAATTTAGTCATTCTTTCACGGTAAAAAGACAGTTAGACAGA-AAAAAATCGTT  
GGACCTTTGGTATAGGAGTAAAATCTAAATACCGAAAGTTATATCAGGTGCGATTT-AGT  
CATGTTGAATCTGTGATAGCTTTAAGGGAACTGGGATTGGATACCCCATTTTATTTAGT



CATAAATATAGTA--TAGACTTACCGGAGTACTACGAATGTTTAAAACTCAAAGGGCTTG  
GCGGTGTTTTAGACCTCTCAGGGGAACCTGTCTCGTAATCGACAATCCACGCTAGACCTG  
ACCTTTTATGGTAATACAGTCTGTATACCGTCGTCGTCAGGTAACCTCTTAAATATAGT  
AGTTAGCATGAAAATT--TTGATTAATTAAGACGTCAGATCAAGGTGCAGCCAATAAAAA  
GGTGAGGATGGGTTACAATTATATAATTATAACTACGGTACT-TGAAAAGAAGTGTTCA  
AAGGAGGACTTGAAAGTAATTTTAATTATATAAAATAAAATGAATTAGGCTCTGAAACGTG  
CAGAATTTTAATGGTCGAACAGACCAACCCTTAAAGACTTCTGCATCTTCAGGATATTCT  
GGTCCAACATCGAGGTCACAAACCTTTTTTCGATATGGGCTCTTGAAAAAGATTATGCT  
GTTATCCCTACGGTAACATAATTCTTTGATCAAAATTAC-TGGATCAAC-ACAAGTAAGA  
TTTG-AAAGGAGGCTTTGTCTGCTCCTCGGTTGCCCCAACCAAAGT--GTTAGTAACCT  
T-TCTTTTA-CTTAATTG--ATAGAGTTTACTAATTTCTCTAAAGCTCGATAGGGTCTTC  
TTGTCTATTAATTATATCTGGACTTTTTTCATCCAAAAATAAAGTTCTAAATAATCTAAAG  
GAGACAGGGGTATTCTTGTCAAACCATTCAATCCAGCCTTCAATTATAAGGCAAATGATT  
ATGCTACCTTTGCACGGTCAGAGTACCGCGGCCGTT-TAAAA-CACTGGGCAGGTCCGCAC  
TTCGATTTTATT-ATCTACACGACATTATACATTTTGTGGGAATATGATCGGGACTGGT  
TGGAAGTCTCTAAGGTTGTTAATTCGTGCAGAGCTAGGGCAACCTGGTGCTCTTCTTGG  
AGATGATCAATTGTACAACGTAATTGTAACAGCCCATGCTTTTGTATAATTTTTTCTT  
AGTAATACCTATGATGATTGGGGGATTGGAAATTGATTAGTACCTTTAATGTTGGGAGC  
TCCCGATATGGTGTTTCTCGTTTAAATAATATGAGTTTTGACTTCTCCCTCCTGCACT  
TTTGCTTCTCTTGTCGTCAGCTGCAGTGGAAGTGGCGTTGGTACAGGATGAACAGTATA  
TCCACCTTTGTCAGGAAACCTGGCCCATGCTGGTGGGTCTGTAGATTTAGCAATTTTTTC  
TCTACATCTTGCTGGTGTGTCGTCTATTTTAGGTGCAGTAAATTTTATTACTACAATTAT  
TAACATACGATGACAAGGAATAAAGTTTGAACGTCTTTCATTGTTTGTCTGATCGGTAAA  
AATTACAGCTATTTTACTTCTTTTATCTCTACCTGTGTTGGCCGGTGCTATTACTATGCT  
TTTAACAGATCGGAATTTAATACTGCCTTCTTTGATCCAGCAGGAGGTGGTGATCCAAT  
TTTATATCAACACTTGTTT

>nux

AACCAAGAAATTTAGTCATTCTTTACGGTAAAAAGACAGTTAGACAGA-AAAAATCGTT  
GGACCTTTGGTATAGGAGTAAATCTAAATACCAAAAGTTATATCAGGTGCGATTT-AGT  
CATGTTGAATCTGTGATAGCTTTAAGGGAACTGGGATTGGATACCCCACTATTTTATAGT  
CATAAATATAGTA--TAGACTTACCGGAGTACTACGAATGTTTAAAACTCAAAGGGCTTG  
GCGGTGTTTTAGACCTCTCAGGGGAACCTGTCTCATAATCGACAATCCACGCTAGACCTG  
ACCTTTTATGGTAAACAGTCTGTATACCGTCGTCGTCAGGTAACCTCTTAAATATAGT  
AGTTAGCATGAAAATT--TTGATTAATTAAGACGTCAGATCAAGGTGCAGCCAATAAAAA  
GGTGAGGATGGGTTACAATTATATAGTTATAAATACGGTACT-TGAAACGAAGTGTTTCA  
AAGGAGGACTTGAAAGTAATTTTAATTATATAAAATAAAATGAATTAGGCTCTGAAACGTG  
CAGAATTTTAATGGTCGAACAGACCAACCCTTAAAGACTTCTGCATCTTCAGGATATTCT  
GGTCCAACATCGAGGTCACAAACCTTTTTTCGATATGGGCTCTTGAAAAAGATTATGCT  
GTTATCCCTACGGTAACATAATTCTTTGATCAAAATTAT-TGGATCAAC-ACAAGTAAGA  
TTTG-AAAGGAGGCTTTCCTGCTCCTCGGTTGCCCCAACCAAAGT--GTTAGTAACCT  
T-TCTTTTA-CTTAATTG--ACAGAGTTTACTAATTTCTCTAAAGCTCGATAGGGTCTTC  
TTGTCTATTAATTATATCTGGACTTTTTTCATCCAAAAATAAAGTTCTAAATAATCTAAAG  
GAGACAGGGGTATTCTTGTCAAACCATTCAATCCAGCCTTCAATTATAAGGCAAATGATT  
ATGCTACCTTTGCACGGTCAGAGTACCGCGGCCGTT-TAAAA-CACTGGGCAGGTCCGCAC  
TTCGATTTTATT-ATCTGCACNNNNNNATACATTTTGTGGGAATATGATCGGGACTGGT  
TGGAAGTCTCTAAGGCTGTTGATTCGTGCAGAGCTAGGGCAACCTGGTGCTCTTCTTGG  
AGATGATCAGTTGTATAACGTAATTGTAACAGCCCATGCTTTTGTATAATTTTTTCTT  
AGTAATACCTATGATGATTGGGGGATTGGAAATTGATTAGTACCCTTAATGTTGGGAGC

TCCCGATATGGTGTTCCTCGTTTAAATAATATGAGTTTTGACTTCTCCCTCCTGCACT  
TTTGCTTCTCTGTGCTGACGTGCAGTGGAAAGTGGCGTTGGTACAGGATGAACAGTATA  
TCCACCTTTGTCAGGAAACCTGGCTCATGCTGGTGGATCTGTAGATTTAGCAATTTTTTC  
TCTACATCTTGCTGGTGTATCATCTATTTAGGTGCAGTAAATTTTATTACTACAATTAT  
CAACATACGATGACAAGGAATAAAGTTTGAACGTCTTTCCTGTTTGTCTGATCGGTAAA  
AATTACAGCTATTTACTTCTTTATCTTTACCTGTGTTGGCTGGTGCTATTACTATGCT  
CTTGACAGATCGGAATTTTAATACTGCTTTCTTTGATCCAGCGGGAGGTGGTGATCCAAT  
TTTATATCAACACTTGTTT

>musicus

AACCAAGAAATTTAGTCATTCTTTACGGTAAAAAGACAGTTAGACAGA-AAAAATCGTT  
GGACCTTTGGTATAGGAGTAAATCTAAATACCAAAGCTATATCAGATGCGGTTT-GGT  
TATGTTGAATCTGTGATAACTCTAAGGGAACTGGGATTGGATACCCCACTATTTTTAGT  
CATAAATTTAGTA--TGGACTTACCAGAGTACTACGAATGTTTAAACTCAAAGGGCTTG  
GCGGTGTTTTAGACCTCTCAGGGGAACCTGTCTCATAATCGACAATCCACGTTAGACCTA  
ACCTTTTATGGTAATACAGTCTGTATACCGTCGTCGTCAGGTAACCTTCTAAAATATAGT  
AGTTAGCATGAAAATC--TTGATTAATTAAGACGTCAGATCAAGGTGCAGCCAATAAAAA  
GGTGAGGATGGGTTACAATTATATAATTATAAATACGGCACT-TGAAATGAAGTGTCTCA  
AAGGAGGACTTGAAAGTAATTTTAATTATATAAATAAAATGAATTAGGCTCTGAAACGTG  
CAGAATTTAATGGTGAACAGACCAACCCTTAAGACTTCTGCATCTTTAGGATATTCT  
GGTCCAACATCGAGGTCACAAACCTTTTTTTCGATATGGGCTCTGAAAAAGATTATGCT  
GTTATCCCTACGGTAACATAATTCCTTTGATCAAAATTAT-TGGATCGAC-ACAAGTAAGA  
TTTA-AAAGGAGGCTTTGTTTGCTCCTCGGTTGCCCCAACCAAAGT--GTTTAGCAATCT  
T-TCTTTTA-CTTAATTG--GTAAAGTTTACTAATTTCTCTAAAGCTCGATAGGGTCTTC  
TTGTCTATTAATTGTATCTGGACTTTTTATCCAAAAATAAAGTTCTAAATAATCTAAAA  
GAGACAGGGGATTCTTGTCAAACCATTATCCAGCCTTCAATTATAAGGCAAATGATT  
ATGCTACCTTTGCACGGTCAGAGTACCGCGGCCGTT-TAAAA-CACTGGGCAGGTCCGAC  
TTCGTATTTATT-ATTTGCACGACATTATACATTTTGTGGAATATGATCAGGATTGGT  
TGGAATGCTCTAAGGTTGTTAATTCTGTCAGAGTTAGGGCAGCCTGGTGCTCTTCTCGG  
AGATGATCAGCTATATAACGTAATTGTAACAGCCCATGCCTTTGTTATAATTTTTTTCTT  
AGTAATACCTATGATGATTGGGGGATTGGAAATTGATTAGTGCCTCTGATGTTGGGAGC  
TCCTGATATGGTGTTCCTCGTTTAAATAATATAAGTTTTTGACTTCTTCTCCTGCACT  
CTTGCTTCTTCTGTCGTCAGTGCAGTGGAAAGTGGTGTGGTACAGGATGGACGGTATA  
TCCACCTTTGTCGGGGAATCTGGCTCATGCTGGTGGATCTGTAGATTTAGCAATTTTTTC  
CTTGATCTTGCTGGTGTGTCATCTATTTAGGTGCAGTAAATTTTATTACTACAATCAT  
CAATATACGATGGCAAGGAATAAAATTTGAACGTCTTTCATTATTTGTTTGATCGGTAAA  
AATTACAGCTATCTTACTTCTTTATCATTACCCGTGTTAGCCGGTGCAATCACTATGCT  
TTTAACAGATCGGAATTTTAATACTGCCTTCTTTGATCCAGCAGGAGGANNNNNNNNNN  
NNNNNNNNNNNNNNNNNNNN

>thalassiarthus

AACCAAGAAATTTAGTCATTCTTTTATGGTAAAAAGACAGTTAGGCAGA-GAAGGCCATA  
AGATCTCTAATATAGGGGTAAAATCTAAATACTAGAAGTTATCTCAAGCATGGCTT-ATT  
TGTGTTGAGTCTGTGATAGCTTTAAGGGAACTGGGATTGGATACCCCACTATTTTTAGT  
TGTAATTTAGTT--TGAACCTACCAGAGCACTACGAACGTTTAAACTCAAAGGGCTTG  
GCGGTGTTTTAGACCTCTCAGGGGAACCTGTCTCGTAATCGATAGTCCACGTTAAACCTG  
ATCTCTGTAGTAATGCAGCCTGTATACCGTCGTCGTCAGGTAACCTTCTAAAATATAGG  
AGTTAGCAGGATAATC--AG-ATTAGTTAAGACGTCAGATCAAGGTGCAGCTAATAAAGA  
GGTGAAGATGGGTTACACTTATACATTTATAAATACGATACT-TGAAATAAAGTACTTTG  
AAGGAGGACTTGAAAGTAATCTTAATTATATAAATAAGATGAATATGGCTCTGAAACGTG

CAGAATTTTAATGGTCGAACAGACCAACCCTTGAAGACTTCTGCATCTTCAGGACATTCT  
GGTCCAACATCGAGGTCACAAACCTTTTTTCGATATGGGCTCTTAAAAAGATAATGCT  
GTTATCCCTACGGTAACTAATTCTTTGCTCAAAAATTT-TGGATCAAC-ATAAGTAAAA  
CTTA-AAAGGAGGCTTTCTTTACTCCTCGGTTGCCCCAACCAAAGT--ATTTAGTAGCTT  
--CATTTTA-TTTAACTA--TTAAAGTCTACTAGTTTCTCTAAAGCTCGATAGGGTCTTC  
TTGTCTTTTAATTCTATCTGGACTTTTTCATCCAAAAATGAAATTCTAAATAATCTAAAA  
GAGACAGATGTATTCTTGTCAAACCATTCAATCCAGCCTTCAATTATAAGGCAAATGATT  
ATGCTACCTTTGCACGGTCAGAGTACCGCGGCCGTT-TAAAA-CACTGGGCAGGTCCGAC  
TTCGTATTTAAT-ATTGACATGACATTGTATATTTATTTGGTATATGATCTGGGTAGT  
TGGAACGGCCTTAAGGTTATTAATTCGTGCAGAACTAGGGCAACCCGGCGCTTTACTTGG  
AGATGATCAGTTGTATAATGTAATTGTAACAGCTCATGCTTTTGTATAATTTTTTTCTT  
AGTAATACCTATAATAATTGGTGGCTTTGGAACTGATTGGTACCGTTGATACTAGGGGC  
TCCAGACATAGTTTTTCCACGTTTAAATAACATAAGTTTTTGGCTTTTGCCTCCTGCTCT  
TTTACTTCTTTGTATCAGCTGCTGTAGAAAGTGGAGTAGGAACAGGATGGACTGTATA  
TCCACCTTTAGCTGGAACTTAGCACATGCTGGTGGTTCTGTAGATCTAGCAATTTTCTC  
TTTGCATCTTGCTGGGGCTTCTCTATTTTAGGAGCAGTAAATTTTATTACCACAATTAT  
TAATATACGATGGCAAGGAATGAAATTTGAACGTCTTTCATTGTTTGTATGGTCTGTGAA  
AATTACAGCTATTTTACTCCTTTTATCTTTGCCTGTTTTGGCTGGAGCTATTACTATGCT  
TTTAACTGATCGGAATTTTAATACTGCCTTCTTTGATCCTGCTGGAGGCGGGGATCCTAT  
TTGTACCAACACTTATTT

>betulinus

AACCAAGAGATTTAGTCATTCTTTTATGGTAAAAAGACAGTTAGGCAAG-AAGGACCATT  
AGATCTTTAGTATAGGGGTAAAATCTATATACTAAAAGTTATACCGGGCGTGGTTT-ATT  
TGTGCTGAATCTGTGATAGCTTTAAGGGAACTGGGATTGGATACCCATTATTTCTAGT  
TGTAATTTAGTT--TAAGCTTACCAGAGTACTACGAATGTTTAAACTCAAAGGGCTTG  
GCGGTGTTTTAGACCTCTTAGGGGAACCTGTCTCGTAATCGACAATCCACGTTAGACCTA  
ACCTTTTGTGGCATGACAGCCTGTATACCGTCGTCGTCAGGTAACCTTCTAAAATATAGT  
AGTTAGCCCGAGAACT--TT-ATTAGTTAAAACGTCAGATCAAGGTGCAGCTAATAAAG  
GGTGAGGATGGGTACAATTATAGATTTATAAGTACGGGATT-TGAAATGGAGTGTTGA  
AAGGAGGACTTAAAAGTAATTTTGATTATATAAGCAGAATGAATATGGCTCTGAAACGTG  
CAGAATTTTAATGGTCGAACAGACCAACCCTTAAAGACGTCTGCATCTTTAGGACATTCT  
GGTCCAACATCGAGGTCACAAACCTTTTTTCGATATGGGCTCTTAAAAAGATAATGCT  
GTTATCCCTACGGTAACTAATTCTTTGATCAGAACTC-TGGATCAAC-ACAAGTAAGG  
CTAT-AAAGGAGGCTTTTTATGCTCCTCGGTTGCCCCAACCAAAGT--TTTAGTAGACT  
TGTCTTTTA-CTAAATTA--ACAAAATCTACTAGCTCCTCTAAAGCTCGATAGGGTCTTC  
TTGTCTTTTAATTATATCTGAACTTTTTCATTGAGAGATAAAATTCTAAGTAATCTAAAA  
GAGACAGCTGTATTCTTGTCAAACCATTCAATCCAGCCTTCAATTATAAGGCAAATGATT  
ATGCTACCTTTGCACGGTCAGAGTACCGCGGCCGTT-TAAAA-CACTGGGCAGGCCCCGAC  
TTCGTATCTAAC-CTCCACACGACATTGTATATTTTATTCTGGGATATGGTCTGGTTTAGT  
CGGAACTGCATTAAGATTGTTGATTCTGTCAGAAATTAGGGCAGCCTGGTGTCTTACTGGG  
GGACGATCAGCTATATAATGTAATTGTAACAGCTCATGCTTTTGTATAATCTTTTTCTT  
GGTAATGCCTATAATGATTGGGGGTTTCGGAAATTGATTGGTGCCTTTGATATTAGGGGC  
TCCAGATATAGTGTTTCCCCGCTTAAATAATATAAGTTTTGACTTCTTCTCCTGCACT  
TTTACTTTTGTATCGTCGGCCGCGGTAGAGAGTGGAGTGGGTACGGGGTGAAGTGTGTA  
TCCGCTTTTGGCAGGAACTTGGCACATGCTGGTGGATCTGTAGATCTAGCAATTTTCTC  
TTTACATCTTGCAGGAGTATCTTCTATCTTAGGGGCAGTAAATTTTATTACGACAATTAT  
TAATATACGATGACAGGGAATAAAATTTGAGCGTCTTCTTTGTTTGTCTGATCGGTGAA  
GATTACGGCTATTTTACTTCTTTTGTCTTACCTGTATTGGCTGGGGCAATTACTATGCT

TTTGA CTGATCGAACTTTAATACTGCATTCTTTGATCCAGCAGGAGGTGGTGACCCTAT  
TTTGTACCAGCATTTGTTT

>figulinus

AACCAAGAAATTTAGTCATTCTTTTACGGTAAAAAGACAGTTAGGCAAA-AGGAATCATT  
GGATCTTTAGTATAGGAGTAAAATCTAGATACTAAAAGTTATACCTGGCATGATTT-GTT  
TGGGCTGAATCTGTGATAGCTTTAAGGGAACTGGGATTGGATACCCCATTTTCTAGT  
TGTAATTTAGTT--TGGGCTTACCGGAGTACTACGAATGTTTAAACTCAAAGGGCTTG  
GCGGTGTTTTAGACCTCTTAGGGGAACCTGTCTCGTAATCGACAATCCACGTTAAACCTA  
ACCCTTTGTGGCATGACAGCCTGTATACCGTCGTCGTCAGGTAACCTCTTAAATATAGT  
AGTTAGCTCGAGAACA--TT-GTTGGTAAAACGTCAGATCAAGGTGCAGCTAATAAAAG  
GGTGAGGATGGGTACAATTATATTTATAAGTATGACATT-TGAAATGAAATGTCTTG  
AAGGAGGACTTAAAGTAATTTTGATTATATAAATAAAATGAATATGGCTCTGAAACGTG  
CAGAATTTAATGGTCGAACAGACCAACCCTCAAAGACGTCTGCATCTTTAGGACATTCT  
GGTCCAACATCGAGGTCACAAACCTTTTTTTCGATATGGGCTCTTGAAAAAGATAATGCT  
GTTATCCCTACGGTAACTAATTCCTTTGATCAAAAACCTC-TGGATCAAC-ACGAGTAAGA  
CTAT-AAAGGAGGCTTTATCTACTCCTGGTTGCCCCAACCAAAAT--TTTAACTAGACT  
CGTCTTTTA-CTTAATTG--ACAAAATCTACTAATCTTCTAAAGCTCGATAGGGTCTTC  
TTGTCTTTAATTATATCTGAACCTTTTCATTAGAAATAAAATTCTAAACAATCTAAAA  
GAGACAGCTGTATTCTGTCAAACCATTCATTCCAGCCTTCAATTATAAGGCAAATGATT  
ATGCTACCTTTCACGGTCAGAGTACCGCGGCCGTT-TAAAA-CACTGGGCAGGCCCGAG  
TTCGTATCTAGC-ATCCACACGACATTGTATATTTTATTTGGGATGTGGTCTGGCTTAGT  
TGGAATGCATTGAGGTTGCTAATTCGTGCAGAGTTAGGGCAGCCTGGTGCTTTACTTGG  
AGACGATCAATTGTATAATGTGATCGTAACGGCGCATGCTTTTGTTATAATTTTTTCTT  
AGTGATGCCTATGATGATTGGGGGCTTTGGGAATTGATTGGTACCATTGATGTTAGGGGC  
TCCAGATATAGTATTTCTCGGTAAATAACATAAGTTTTGGCTTCTTCTCCTGCACT  
TTTGCTTCTCTTGTCTCGCGCCGCGGTGGAGAGCGGAGTGGGTACAGGGTGAACGTGATA  
TCCACCTTTGGCTGGTAATTTGGCGCATGCTGGTGGGTCTGTAGATCTTGCGATTTTTTC  
TTTACATCTTGCTGGAGTATCTTCTATTTTGGGGGCGGTAAATTTTATTACTACGATTAT  
TAATATACGATGACAGGGAATAAAGTTTGAACGTCTTTCGTTGTTTGTCTGATCAGTGAA  
GATTACGGCTATTTTGCTTTTATTGTCTTTACCTGTATTGGCGGGAGCAATTACTATGCT  
TTTGA CTGRTCGAAATTTAATACTGCTTTTTTTGATCCAGCAGGAGGTGGTGATCCTAT  
CTTGTATCAGCACTTATTT

>cordigera

AACCAAGAAATCTAGTCATTCTTTTACGGTAAAAAGACAGTTAAACAAATAGGAGCCATT  
GGACCTTTAGTGTAGGAGTAAAATCCGAATACTAAAAGTTACACCCGGTATGGTTT-GTT  
TTCGTTGAATCTGTGATAGCTTTAAGGGAACTGGGATTGGATACCCCATTTTATAGC  
TGTAATTTAGTT--TAAGCTTACCCGAGTACTACGAATGTTTAAACTCAAAGGACTTG  
GCGGTGTTTTAGACCTCTTAGGGGAACCTGTCTCGTAATCGACAATCCGCGTTAAACCTG  
ACCTTTTTTAGTAG-ACAGCCTGTATACCGTCGTCGTCAGGTAACCTCTTAAATATAAT  
GGTAGCTTGAGAAAT--AG-ATGAATAAAACGTCAGATCAAGGTGCAGCTGATAAAAA  
GGTGAGGATGGGTACAATTATATTTGTAATTACGGTGCT-TGAAATAAAGTATATTG  
AAGGAGGACTTAAAGTAATCTAATTATATAGATAGAATGAATAGGGCTCTGAAACGTG  
TAGAATTTAATGGTCGAACAGACCAACCCTTAAAGACTTCTGCATCTTTAGGATATTCT  
GGTCCAACATCGAGGTCACAACTTTTTTTTCGATATGAGCTCTTAAAAAATAATGCT  
GTTATCCCTACGGTAACTAATTTCTTTGATCAAAAACCTT-TGGATCAAC-ACGAGAAGGT  
TTTA-AAAGGAGGTTTTGCTTACTCCTCGGTGCCCCAACCAAGT--ATTTAATAGTTT  
T-ATTTT--CTTAATTG--ATAAGGCCTATTAACCTCTTCTAAAGCTCGATAGGGTCTTC  
TTGTCTTTAATAATATCTAGACTTTTTTCATCCAAGATAAAATTCTAAGCAGTCTAAAA

GAGACAGACGTATTCTTGTCAAACCATTTCATTCCAGCCTTCAATTATAAGGCAAGTGATT  
ATGCTACCTTTGCACGGTCAGAGTACCGCGGCCGTT-TAAAA-CACTGGGCAGGTCCGAC  
TTCGTATCTGGT-ATTAACACGACATTATATATTCTATTTGGAATGTGATCTGGGTTGGT  
TGGAACCTGCTCTTAGACTATTAATTCGTGCAGAGTTGGGGCAGCCAGGTGCTTTGCTTGG  
GGATGATCAGCTATATAATGTGATTGTGACGGCTCATGCTTTTGTATAATTTTCTTTCT  
GGTGATGCCTATAATAATTGGGGGCTTCGGGAACTGATTAGTGCCTTTGATACTAGGGGC  
TCCGGATATGGTGTTTCCGCGTTTAAATAATATAAGTTTCTGGCTTTTACCGCCTGCACT  
TTTACTTTTATTGTCGTGCGCCGCAGTGGAGAGAGGAGTGGGTACTGGATGAACTGTGTA  
TCCACCTTTAGCAGGAAATTTAGCTCATGCTGGAGGATCTGTAGATCTGGCAATTTTTTC  
TTTGATCTTGCTGGTGTTTCTTCTATTTTGGGGGCAGTAAATTTTATTACTACCATTAT  
TAATATACGGTGACAAGGAATGAAGTTTGAACGTCTTTCATTGTTTGTGTGGTCTGTAAA  
AATTACAGCTATTTTGCTTCTTTTATCTTTACCTGTATTAGCTGGGGCAATTACTATGCT  
TTTGACTGATCGAAATTTTAATACTGCTTTTTTTGACCCAGCAGGAGGTGGTGATCCAAT  
TTTATATCAGCACTTGTTT

>nobilis

AACCAAGAAATTTAGTCATTCTTTACGGTAAAAAGACAGTTAGGCGAA-AGGAATCATT  
GGACCTTTAGTACAGGAGTAAATCTGAATACTAAAAGTTATACCTAACATGGTTC-ATT  
TTTGTTGAATCTGTGATAGCTTTAAGGGAACTGGGATTGGATACCCATTATTTCTAGT  
CGTAAATTTAGTT--TAAATTTACCGGAGTACTACGAATGTTTAAACTCAAAGGACTTG  
GCGGTGTTTTAGACCTCTCAGGGGAACCTGTCTCGTAATCGACAATCCGCGTTAAACCTA  
ACCTTTTTTGGTAATACAGCCTGTATACCGTCGTCGCCAGGTAACCTCTTAAAGTATAGT  
AGTTAGCTTGAGAATT--TA-GTAAATTAACCGTCAGATCAAGGTGCAGCTAATAAAAA  
GGTGAGGATGGGTACAATTATATTTATAAAATACGATACT-TGAAATAAAGCGTTTTG  
AAGGAGGACTTGAAAGTAATTTTAATTATATAAAATAAATGAATAAGGCTCTGAAACGTG  
CAGAATTTAATGGTGAACAGACCAACCTTTAAAGACTTCTGCATCTTTGGGGTATTCT  
GGTCCAACATCGAGGTCACAACTTTTTTTTCGATATGAGCTCTTGAAAAAATGATGCT  
GTTATCCCTACGGTAACTAATTTCTTTGATCAAAAATTT-TGGATCAGC-ACAAGCAAGA  
TTTA-AAAGGAAGCTTTTTCTGCTCCTCGGTTGCCCCAACCAAAGT--ATTTAATAGTTT  
T-ACTTTTA-CTTAATTA--GTAAATCTATTAACCTCTCTAAAGCTCGATAGGGTCTTC  
TTGTCTTTTAATCATATCTGGACTTTTTTATCCAAAAATAAAATTCTAAGCAATCTAAAA  
GAGACAGGCGTATTCTTGTCAAACCATTTCATTCCAGCCTTCAATTATAAGGCAAATGATT  
ATGCTACCTTTGCACGGTCAGAGTACCGCGGCCGTT-TAAAA-CACTGGGCAGGTCCGAC  
TTCGTATTTGAT-ATCAACACGACATTGTATATTTTATTTGGGATGTGATCTGGGTAGT  
TGGGACTGCCCTCAGATTACTGATTTCGTGCAGAGTTAGGACAGCCAGGTGCCTTGCTTGG  
AGATGATCAGTTGTATAATGTAATTGTAACAGCACACGCTTTTGTATGATTTTTTTCT  
AGTAATACCTATAATGATTGGGGGCTTTGGGAATTGATTGGTACCTTTAATATTAGGGGC  
CCCGGATATGGTGTTTCCGCGTTTAAATAATATAAGTTTTTGACTTTTACCGCCTGCGCT  
CTTACTTTTGTGTCCTCAGCTGCGGTAGAAAGCGGGGTGGGTACAGGATGGACTGTGTA  
TCCGCCTCTAGCAGGGAATTTAGCGCATGCTGGAGGATCTGTAGATCTGGCAATTTTTTC  
TTTGATCTTGCTGGGGTTTCTTCTATTTTAGGAGCAGTGAATTTCACTACTACAATTAT  
TAATATACGATGACAAGGAATGAAGTTTGAGCGTCTTTCATTATTTGTATGATCTGTAAA  
AATTACGGCTATTTTACTTCTTTTGTCTTTACCTGTATTAGCTGGAGCAATTACTATACT  
TTTAACTGATCGAAATTTTAATACCGCTTCTTTGATCCAGCAGGGGGTGGTGATCCAAT  
TTTATACCAACATTTATTT

>cuvieri

AACCAAGAAATTTAGTCATTCTTTTACGGTAAAAAGACAGTTAGGCAAA-AGCGATTATT  
AGATCTTTAGTAGAGGGGTAAATCTATACTAAAAGTTATTCCTGAAATGATTT-GCT  
-AAGCTGAATCTGTGACAACTTTAGGGGAACTGGGATTGGATACCCCATTTATTTTAGT

CGTAAATTTAGTT--TA-ACCTACCTGAGTACTACGAATGTTTAAACTCAAAGGGCTTG  
GCGGTGTTTTAAACCTTTCAGGGGAACCTGTCTCGTAATCGACAATCCACGTTATACCTA  
ACCTCTTATAGTGAAACAGCCTGTATACCGTCGTCGCCAGGTAACCTCTAAAAATAGAGT  
AGTTAGCTTGAAAATC--TA-ATTGATTAGGACGTCAGATCAAGGTGCAGCTAATGAAGA  
GGTGAGGATAGGTTACAATTACATATTTGTAAATACGGCACT-TGAAATAAG--TGCTTA  
AAGGAGGACTTGAAAGTAATCGTAATTATATAAATAAAATGAATAAGGCTCTGAAACGTG  
CAGAATTTTAATGGTGAACAGACCAACCCTTAAAGACTTCTGCATCTTTAGGACATTCT  
GGTCCAACATCGAGGTCACAAACCTTCTTTTCGATATGATCTCTTAAAAAAGATAATGCT  
GTTATCCCTACGGTAACTAATTCTTCAATCAAAAATTT-TGGATCAAT-ACAAGTCAGA  
TTTT-AAAGGAGGCTTTAAATGCTCCTCGGTTGCCCCAACCAAAGT--CTTTAATAGTTT  
T-TCTTTTA-GTTAATTG--ACCAAATCTATTAATTTTCTAAAGCTCGATAGGGTCTTC  
TTGTCTTTTAATATGATCTGGACTTTTTTCATCCAGAAATAAAATTCTAGATAGTCTAAAA  
GAGACAGGTATATTCTTGTCAAACCATTCTAGCCTTCAATTATAAGGCAAATGATT  
ATGCTACCTTTGCACGGTCAGAGTACCGCGGCCGTT-TAAAA-CACTGGGCAGGTCCGAC  
TTCGTATCTTAT-ACGAACACTACATTGTATATTTGTTGGGATATGATCTGGATTGGT  
TGGTACTGCTTTAAGATTGTTAATCCGTGCAGAGTTAGGTCAACCAGGTGCTTTACTTGG  
GGATGACCAATTATACAATGTTATTGTAACAGCCCATGCTTTTGTTATGATCTTTTTCTT  
GGTAATACCTATAATAATTGGGGGTTTTGGGAATTGACTTGACCCTAATGCTAGGCGC  
TCCAGATATAGTATTTCTCGTCTAATAATATAAGTTTTTGGCTTCTTCTCCTGCTCT  
TTTACTTCTTTTATCTTCAGCTGCTGTGGAAGTGGAGTGGGTACGGGGTGGACTGTATA  
TCCTCCTTTAGCTGGAAATTTAGCTCATGCTGGGGGGTCAGTAGATCTAGCGATTTTTTC  
TTTACATTTAGCTGGGGTATCTTCTATTTTGGGGGCAGTAAATTTTATTACCACAATTAT  
TAACATACGATGACAGGGAATAAAATTTGAACGTCTTTCATTATTTGTGTGGTCAGTGAA  
GGTACGGCTATTTTACTTCTTTTATCTCTACCTGTATTGGCTGGTGCAATTACTATATT  
ATTAAGTATCGGAATTTTAATACTGCTTCTTTGACCCAGCAGGGGGTGGGGATCCTAT  
TTTATATCAGCACCTTTTC

>geographus

AACCAAGAAATTTAGTCATTCTTTTGTTGTAAGGACAGTTAGATAGA-CATAATTATT  
AGATCCTTAATAGAGGAGTAAATCTATATATTAAGTTATTCCTGAAATGATT-GCT  
TATATCGAATCTGTGACAACCTTAAGGGAACTGGGATTGGATACCCATTATTTTCACT  
CGTAAATTTAGTA--TAAACTTACCAGAGTACTACGAATGTTTAAACTCAAAGGGCTTG  
GCGGTGTTTTAGACCTCTCAGGGGAACCTGTCTCATAATCGACAGTCCACGTTAAACCTA  
ACCTTTTATAGTAATACAGCTTGTATACCGTCGTCGTCAGGTAACCTCTAAAAATAAAGT  
AGTTAGCTTGAGAATT--TT-ATTAATTAGAACGTCAGATCAAGGTGCAGCTAATGAAGA  
GGTGAGGATGGGTTACAATTATATATTTGTAAATACGGTGCT-TGAAATTAAGCAC-CTA  
AAGGAGGACTTGAAAGTAATTTTAATTATATAAGTAAATGAATAAGGCTCTGAAACGTG  
CAGAATTTTAATGGTGAACAGACCAACCCTCAAAGACTTCTGCATCTTTAGGATATTCT  
GGTCCAACATCGAGGTCACAAACCTTTTTTCGATATGGGCTCTTAAAAAAGATAATGCT  
GTTATCCCTACGGTAACTAATTCTTTAATCAAAAATTT-TGGATCAAC-ACAAGTCAGA  
TTTT-AAAGGAGGCTTCAAGTGTCTCCTCGGTTGCCCCAACCAAAGT--ATTTAATAGTTT  
T-TCTTTTA-CTTAATTG--ATAAGATCTATTAATTTTCTAAAGCTCGATAGGGTCTTC  
TTGTCTTTTAATACAATCTGAACTTTTTTCATCCAAAAATAAAATTCTAAATAATTTAAAA  
GAGACAGGTATATTCTTGTCAAACCATTCTTCCAGCCTTCAATTATAAGGCAAATGATT  
ATGCTACCTTTGCACGGTCAGAGTACCGCGGCCGTT-TAAAA-CACTGGGCAGGTCCGAC  
TTCGTATCTAAT-ATTAACAC--CATTATATATCTTATTTGGAATGTGATCTGGATTGGT  
TGGTACTGCTTTAAGGTTGTTAATTCGTGCAGAATTAGGACAACCAGGTGCCTTACTTGG  
AGACGATCAATTATATAATGTTATTGTAACAGCTCATGCTTTTGTATAATTTTTTTCTT  
AGTAATACCAATGATGATTGGAGGGTTTGGAATTGACTTGTGCCTTTAATGTTAGGGGC

CCCAGATATGGTATTTCTCGCTTAAATAATATAAGTTTTGACTTCTCCCTCCTGCCCT  
TTTACTTCTATTATCGTCAGCTGCTGTAGAAAGTGGAGTGGGTACAGGATGAACTGTATA  
CCCACCATTGGCTGGTAATTTAGCTCATGCTGGTGGGTCTGTAGATCTAGCAATCTTTTC  
TTTACACCTAGCTGGGGTATCATCTATTTTAGGGGCAGTAAATTTTATTACTACAATTAT  
TAATATACGATGACAAGGAATAAAATTTGAACGTCTTTCACCTTTTGTATGGTCGGTAAA  
GATTACGGCTATTTTACTTCTTTTATCTTTACCTGTGCTAGCTGGTGCAATTACTATATT  
ACTAACTGACCGAAATTTTAATACTGCTTTTTTTGATCCAGCAGGAGGTGGTGATCCTAT  
TTTGTATCAACATCTTTT

>tulipa

NNNNNNNNNNNNNNNNNNNTTCTTTTATGGTAAAAAGACAGTTAGGCAAT-CAGGATTATT  
AGATCTTTAGTAGAGGAGTAAAACCTATATACTGAAAGTTATTCCTAAAATAATTT-GTT  
TATGTTGAATCTGTGATAGCTTTAAGGGAACTGGGATTGGATACCCCATTTTATTAGT  
CGTAAATTTAGTT--TAGGCTTACCGGAGTACTACGAATGTTTAAAACTCAAAGGGCTTG  
GCGGTGTTTTAGACCCCTCAGGGGAACCTGTCTCATAATCGACAATCCACGTAAACCTA  
ACCTTTTATAGTAATACAGCTTGTATACCGTCGTCGTCAGGTAACCTCTTAAATAAAAT  
AGTTAGCTTGAGAAATT--TG-ATTAATTAGAACGTCAGATCAAGGTGCAGCTAATGAAAG  
GGTGAGGATGGGTTACAATTACATATTTGTAAATACGGCACT-TGAAATTAAGTGC-TTA  
AAGGAGGACTTGAAAGTAATTCTATTTATATAAATAGAATGAATAAGGCTCTGAACCGTG  
CAGAATTTAATGGTCGAACAGACCAACCCTCAAAGACTTCTGCATCTTTAGGATATTCT  
GGTCCAACATCGAGGTCACAAACCTTTTTTTCGATATGGGCTCTTAAAAAAGATAATGCT  
GTTATCCCTACGGTAACATAATCCTTTGATCAAAAAATT-TGGATCAAC-ACAAGTCAGA  
CTTT-AAAGGAGGCTTTAGATGCTCCTCGGTTGCCCCAACCAAAT--ATTTAATAGTTT  
T-TCTTTTA-CTTAATCG--ACGAGATCTATTAATTTTTCTAAAGCTCGATAGGGTCTTC  
TTGTCTTTAATATTATCTGGACTTTTTCATCCAAAAATAAAGTTCTAAATAATTTAAAA  
GAGACAGCTATACTCTTGTCAAACCATTCAATCCAGCCTTCAATTATAAGGCAAATGATT  
ATGCTACCTTTGCACGGTCAGAGTACCGCGGCCGTT-TAAAA-CACTGGGCAGGTCCGAC  
TTCGTATCTAAC-ATTAACACGACGTTATATATCTTATTTGGGATGTGATCTGGGTTAGT  
TGGTACTGCTTTAAGTTTATTAATTCGTGCAGAATTAGGACAACCAGGTGCTTGCTTG  
AGACGATCAATTGTATAATGTTATTGTGACGGCTCATGCTTTTGTATAATTTTTTTCTT  
GGTGATGCCTATAATGATTGGAGGTTTTGGGAATTGGCTGTACCTCTAATACTAGGGGC  
TCCAGATATAGTATTCCCTCGATTAAATAATATGAGTTTCTGACTTCTACCTCCTGCTCT  
TTTACTTCTTTTATCATCGGCTGCTGTAGAAAGTGGGGTAGGTACAGGATGAACTGTATA  
TCCTCCTTTGGCTGGTAACCTAGCTCATGCTGGGGGGTCTGTAGATCTAGCAATTTTTTC  
TTTACATTTAGCTGGGGTATCTTCTATTTTAGGGGCGGTAAATTTTATTACCACAATTAT  
TAATATACGATGACAGGGAATAAAATTTGAGCGCCTTTCTCTTTTTGTGTGATCAGTGAA  
GATTACGGCTATCTTGCTTCTTTATCCTTGCTGTATTAGCTGGTGCTATTACTATGCT  
GTTAACTGATCGAAATTTTAATACTGCCTTCTTTGATCCGGCAGGAGGTGGTGATCCTAT  
TTTATATCAGCACCTTTTT

>obscurus

AACCAAGAAATTTAGTCATTCTTTTACGGTAAAAAGACAGTTAGACGGG-TAGAATCGTT  
AGATCTTTAGTATAGGAGTAAAATCTAAATACTAAAAGTTATCCCAAACGATTT-ATT  
AGCGTTGAATCTGTGACAACTTTAAGGGAACTGGGATTGGATACCCCATTTTATTAGT  
CGTAAATATAGTT--AGGATTTACCAGAGTACTACGAATGTTTAAAACTCAAAGGGCTTG  
GCGGTGTTTTAGACCTCTCAGGGGAACCTGTCTCGTAATCGACAATCCACGTCAAACCTA  
ACCTCTTATTGTAATACAGCTTGTATACCGTCGTCGTCAGGTAACCTCTTAAATTTGAGT  
AGTTAGCTTGAGAAATT--TA-ATTGATTAGAACGTCAGATCAAGGTGCAGCTAATGAAGA  
GGTGAGGATGGGTTACAATTACATATTCGTAAATACGGCACT-TGAAATGAAGTGC-TTA  
AAGGAGGACTTGAAAGTAATTCTAATTATATAAATAGAATGAATGTGGCTCTGAAACGTG

CAGAATTTTAATGGTCGAACAGACCAACCCTTAAAGACTTCTGCATCTTTAGGACATTCT  
GGTCCAACATCGAGGTCACAAACCTTTTTTCGATATGGGCTCTCAAAAAGATAATGCT  
GTTATCCCTACGGTAACATAATTCTTTGATCAAAAACT-TGGATCAAC-ACAAGTCAGA  
CTTA-AAAGGAGGCTTTAGATACTCCTTGGTTGCCCCAACCAAAGT--ATTTAATAGTTT  
T-TCTTTTA-GCTAATTG--AT-AGATCTATTAATTCTTCTAAAGCTCGATAGGGTCTTC  
TTGTCTTTTAATAAAATCTGAACTTTTTATTTCAGAAAATAAAATTCTAAGTAATCTAAAA  
GAGACAGGCGTATTCTTGTCAAACCATTATTCCAGCCTTCAATTATAAGGCAAATGATT  
ATGCTACCTTTGCACGGTCAGAGTACCGCGGCCGTT-TAAAA-CACTGGGCAGGTCCGAC  
TTCGCATTTTGT-TCTAACGCAACATTGTATATTTGTTTGAATATGATCGGGATTGGT  
TGGAAGTCTTTAAGGTTGTTAATTCGTGCAGAAATTAGGGCAGCCAGGTGCTTTACTTGG  
TGACGATCAGCTGTATAATGTTATTGTAACAGCCCATGCTTTTGTATAATTTTTTTCTT  
AGTAATGCCTATAATGATTGGAGTTTTGGAACTGGCTTGACCTTTGATGTTAGGGGC  
TCCAGATATGGTATTTCTCGTCTAAATAATATAAGTTTTTGAATTTCTCCTCCTGCTCT  
TTTGCTTCTCCTATCATCAGCCGCCGTAGAGAGTGGTGTAGGTACAGGGTGAAGTGTATA  
TCCTCCTCTTCTGGGAATTTAGCCCATGCTGGGGGGTCTGTAGATCTAGCAATTTTTTC  
TTTACATCTAGCTGGTGTATCCTCTATTTTGGGGGCAGTAACTTTATTACTACAATCAT  
TAATATACGATGACAAGGAATGAAGTTTGAGCGTCTCTCTTTGTTTGTGTTGATCGGTAAA  
AATTACAGCTATTTTACTTTTACTATCTTTGCCTGTCTTAGCTGGTGCAATTACAATGTT  
GTTAACTGATCGAAATTTTAATACTGCTTTCTTTGATCCAGCGGGTGGTGGGGATCCAAT  
CTTGTATCAGCACCTCTTC

>spurius

AACCAAGAAATTTAGTCATTCATTTACGGTAAAAAGACAGTTAGGTAAA-TAGGTCATTA  
AGATCCTTAGTATAGGAGTAAAATCTAAATACTAAAAGTTATACCGAATATGGCTT-ACC  
TATACTGAATCTGTGACAACTTTAAGGGAACTGGGATTGGATACCCCATTTTTAGT  
TGTAATCTAGTT--TAAGCTTACCGGAGTACTACGAATGTTTAAAACTCAAAGGGCTTG  
GCGGTGTTTTAGACTTCTCAGGGGAACCTGTCTCGTAATCGACAATCCACGTTAAACCTA  
ACCTTTTATGGTAATACAGTTTGTATACCGTCGTCGTCAGGTAATTCTAAAAATATGGT  
AGTTAGCTCGAGAGTC--TT-ATTAGTTAAACGTCAGATCAAGGTGCAGCTAATAAAAA  
GGTGAGGATGGGTACAATTATATTTATAAAATACGGCACTATGAAATGGAGTGTCTTA  
AAGGAGGACTTGAAAGTAATTTTAATTATGTAATAAAATGAATTTGGCTCTGAAACGTG  
CAGAATTTTAATGGTCGAACAGACCAACCCTCAAAGACTTCTGCATCTTTAGGACATTCT  
GGTCCAACATCGAGGTCACAAACCTTTTTTCGATATGGGCTCTGAAAAAGATAATGCT  
GTTATCCCTACGGTAACATAATTCTTTAATCAATAATGTTTGGATCAAT-GCAAGTAAGA  
TTTT-AAAGGAGGCTTCACCTACTCCTCGGTTGCCCCAACCAAAT--ATTTAATAGCTC  
T-TCTTTTA-TTTAATTG--ATAGAATCTATTAATTTTTTTAAAGCTCGATAGGGTCTTC  
TTGTCTTTTAATTTTATCTGGACTTTTTTATCCAAAAATAAAATTCTAGATAATTTAAAA  
GAGACAGGTGTATTCTTGTCAAACCATTATTCCAGCCTTCAATTATAAGGCAAATGATT  
ATGCTACCTTTGCACGGTCAGAGTACCGCGGCCGTT-TAAAA-CACTGGGCAGGTCCGAC  
TTCATATTTAGT-ACTAACATGACATTATATATTCTGTTTGAATATGATCTGGGTGGT  
TGGAAGTCTTTGAGATTGTTAATTCGGGCAGAATTAGGGCAGCCAGGTGCTTTACTTGG  
AGATGATCAGTTATATAATGTGATTGTAACAGCACACGCTTTTGTATAATCTTTTTTT  
AGTAATGCCTATAATAATTGGTGGTTTTGGAACTGATTAGTGCCCTTAATGCTGGGTGC  
TCCTGATATGGTGTTTCTCGACTAAATAATATGAGTTTTTGGCTTCTCCTCCTGCGCT  
TTTGCTTCTTTTATCATCGGCTGCGGTAGAAAGTGGTGTGGGTACTGGATGAACTGTTTA  
TCCACCTTTAGCAGGAAATCTAGCTCATGCTGGTGGATCTGTGGATCTGGCGATTTTTTC  
TTTACATCTAGCTGGTGCTTCTTCTATTTTAGGGGCAGTAAATTTTATTACTACAATTAT  
TAATATGCGGTGGCAGGGGATGAAATTTGAACGTCTGTCACTTTTTGTATGGTCGGTAAA  
AATCACAGCTATTTTGCTTCTTTTATCTTTACCAGTATTAGCTGGTGCAATTACGATACT



TTTAACTGATCGAACTTTAATACTGCTTTTTTTGATCCTGCGGGAGGCGGTGATCCTAT  
TTTGTATCAGCATCTGTTT

>atlanticus

AACCAAAAAATTTAGTCATTCATTTACGGTAAAAAGACAGTTAGGTAAA-GAGGTCATTA  
AGATCTTTAGTATAGGAGTAAAATCTAAATACTAAAAGTTATACCAGATATGGCTT-GCC  
TATACTGAATCTGTGACAACTTTAAGGGAACTGGGATTGGATACCCCATTTTITAGC  
TGTAATCTAGTT--TAAGCTTACCGGAGTACTACGAATATTTAAAACTCAAAGGGCTTG  
GCGGTGTTTTAGACTTCTCAGGGGAACCTGTCTCGTAATCGACAATCCACGTTAGACCTA  
ACCTTTTATGGTAATACAGTCTGTATACCGTCGTCGTCAGGTAACCTCTAAAAATATGGT  
GGTTAGCTCGACAGTC--TT-ATTAGCTAAAACGTCAGATCAAGGTGCAGCTAATAAAAA  
GGTGAGGATGGGTACAATTATATTTATAAATATGGCACTATGAAATGGAGTGTCTTA  
AAGGAGGACTTGAAAGTAATTTTAATTATATAAATGAGATGAATTTGGCTCTGAAACGTG  
CAGAATTTTAATGGTCGAACAGACCAACCCTCAAAGACTTCTGCATCTTTAGGACATTCT  
GGTCCAACATCGAGGTCACAAACCTTTTTTTCGATATGGGCTCTTGAAAAAGATAATGCT  
GTTATCCCTACGGTAACTAATTCCTTTGATCAATATTATTTGGATCAAT-GCAAGTAAGA  
TTTT-AAAGGAGGCTTCATCTACTCCTCGGTTGCCCCAACCAAAAT--ATTTAATAGTTC  
T-TCTTTTA-CTTAATTG--ATAGAATCTATTAATTTTTTTAAAGCTCGATAGGGTCTTC  
TTGTCTTTTAATTTTCATCTGGACTTTTTTCATCCAAAATAAAATTCTAGATAATTTAAAA  
GAGACAGGTGTATTCTTGTCAAACCATTTCATCCAGCCTTCAATTATAAGGCAAATGATT  
ATGCTACCTTTCACGGTCAGAGTACCGCGGCCGTT-TAAAA-CACTGGGCAGGTCCGAC  
TTCATATTTAGT-ACTAACATGACATTATATATCCTTTTTGGAATATGATCTGGGTGGT  
TGGAAGTCTTTGAGGTTGTTAATTCGTGCAGAAATAGGGCAGCCAGGTGCTTTACTTGG  
AGATGATCAGTTATATAATGTAATTGTAACAGCACACGCTTTTGTTATAATCTTTTTTT  
AGTAATGCCTATAATAATTGGTGGTTTTGGAACTGATTAGTGCCCTTGATGCTGGGTGC  
TCCTGATATAGTGTTTCCTCGGCTAAATAATATAAGTTTCTGGCTTCTTCCTCCTGCGCT  
CTTGCTTCTTTATCATCGGCTGCGGTAGAGAGTGGCGTGGGTACTGGATGAACTGTTTA  
TCCGCCTTTAGCAGGAAATCTGGCCCATGCTGGTGGGTCTGTGGATCTGGCAATTTTTTC  
TTTACATCTAGCCGGTGCTTCTTCTATTTTAGGAGCGGTAAATTTCACTACTACAATTAT  
TAATATGCGGTGGCAGGGAATGAAATTTGAGCGTCTGTCACTTTTTGTGTGGTCGGTAAA  
AATCACAGCTATTTTACTTCTTTTATCTTTACCAGTATTAGCTGGTGCAATTACGATACT  
TTTAACTGATCGAACTTTAATACTGCTTTTTTTGATCCTGCAGGAGGTGGTATCCTAT  
TTTGTATCAGCATCTGTTT

>balteatus

AACCAAGAAATTTAGTCATTCCTTTTTCGGTAAAAAGACAGTTAGGCAAA-AAAGGCCATT  
GGACCTTTAGTACAGGGGTAAAATCTAAATACTAAAAGTTATGCTAGATATGGCCA-TTT  
TGTGCTGAATCTGTGACGACTTTAAGGGAACTGGGATTGGATACCCCATTTTITAGT  
AGTAAA-TTAACT--TAAGTTTACCAGAGTACTACGAATATTTAAAACTCAAAGAGCTTG  
GCGGTGTTTTAGACCTCTCAGGGGAACCTGTCTCATAATCGACAATCCACGATATACCTG  
ACCTTCGTAGCAATTCAGCTTGTATACCGTCGTCGTCAGGTAACCTCTTAAATATAGT  
AGTTAGCTTGAAAAAT--TT-ATTGATTAATACGTCAGATCAAGGTGCAGCTAATAAAAG  
GGAGAGGATGGGTACAATTACATATTTGTAATTACGGTATT-TTAAAAGAAATATTCTG  
AAGGAGGACTTGAAAGTAATCTTAGTTATATAAATAAGATGAATAAGGCTCTGAAACGTG  
CAGAATTTTAATGGTCGAACAGACCAACCCTTAAAGACTTCTGCATCTTTAGGACATTCT  
GGTCCAACATCGAGGTCACAAACCTTTTTTTCGATATGGGCTCTTGAAAAAGATAATGCT  
GTTATCCCTACGGTAACTAATTCCTTTGATCAAAATCTT-TGGATCAAT-ACGAGTGTGA  
TTTA-AAAGGAGGCTTTATCTACTCCTCGGTTGCCCCAACCAAGTACACTTAATGGCTT  
T-TCTTTTA-CTTGATTG--ATAAAGTCCATTAATTCCTTCTAAAGCTCGATAGGGTCTTC  
TTGTCTTTTAATTATATCTGGACTTTTTTCATCCAAGATAAAATTCTAGAAAATCAAAAA

GAGACAGATGTATTCTTGTCAAACCATTTCATTCCAGCCTTCAATTATAAGGCAAATTATT  
ATGCTACCTTTGCACGGTCAGAGTACCGCGGCCGTT-TAAAA-CACTGGGCAGGTCCGAC  
TTCGTATTTAGA-ACTGACACGACATTGTATATTTTATTTGGAATATGGTCTGGATTAGT  
TGGGACTGCTTTAAGTTTATTAATTCGTGCAGAATTAGGGCAGCCTGGTGCTTTGCTCGG  
AGATGATCAACTATATAATGTAATTGTAAACAGCCCATGCTTTTGTATAATTTTCTTTT  
AGTAATGCCTATAATAATTGGGGGATTGGAACTGGTGGTACCATTGATATTAGGGGC  
TCCAGATATAGTTTTCTCGTTGAATAATATAAGTTTTGGCTTCTCCTCCTGCATT  
ATTACTTCTTTATCATCGGCTGCAGTAGAAAGAGGAGTAGGTACAGGATGAACAGTGTA  
TCCACCCTTAGCGGGAAATTTAGCCCATGCTGGAGGTTCTGTGGACCTAGCAATTTTTC  
TCTTCATCTTGCCGGGGTTTCTTCTATTTTAGGGGCAGTAACTTTATTACCACAATTAT  
TAATATACGATGACAAGGAATAAAATTTGAGCGTCTTTCGTTGTTTGTATGATCTGTAAA  
AATTACTGCTATTTTACTTTTATTATCTCTACCTGTATTAGCTGGGGCTATTACTATGCT  
TTTAACTGATCGAAATTTTAATACTGCTTTTTTGTATCCAGCAGGAGGTGGTGACCCAAT  
CTTGATCAACATTTATT

>californiconus

TACCAAAAAATTAAGTCATACCACTCCGGTAAAAAGACAGTTAGACATG-AATAGTCTAT  
AAAATATTGATATAAAGGTAATTTGTATATCAGTTAGTAGTTTAATAATGACCT----  
-ATGTTGAATCTGTGACAGCTTTGAGGGAACTGGGATTGGATACCCACTATTCTTAGC  
TGTAACCTTGATTGCTTGATTTACCAGAGCACTACGAACATTTAAACTCAAAGGGCTTG  
GCGGTGTTTTAGACCATTAGGGGAACCTGTCTCATAATCGACAATCCACGTTAAACCTG  
ACCTTTTTTCGTAAT-CAGCCCGTATACCGTCGTCGTCAGGTAACCTCTAAAAATTTAAA  
AGTTAGCTAGAAAATACTA-ATAAGTTAAACGTCAGATCAGGGTGCAGCCTATAAAAA  
GGGGAGGATGGGTACAATTAATATTCTTAACGTTAT-TCAGA-AAGATAACTTG  
AAGGAGGACTTGAAAGTAATTTTTTTACATAAATTATATGAATTAGGCTCTGAAACGTG  
CAGAATTTAATGGTCGAACAGACCAACCCTGAAGACTTCTGCATCTTCAGGATATTCT  
GGTCCAACATCGAGGTCACAAACCTTTTTTCGATAGGAACTCTCAAAAAAGATAATGCT  
GTTATCCCTACGGTAACCTATTTTCTTGATCAAAAAGTT-TGGATCAGT-ACTTGTTAGT  
TTAT-AAAGGAGGCTTTTTTTACTCCTTAGTTGCCCAACCAAAT--GTTTACAACAC  
A-ATTTTT-CGTCAATA--AATCTTTGTTAATTTATTTCAAGCTCGATAGGGTCTTC  
TTGTCTTTAATTATATTAGGACTTTTTCATCCAAAATAAAATTCTATTGAATCATAAA  
GAGACAGTTGCACTCTTGTCAAACCATTTCATTCCAGCCTTCAATTATAAGGCAAATGATT  
ATGCTACCTTTGCACGGTCAGAGTACCGCGGCCGTTGAAAAA-CACTGGGCAGGTCCGAC  
TTCATATC-AAA-AATGTCATAACATTATATATTTTATTTGGTATATGATCTGGGTAGT  
TGGTACAGCTTAAGTCTACTTATTCGGGCTGAATTAGGTCAACCTGGAGCCTTATTAGG  
AGATGATCAGCTGTATAATGTTATTGTTACGGCTCATGCTTCGTTATAATTTTTTTCTT  
GGTTATGCCTATGATAATTGGTGGTTTTGGTAACTGGTGGTACCTTAATACTTGGAGC  
ACCTGATATGGTATTTCCACGACTGAATAATATAAGCTTTTACTTTTACCCCTGCTTT  
GTTATTACTTCTATCATCAGCTGCAGTGGAAAGAGGTGTGGGGACTGGATGAACGGTCTA  
TCCCCATTATCTGGAAACCTAGCTCATGCAGGAGGTTCGGTAGACTTGGCCATTTTTTC  
ATTGCACCTTGCTGGTGTTCATCAATTTTAGGGGCAGTAAATTTTATTACAACAATTAT  
CAACATACGATGACAAGGAATGCAATTTGAGCGTCTTCCTTTGTTTGTATGATCGGTGAA  
AATTACTGCTATTCTTTACTTCTGTGCTACCTGTGTTAGCAGGAGCCATTACTATGCT  
TCTAACAGATCGAACTTTAATACAGCTTCTTTGATCCAGCAGGAGGTGGTGATCCGAT  
CCTATATCAGCATTTGTTT
